# Supplementary material for: A Role in 15-Deacetylcalonectrin Acetylation in the Non-Enzymatic Cyclization of an Earlier Bicyclic Intermediate in Fusarium Trichothecene Biosynthesis
Source: MDPI journal article supplement (doi:10.3390/ijms25084288), 2024-04-12
Supplement: s1 [file s1]

# **A role in 15-deacetylcalonecetrin acetylation in the non-enzymatic cyclization of an earlier bicyclic intermediate in *Fusarium trichothecene* biosynthesis**

Yoshiaki Koizumi<sup>1</sup>, Yuichi Nakajima<sup>2</sup>, Yuya Tanaka<sup>2</sup>, Kosuke Matsui<sup>2</sup>, Masato Sakabe<sup>3</sup>, Kazuyuki Maeda<sup>2</sup>, Masayuki Sato<sup>4</sup>, Hiroyuki Koshino<sup>5</sup>, Soichi Sato<sup>1,3</sup>, Makoto Kimura<sup>2,4</sup>, Naoko Takahashi-Ando<sup>1,3,4</sup>

<sup>1</sup>Graduate School of Science and Engineering, Toyo University, 2100 Kujirai, Kawagoe, Saitama 350-8585, Japan

<sup>2</sup>Graduate School of Bioagricultural Sciences, Nagoya University, Furo-cho, Chikusa-ku, Nagoya, Aichi 464-8601, Japan

<sup>3</sup>Faculty of Science and Engineering, Toyo University, 2100 Kujirai, Kawagoe, Saitama 350-8585, Japan

<sup>4</sup>Plant & Microbial Engineering Research Unit, Discovery Research Institute (DRI) RIKEN, 2-1, Hirosawa, Wako, Saitama 351-0198, Japan

<sup>5</sup>Molecular Structure Characterization Unit, Technology Platform Division, Center for Sustainable Resource Science (CSRS) RIKEN, 2-1, Hirosawa, Wako, Saitama 351-0198, Japan

**Table S1.** Primers used for generation of the  $\Delta Fgtri3$  (FGD3) and  $\Delta Fgtri5\Delta Fgtri11$  (FGD5/11) mutants

| No. | Primer name     | Primer sequence                                  | Comments                                                                                                                                                       |
|-----|-----------------|--------------------------------------------------|----------------------------------------------------------------------------------------------------------------------------------------------------------------|
| #1  | MFTri3-LAU      | 5'-TATCTTTACCACAACAGCCGATTGCCCC-3'               | Primer for screening of the <i>FgTri3</i> gene disruption mutant (used in combination with #2)                                                                 |
| #2  | MFTri3-LAD      | 5'-GCACTCTCTGATTGGAGGAGAACACTTG-3'               | Primer for screening of the <i>FgTri3</i> gene disruption mutant (used in combination with #1)                                                                 |
| #3  | MFTri3U-Sna     | 5'-GT <u>ACGTAG</u> TCATTGTCTCCATTATAACAAGGC-3'  | Inward primer containing a <i>Sna</i> BI site (underlined) used for the construction of the <i>FgTri3</i> gene disruption vector (used in combination with #4) |
| #4  | MFTri3D-Sna     | 5'-TTT <u>ACGTAT</u> TGCAGGAATGGAAGTTCATTGTAG-3' | Inward primer containing a <i>Sna</i> BI site (underlined) used for the construction of the <i>FgTri3</i> gene disruption vector (used in combination with #3) |
| #5  | MFTri3U-inv/Spe | 5'-A <u>ACTAGT</u> ATGGGGCCAAGAGATCAAGAACCTG-3'  | Outward primer containing a <i>Spe</i> I site (underlined) used for the construction of the <i>FgTri3</i> gene disruption vector (used in combination with #6) |
| #6  | MFTri3D-inv/Not | 5'-A <u>GCGGCCGCT</u> TGAGGGATTGGCGTCGAGTCTG-3'  | Outward primer containing a <i>Not</i> I site (underlined) used for the construction of the <i>FgTri3</i> gene disruption vector (used in combination with #5) |
| #7  | MFTri11-LAU2    | 5'-TCAAGGCTCTCCCTGGGATG-3'                       | Primer for PCR confirmation of <i>FgTri11</i> gene disruption (used in combination with #8)                                                                    |
| #8  | MFTri11-LAD     | 5'- ATGAGTCGATCAATTTAGCGGCTGCGAG-3'              | Primer for PCR confirmation of <i>FgTri11</i> gene disruption (used in combination with #7)                                                                    |



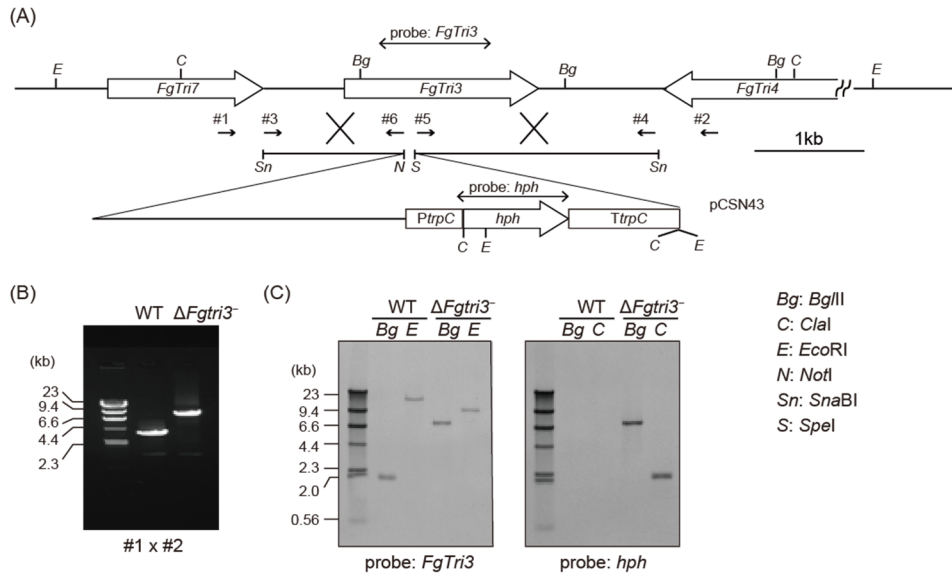

**Supplementary Figure S1.** Generation of a  $\Delta Fgtri3$  mutant used in this study. (A) The gene disruption vector p $\Delta FgTri3$ -hph was constructed by replacing a portion of an *FgTri3* coding region with pCSN43 [1] that contains the *hph* (hygromycin B phosphotransferase gene) cassette by the inverse polymerase chain reaction (IPCR) method [2] as follows: (1) *FgTri3* and its flanking regions were amplified by long PCR with inward primers #3 and #4 (Table S1), both of which had a *Sna*BI recognition site (Table S1); (2) the amplified product was self-ligated after digestion with *Sna*BI; (3) the ligated flanking regions were amplified by IPCR with the outward primers #5 and #6 (Table S1) that had *Spe*I and *Not*I sites, respectively (Table S1); and (4) the IPCR product was cloned between *Spe*I and *Not*I sites downstream of the *trpC* terminator. After transformation, the colonies were selected with 300  $\mu$ g/ml of hygromycin B. (B) PCR analysis of genomic DNA isolated from the wild-type (WT) and  $\Delta Fgtri3$  mutant strains. Two primers #1 and #2 that amplify the region encompassing *FgTri3* were used. An amplicon from the disruption mutant is 4.4 kb larger than the one from the WT strain. (C) Southern blot analysis of genomic DNA isolated from the WT and  $\Delta Fgtri3$  mutant strains. The probes were synthesized with a PCR DIG probe synthesis kit [3] and detected with a DIG Luminescent Detection kit (Roche Diagnostics GmbH, Mannheim); standard hybridization, washing, and detection conditions provided by the manufacture were used for detection. Either blot showed expected banding patterns with probes that correspond to *FgTri3* and *hph*.

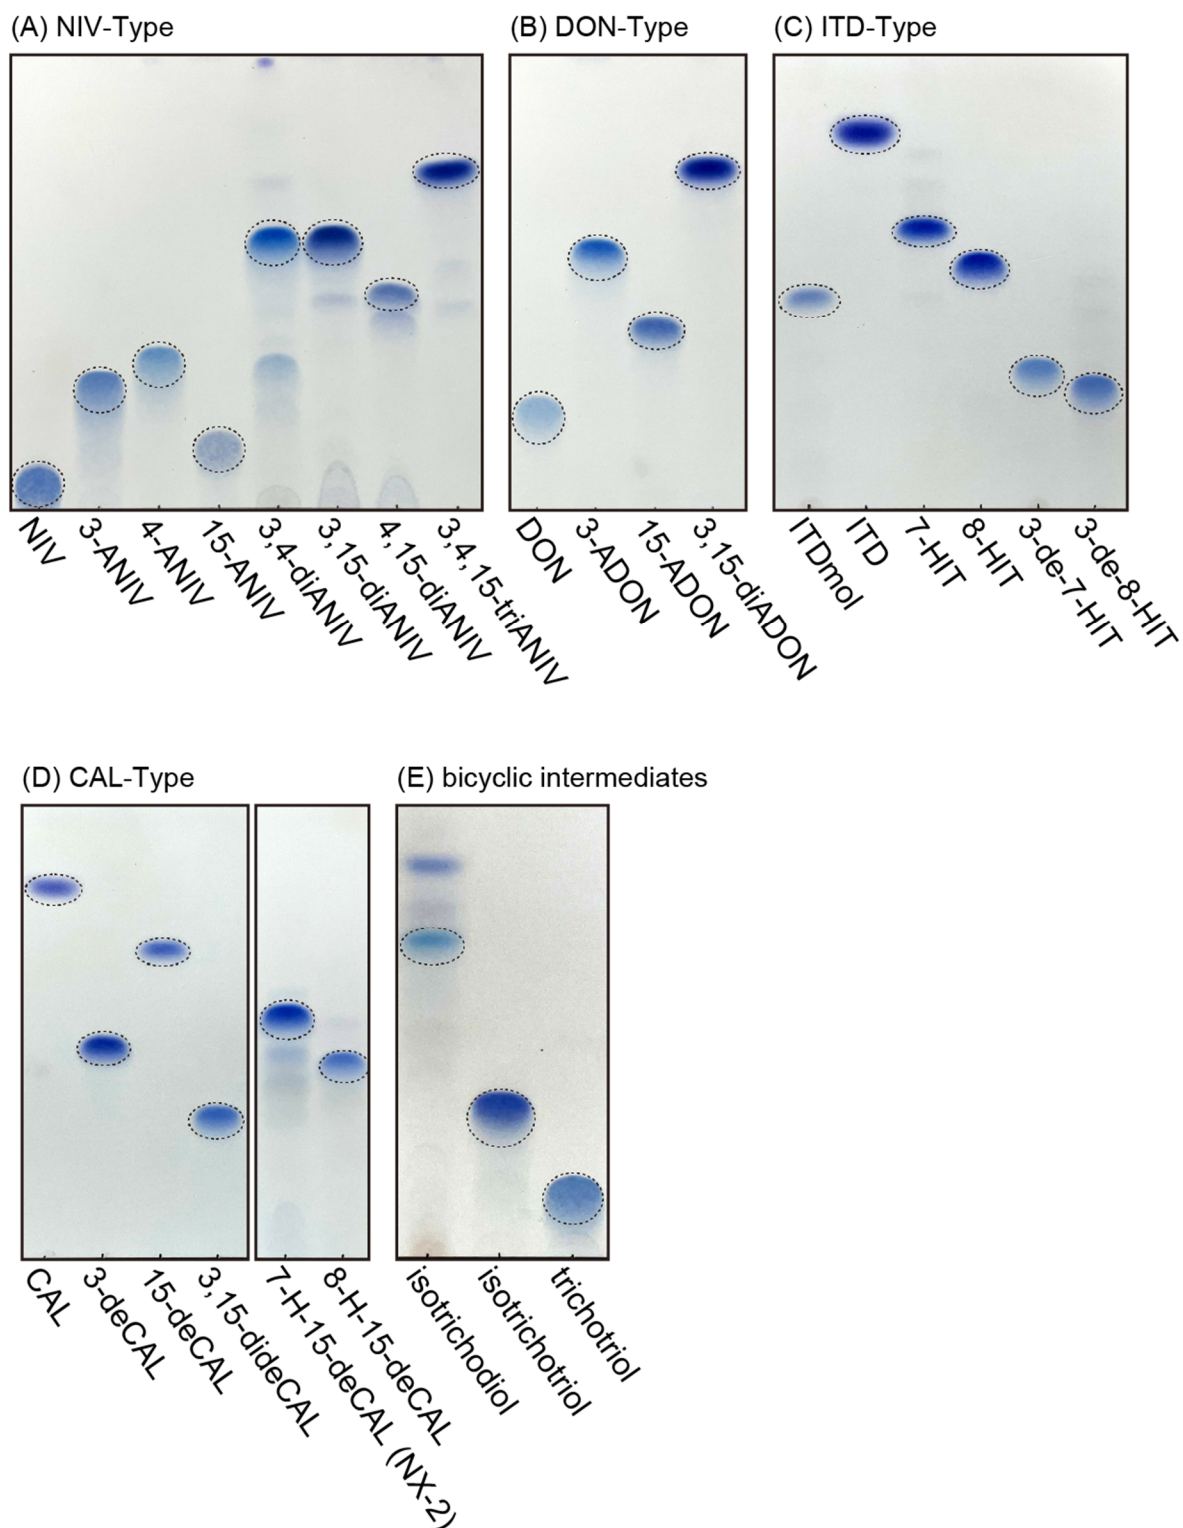

**Supplementary Figure S2.** Trichothecene standards on TLC. (A) NIV-type trichothecenes. NIV was produced by the deacetylation of 4-acetylivalenol (4-ANIV). 4-ANIV and 4,15-diacetylivalenol (4,15-diANIV) were produced through the incubation of MAFF 111233 WT culture. 3-Acetylivalenol (3-ANIV) was produced through the incubation of the culture of

NBRC 113183, an *Fgtri13*\_o/e strain of *F. graminearum* MAFF 101551 [4]. 15-Acetylnivalenol (15-ANIV) and 3,15-diacetylnivalenol (3,15-diANIV) were produced through the incubation of the culture of NBRC 113182, an *Fgtri7*<sup>-</sup> #1 s1\* strain of *F. graminearum* MAFF 111233 [4]. 3,4,15-Triacetylnivalenol (3,4,15-triANIV) was produced through the incubation of the culture of NBRC 114123, an *FgTri8* disruptant of *F. graminearum* MAFF 111233 [5]. 3,4-Diacetylnivalenol (3,4-diANIV) was obtained by 3-*O*-acetylation of 4-ANIV by Tri101p. (B) DON-type trichothecenes. 3,15-diADON was produced through the incubation of the culture of YN\_149. (C) ITD-type trichothecenes. 3-Deacetyl-7-hydroxyisotrichodermin (3-de-7-HIT) and 3-deacetyl-8-hydroxyisotrichodermin (3-de-8-HIT) were obtained through the alkaline deacetylation of 7-HIT and 8-HIT, respectively. (D) CAL-type trichothecenes. 3,15-dideCAL is the abbreviation for 3,15-dideacetylcalonectrin. 7-H-15-deCAL was obtained through the incubation of the culture of *F. graminearum*  $\Delta Fgtri1/FgTri1_{NX}$  chemotype [6]. Another name for 7-H-15-deCAL is NX-2. 8-H-15-deCAL was obtained through the incubation of FGD3 culture, and its structure was confirmed by NMR analysis (Supplementary Figure S3, spot 3). (E) Bicyclic trichothecene intermediates. Isotrichodiol, isotrichotriol and trichotriol were produced through the incubation of FGD3 culture, and their structures were confirmed by NMR analysis (Supplementary Figure S3, spots 1, 3, and 4).

(A)

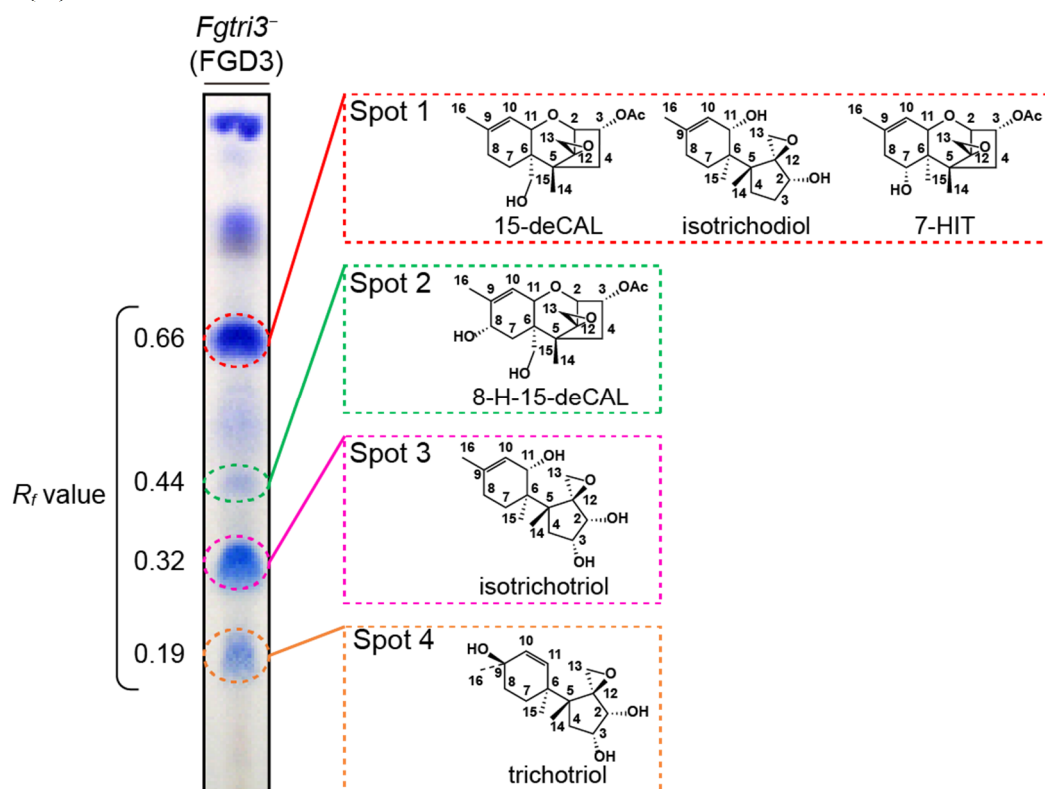

(B)

Spot 1 : 15-deCAL [ $^1\text{H}$  NMR Data of 15-deCAL (600 MHz,  $\text{CDCl}_3$ )]

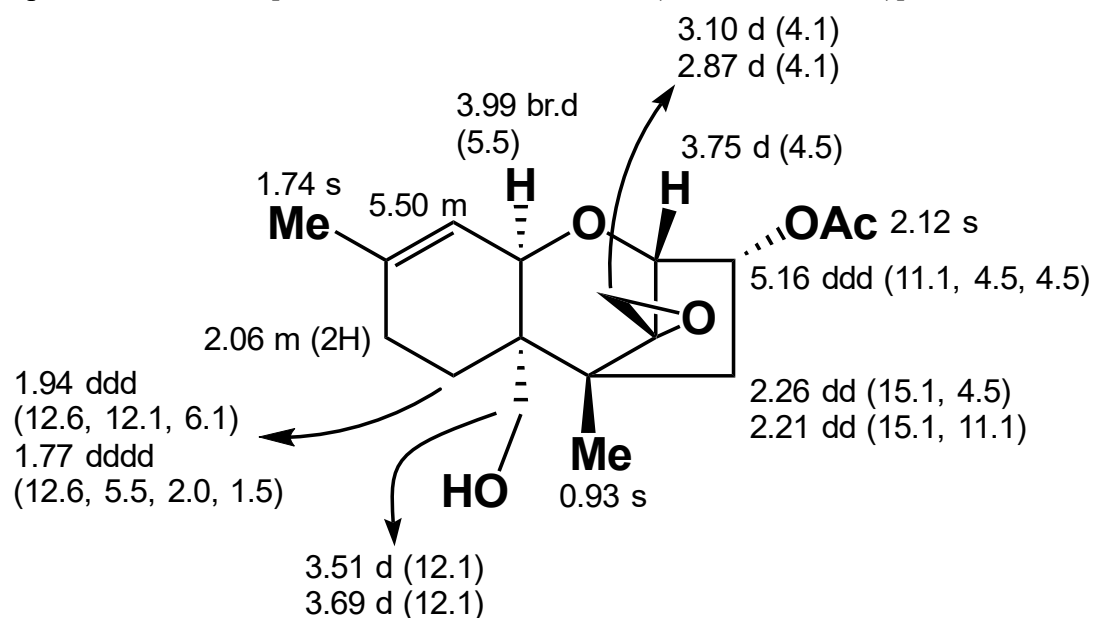

$^{13}\text{C}$  NMR Data of 15-deCAL (151 MHz,  $\text{CDCl}_3$ ) 78.1 (C-2), 71.4 (C-3), 39.3 (C-4), 45.3 (C-5), 44.2 (C-6), 20.8 (C-7), 28.4 (C-8), 140.5 (C-9), 119.3 (C-10), 68.3 (C-11), 65.2 (C-12), 48.6 (C-13), 12.5 (C-14), 62.8 (C-15), 23.3 (C-16), 21.0, and 170.5 (3-OAc) ppm.

Spot 1 : isotrichodiol [ $^1\text{H}$  NMR Data of isotrichodiol (600 MHz,  $\text{CDCl}_3$ )]

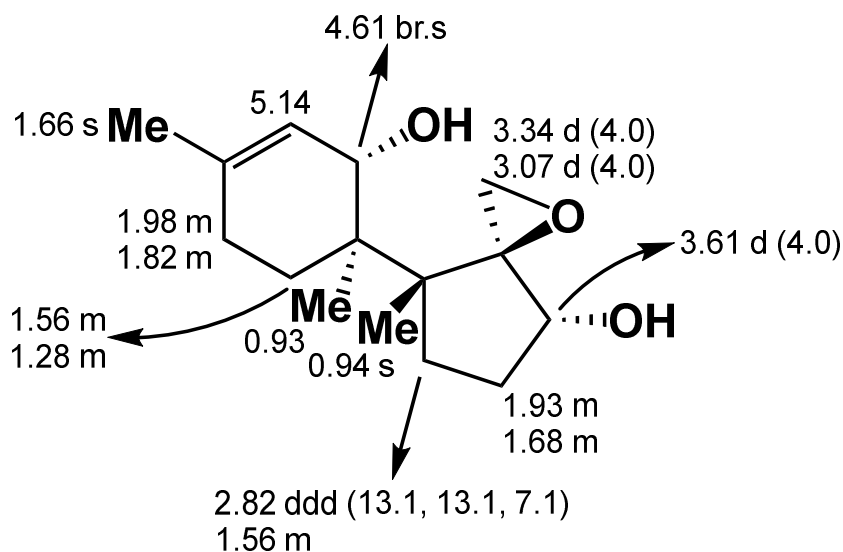

$^{13}\text{C}$  NMR Data of isotrichodiol (151 MHz,  $\text{CDCl}_3$ ) 81.7 (C-2), 30.3 (C-3), 37.1 (C-4), 46.8 (C-5), 41.0 (C-6), 29.2 (C-7), 27.8 (C-8), 130.5 (C-9), 125.5 (C-10), 72.0 (C-11), 69.3 (C-12), 49.5 (C-13), 20.2 (C-14), 13.0 (C-15), and 22.3 (C-16) ppm.

Spot 1 : 7-HIT [ $^1\text{H}$  NMR Data of 7-HIT (600 MHz,  $\text{CDCl}_3$ )]

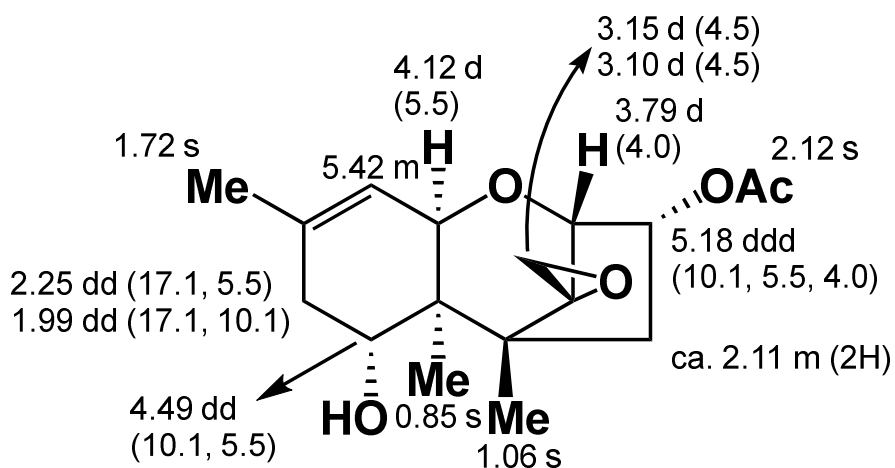

$^{13}\text{C}$  NMR Data of 7-HIT (151 MHz,  $\text{CDCl}_3$ ) 79.0 (C-2), 71.4 (C-3), 41.5 (C-4), 46.2 (C-5), 44.7 (C-6), 69.1 (C-7), 39.6 (C-8), 137.9 (C-9), 119.5 (C-10), 74.7 (C-11), 65.0 (C-12), 47.7 (C-13), 15.1 (C-14), 10.3 (C-15), and 22.5 (C-16) ppm.

Spot 2 : 8-H-15-deCAL [ $^1\text{H}$  NMR Data of 8-H-15-deCAL (600 MHz,  $\text{CDCl}_3$ )]

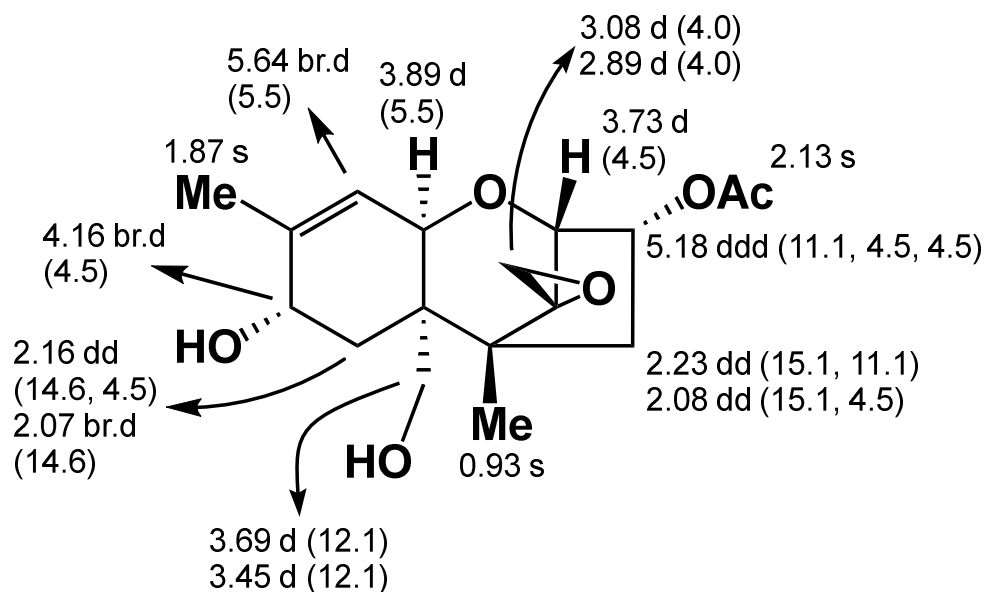

$^{13}\text{C}$  NMR Data of 8-H 15-deCAL (151 MHz,  $\text{CDCl}_3$ ) 77.9 (C-2), 71.3 (C-3), 39.5 (C-4), 45.7 (C-5), 44.0 (C-6), 28.3 (C-7), 67.3 (C-8), 138.8 (C-9), 122.8 (C-10), 68.6 (C-11), 67.0 (C-12), 48.5 (C-13), 12.6 (C-14), 62.7 (C-15), 20.6 (C-16), 21.1, and 170.7 (3-OAc) ppm.

Spot 3 : isotrichotriol [ $^1\text{H}$  NMR Data of isotrichotriol (600 MHz,  $\text{CDCl}_3$ )]

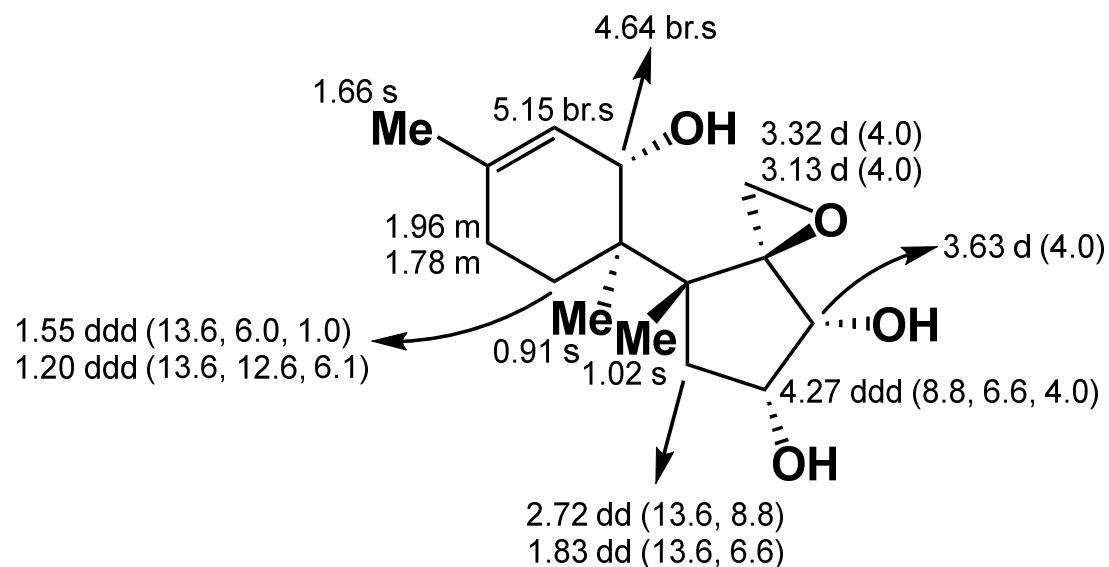

$^{13}\text{C}$  NMR Data of isotrichotriol (151 MHz,  $\text{CDCl}_3$ ) 79.6 (C-2), 70.0 (C-3), 43.5 (C-4), 45.2 (C-5), 41.2 (C-6), 29.1 (C-7), 27.6 (C-8), 135.3 (C-9), 125.3 (C-10), 71.5 (C-11), 67.5 (C-12), 49.3 (C-13), 22.0 (C-14), 13.1 (C-15), and 22.5 (C-16) ppm.

Spot 4 : trichotriol [ $^1\text{H}$  NMR Data of trichotriol (600 MHz,  $\text{CDCl}_3$ )]

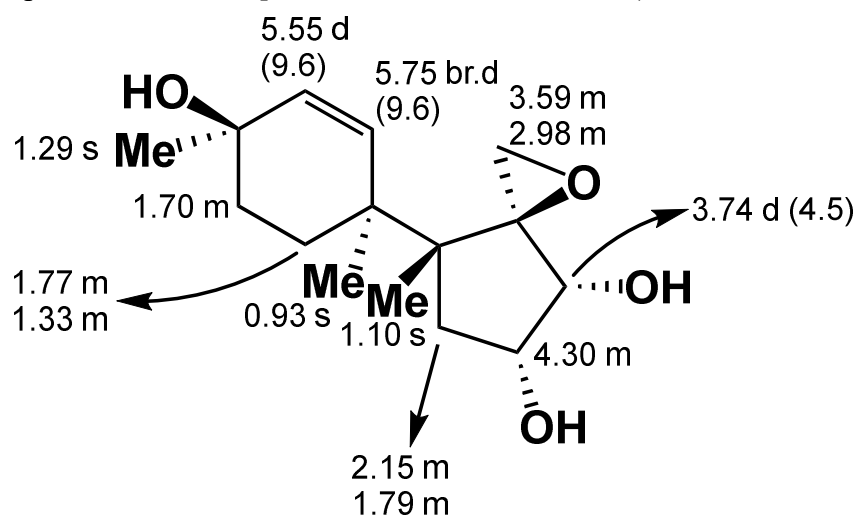

$^{13}\text{C}$  NMR Data of trichotriol (151 MHz,  $\text{CDCl}_3$ ) 77.5 (C-2), 69.0 (C-3), 41.5 (C-4), 43.9 (C-5), 39.5 (C-6), 27.0 (C-7), 34.0 (C-8), 66.5 (C-9), 131.3 (C-10), 136.3 (C-11), 69.2 (C-12), 49.9 (C-13), 20.4 (C-14), 21.3 (C-15), and 30.7 (C-16) ppm.

**Supplementary Figure S3.** Bicyclic precursors and tricyclic trichothecene intermediates of FGD3. (A) TLC analysis of trichothecene metabolites. Spot 1 contained 15-deCAL, isotrichodiol, and 7-HIT. Spots 2, 3, and 4 contained 8-H-15-deCAL, isotrichotriol, and trichotriol, respectively. (B) The compounds in spots 1–4 were confirmed by NMR analyses.

(A) ITDmol  $[M+H]^+$   $m/z$ : 251.164, RT: 3.88 min

Spectrum from 231224\_KY\_TOFposi\_4\_DataSET12.wiff (samp...from 3.835 to 3.972 min Precursor: 251.2 Da, CE: 25.0)

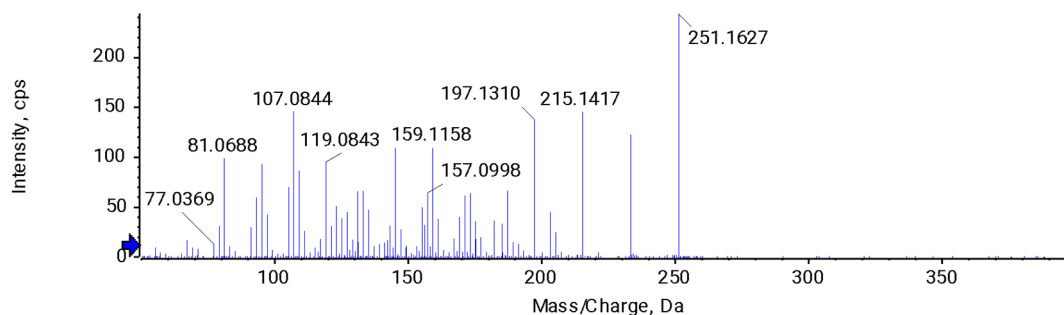

(B) ITD  $[M+H]^+$   $m/z$ : 293.175, RT: 4.95 min

Spectrum from 231224\_KY\_TOFposi\_4\_DataSET13.wiff (samp...from 4.881 to 5.018 min Precursor: 293.2 Da, CE: 25.0)

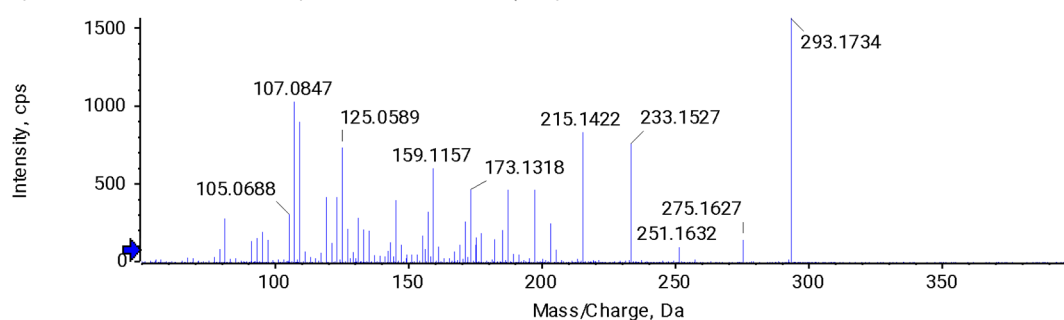

(C-1) 7-HIT  $[M+H]^+$   $m/z$ : 309.170, RT: 3.84 min

Spectrum from 231224\_KY\_TOFposi\_4\_DataSET15.wiff (samp...from 3.787 to 3.899 min Precursor: 309.2 Da, CE: 25.0)

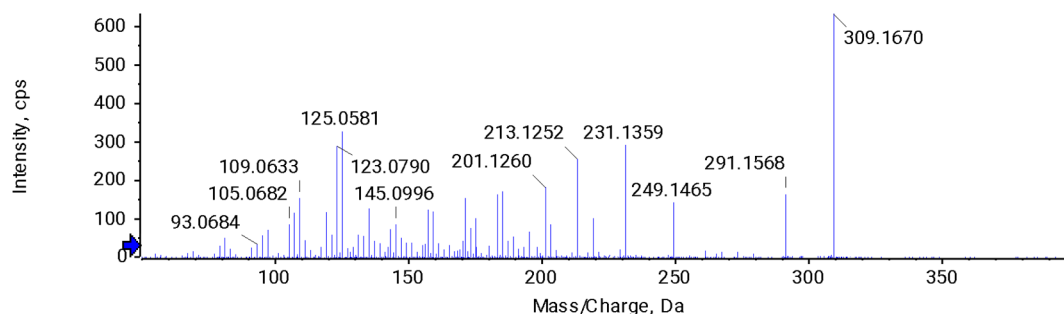

(C-2) 7-HIT  $[M+NH_4]^+$   $m/z$ : 326.196, RT: 3.84 min

Spectrum from 231224\_KY\_TOFposi\_4\_DataSET15.wiff (samp...from 3.788 to 3.908 min Precursor: 326.2 Da, CE: 25.0)

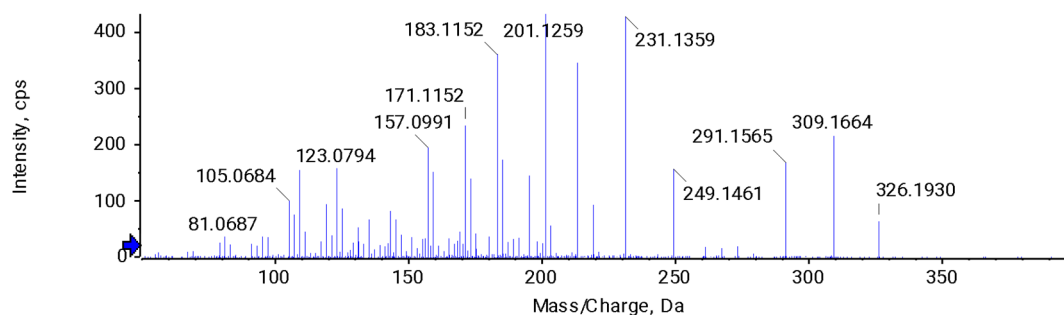



(D-1) 8-HIT  $[M+H]^+$   $m/z$ : 309.170, RT: 3.45 min

Spectrum from 231224\_KY\_TOFposi\_4\_DataSET16.wiff (samp...from 3.394 to 3.505 min Precursor: 309.2 Da, CE: 25.0

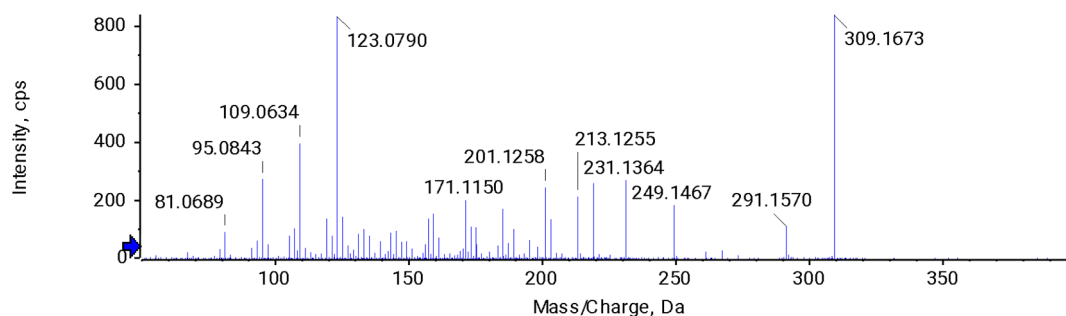

(D-2) 8-HIT  $[M+NH_4]^+$   $m/z$ : 326.196, RT: 3.44 min

Spectrum from 231224\_KY\_TOFposi\_4\_DataSET16.wiff (samp...from 3.403 to 3.506 min Precursor: 326.2 Da, CE: 25.0

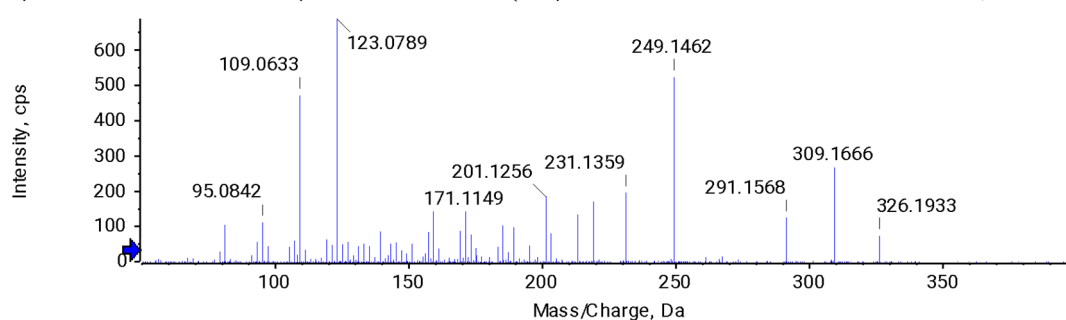

(E-1) 15-deCAL  $[M+H]^+$   $m/z$ : 309.170, RT: 3.55 min

Spectrum from 231224\_KY\_TOFposi\_4\_DataSET112.wiff (sam...from 3.497 to 3.616 min Precursor: 309.2 Da, CE: 25.0

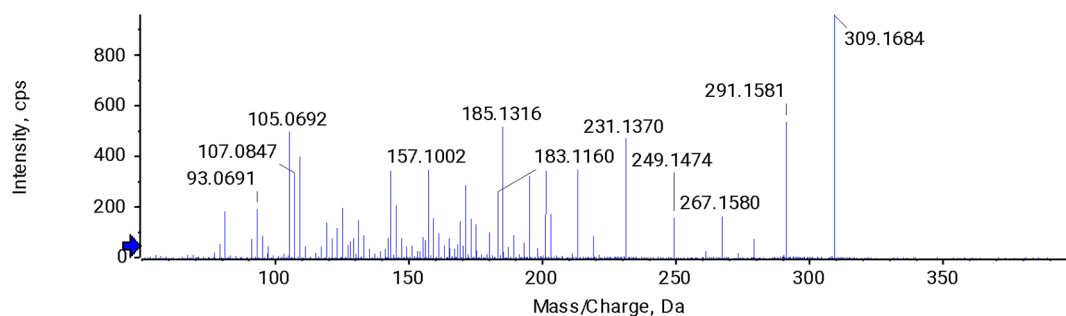

(E-2) 15-deCAL  $[M+NH_4]^+$   $m/z$ : 326.196, RT: 3.54 min

Spectrum from 231224\_KY\_TOFposi\_4\_DataSET112.wiff (sam...from 3.497 to 3.626 min Precursor: 326.2 Da, CE: 25.0

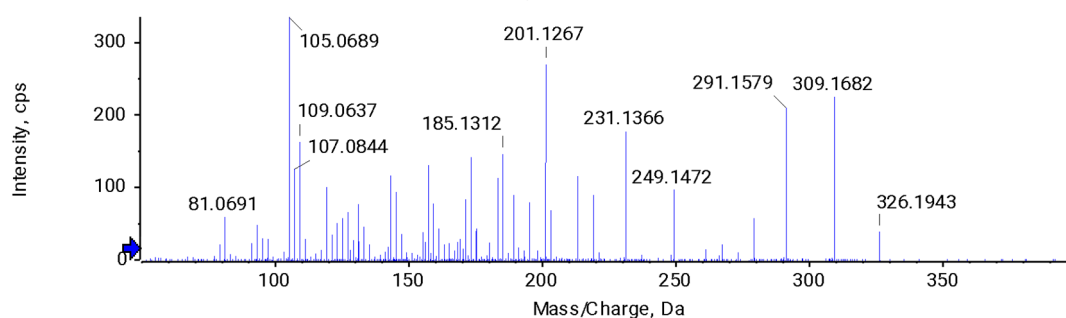

(F) CAL  $[M+NH_4]^+$   $m/z$ : 368.207, RT: 4.41 min

Spectrum from 231224\_KY\_TOFposi\_3\_DataSET17.wiff (samp...from 4.363 to 4.466 min Precursor: 368.2 Da, CE: 25.0)

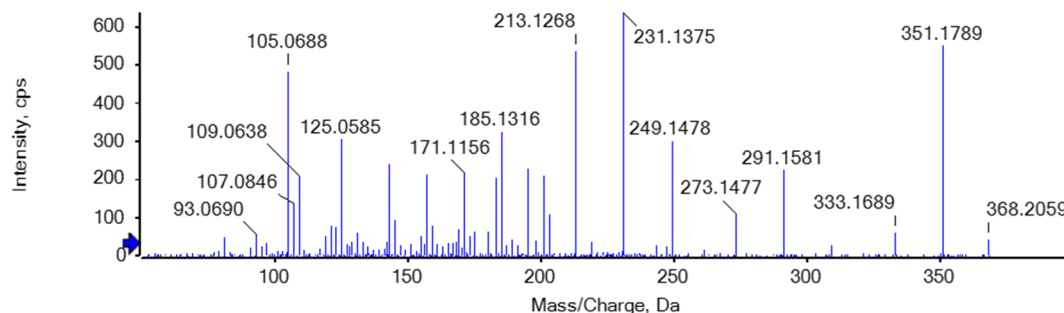

(G) 3-deCAL  $[M+NH_4]^+$   $m/z$ : 326.196, RT: 3.58 min

Spectrum from 231224\_KY\_TOFposi\_4\_DataSET111.wiff (sam...from 3.523 to 3.643 min Precursor: 326.2 Da, CE: 25.0)

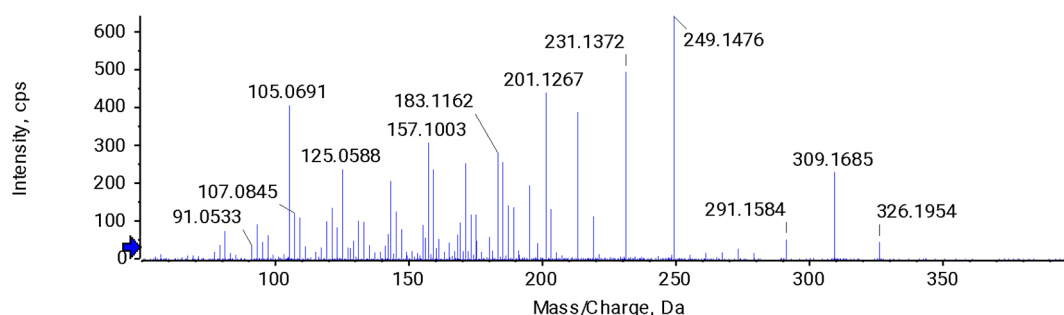

(H) isotrichotriol  $[M+NH_4]^+$   $m/z$ : 286.201, RT: 3.45 min

Spectrum from 230614\_KY\_TOFposi\_3\_DataSET117.wiff (sam...from 3.380 to 3.563 min Precursor: 286.2 Da, CE: 25.0)

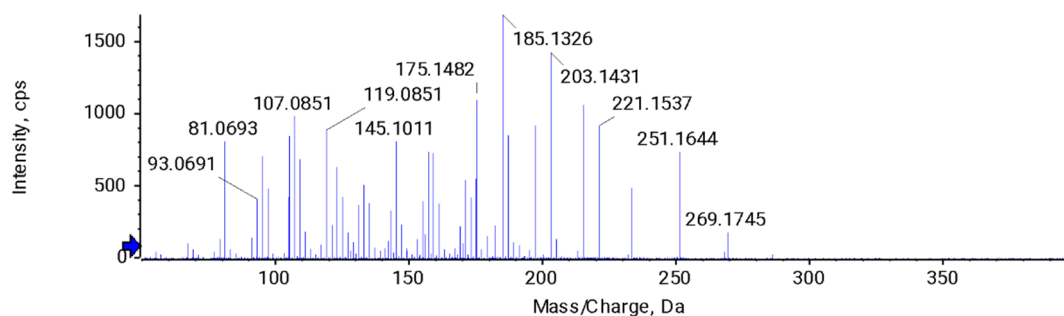

(I) trichotriol  $[M+NH_4]^+$   $m/z$ : 286.201, RT: 3.04 min

Spectrum from 230614\_KY\_TOFposi\_3\_DataSET120.wiff (sam...from 2.979 to 3.149 min Precursor: 286.2 Da, CE: 25.0)

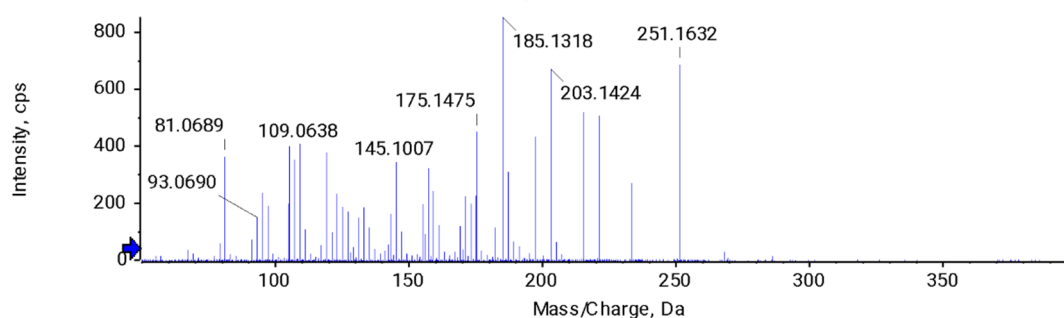

(J) 3-deacetyl-7-hydroxyisotrichodermin (3-de-7-HIT)  $[M+H]^+$   $m/z$ : 267.159, RT: 2.80 min

Spectrum from 231224\_KY\_TOFposi\_4\_DataSET18.wiff (samp...from 2.745 to 2.865 min Precursor: 267.2 Da, CE: 25.0)

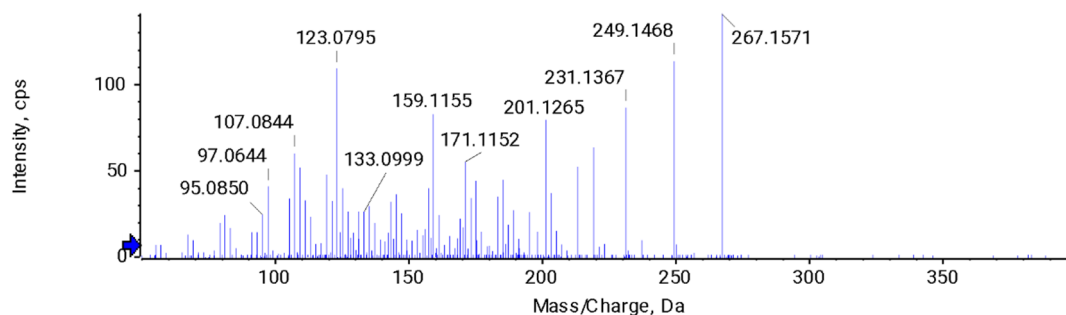

(K) 3-deacetyl-8-hydroxyisotrichodermin (3-de-8-HIT)  $[M+NH_4]^+$   $m/z$ : 284.186, RT: 2.48 min

Spectrum from 231224\_KY\_TOFposi\_4\_DataSET19.wiff (samp...from 2.412 to 2.541 min Precursor: 284.2 Da, CE: 25.0)

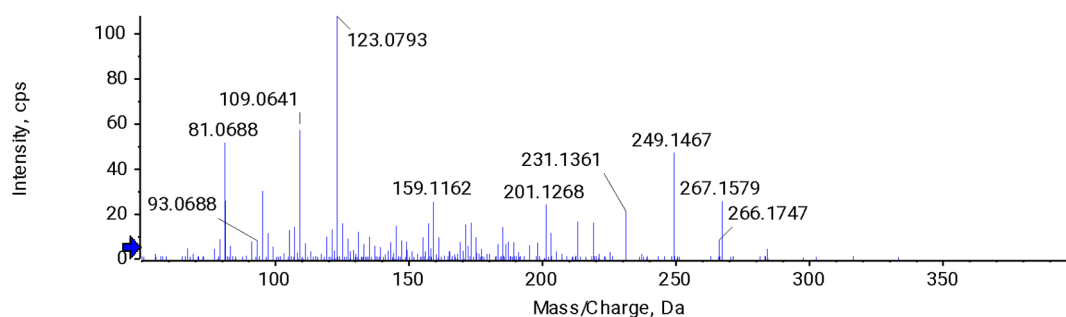

(L) 7-H-15-deCAL (NX-2)  $[M+NH_4]^+$   $m/z$ : 342.191, RT: 3.15 min

Spectrum from 230812\_KY\_TOFposi\_2\_DataSET16.wiff (samp...from 3.118 to 3.222 min Precursor: 342.2 Da, CE: 25.0)

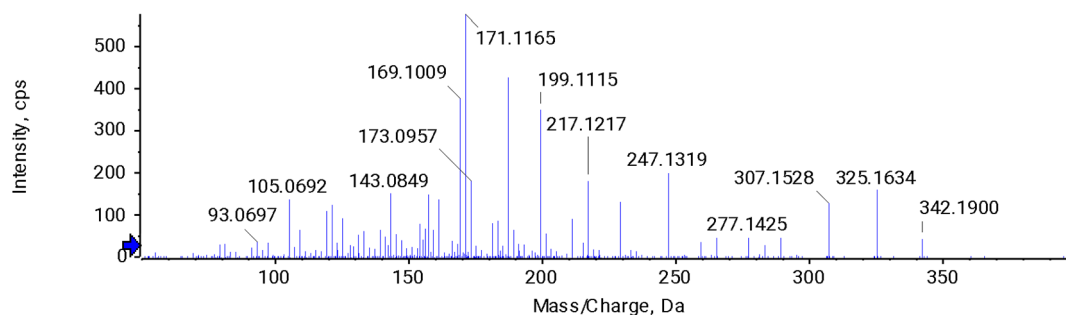

(M) 8-H-15-deCAL  $[M+NH_4]^+$   $m/z$ : 342.191, RT: 3.10 min

Spectrum from 231224\_KY\_TOFposi\_5\_DataSET19.wiff (samp...from 3.035 to 3.155 min Precursor: 342.2 Da, CE: 25.0)

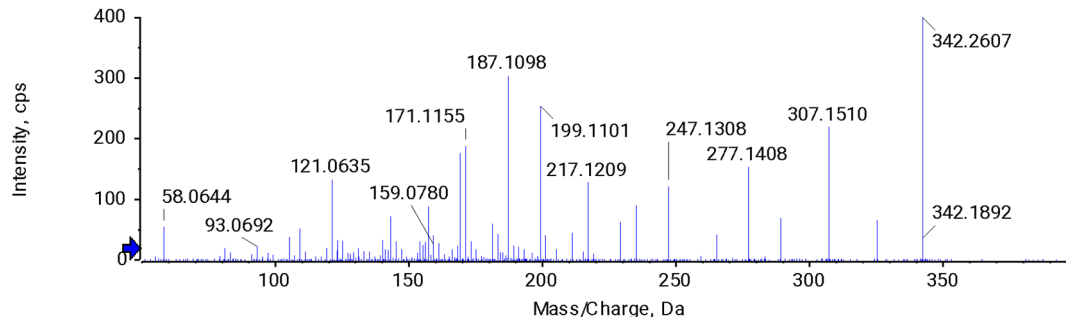

(N) isotrichodiol  $[M+NH_4]^+$   $m/z$ : 270.206, RT: 4.11 min

Spectrum from 231224\_KY\_TOFposi\_5\_DataSET15.wiff (samp...from 4.043 to 4.189 min Precursor: 270.2 Da, CE: 25.0)

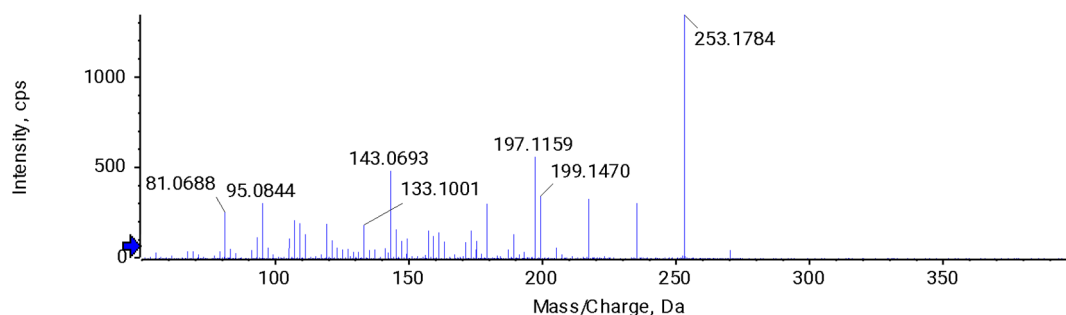

(O) 3,15-dideacetylcalonecitrin (3,15-dideCAL)  $[M+NH_4]^+$   $m/z$ : 284.186, RT: 2.77 min

Spectrum from 230626\_KY\_TOFposi\_1\_DataSET12.wiff (samp...from 2.713 to 2.822 min Precursor: 284.2 Da, CE: 25.0)

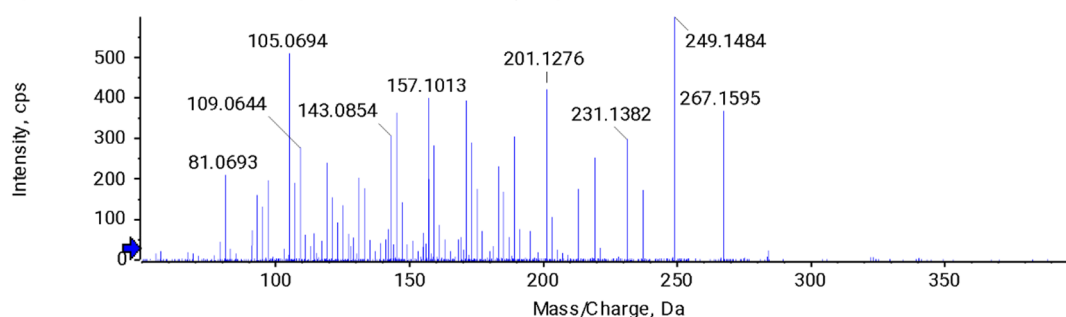

(P) DON  $[M+NH_4]^+$   $m/z$ : 314.160, RT: 2.29 min

Spectrum from 231107\_KY\_TOFposi\_2\_DataSET12.wiff (samp...from 2.258 to 2.389 min Precursor: 314.2 Da, CE: 25.0)

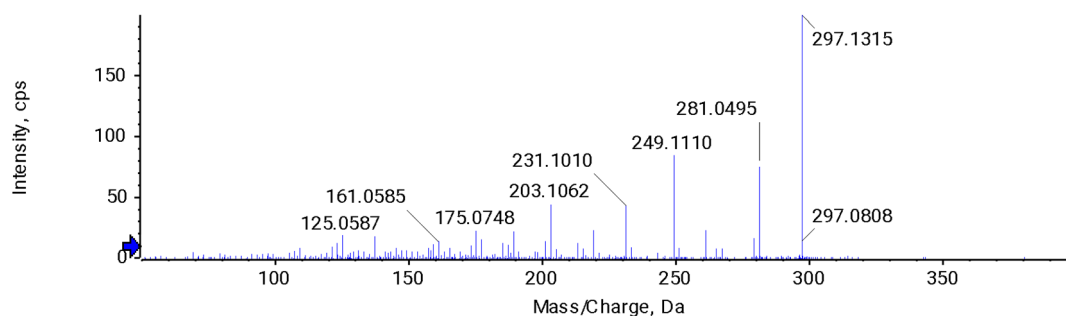

(Q) 3-ADON  $[M+H]^+$   $m/z$ : 339.144, RT: 3.10 min

Spectrum from 231107\_KY\_TOFposi\_2\_DataSET13.wiff (samp...from 3.068 to 3.205 min Precursor: 339.1 Da, CE: 25.0)

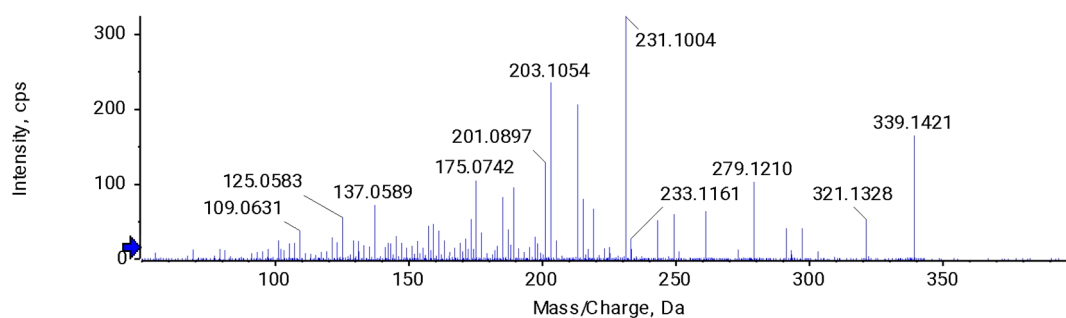

**(R) 15-ADON [M+NH<sub>4</sub>]<sup>+</sup> *m/z*: 356.170, RT: 3.05 min**

Spectrum from 231107\_KY\_TOFposi\_2\_DataSET14.wiff (samp...from 2.994 to 3.131 min Precursor: 356.2 Da, CE: 25.0)

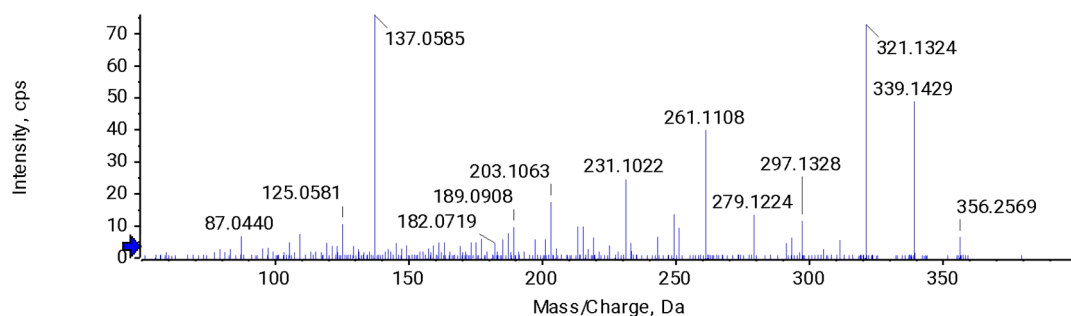

**(S) 3,15-diADON [M+NH<sub>4</sub>]<sup>+</sup> *m/z*: 398.181, RT: 3.84 min**

Spectrum from 231224\_KY\_TOFposi\_3\_DataSET15.wiff (samp...from 3.788 to 3.925 min Precursor: 398.2 Da, CE: 25.0)

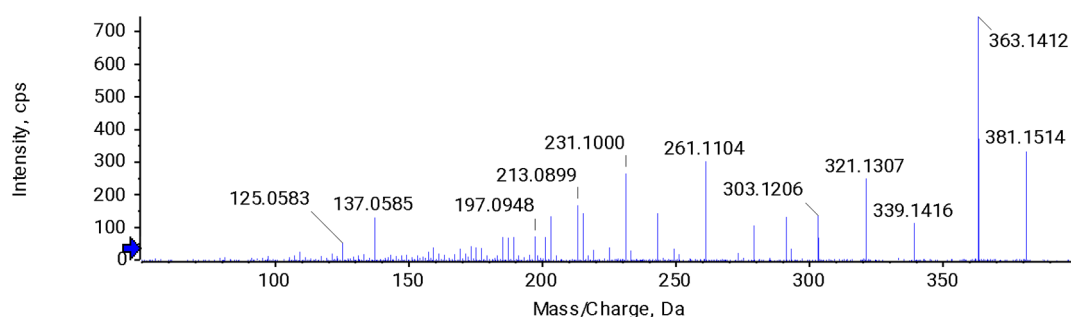

**Supplementary Figure S4.** MS/MS spectra of 16 tricyclic and 3 bicyclic trichothecenes and shunts. The purified samples were applied to LC-MS, and their MS/MS spectra were obtained in the positive ion mode, using the TOF-MS methods.

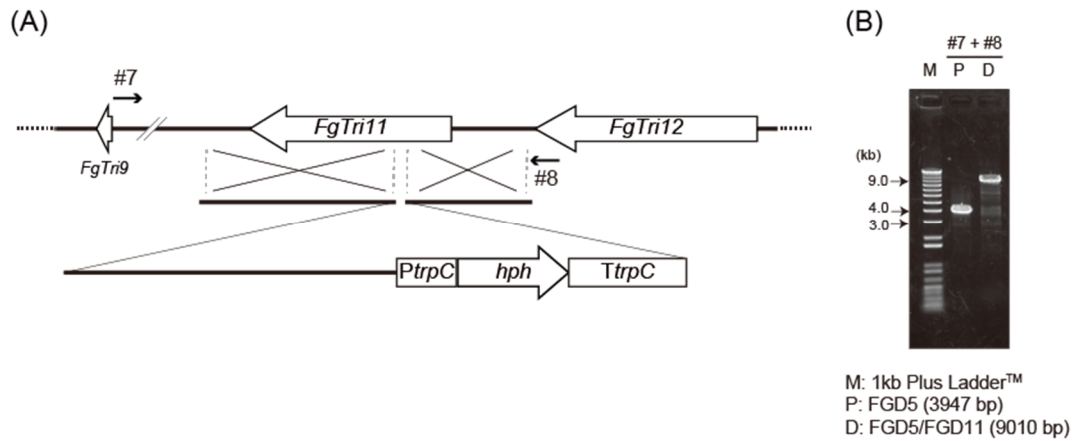

**Supplementary Figure S5.** Generation of a  $\Delta Fgtri5\Delta Fgtri11$  (FGD5/11) disruption mutant used in this study. (A) The *FgTri11* gene disruption vector [7] that contains the *hph* (hygromycin B phosphotransferase gene) cassette was transformed into FGD5 mutant strain [8]. After transformation, colonies were selected with 300  $\mu\text{g/ml}$  of hygromycin B. (B) PCR confirmation of genomic DNA isolated from the FGD5 and FGD5/FGD11 mutant strains. Primers #7 and #8 were used to amplify the region encompassing *FgTri11*. An amplicon from the double disruption mutant is 5.0 kb larger than that from its parent FGD5.

(A)

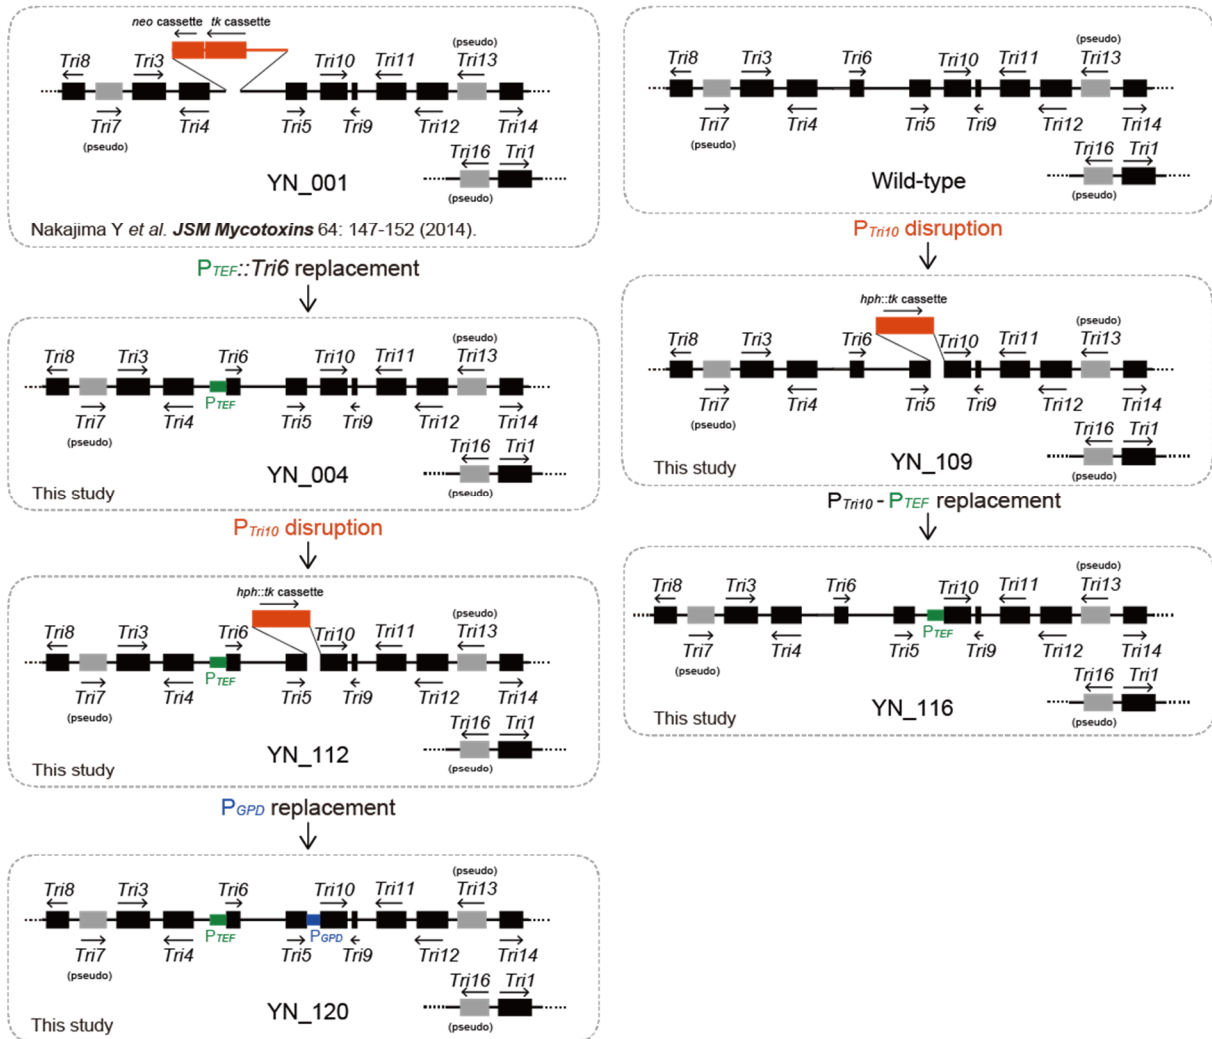

(B)

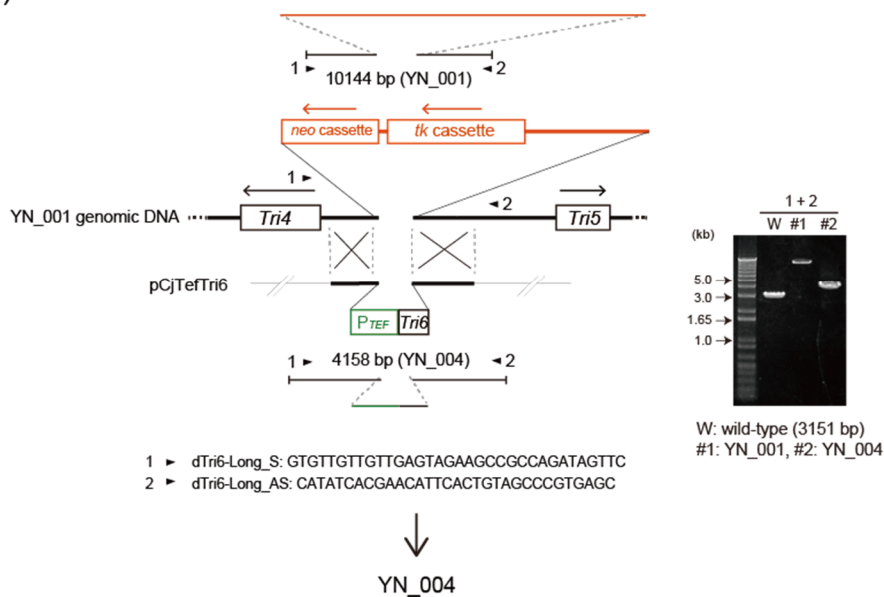

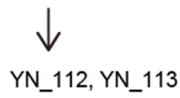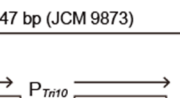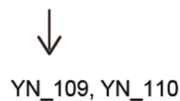



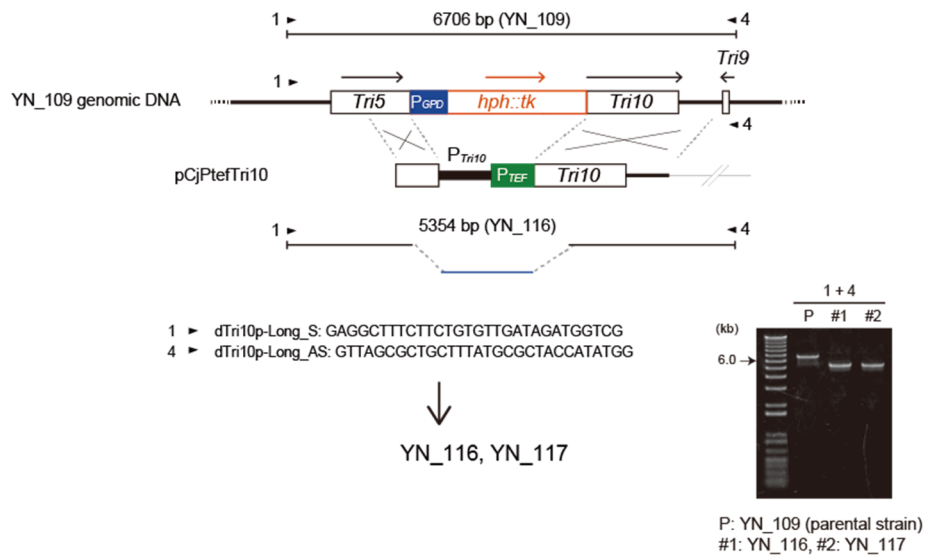

(C)

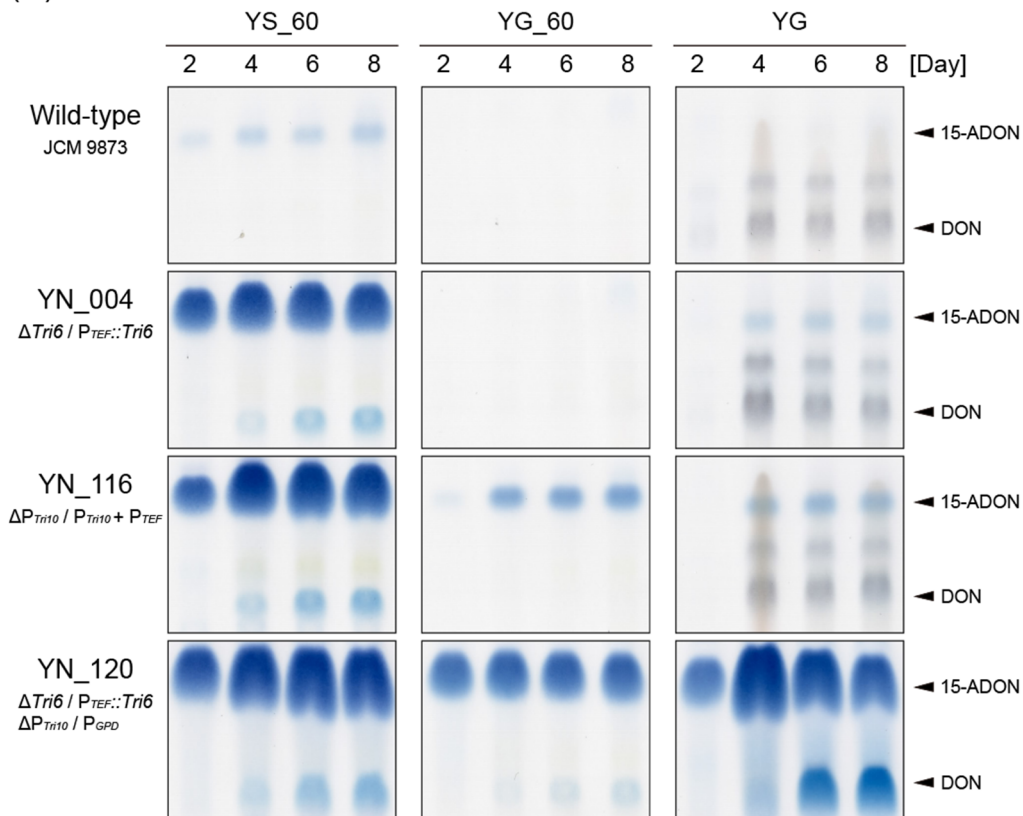

(D)

|     |            |            |            |            |             |            |            |            |            |            |
|-----|------------|------------|------------|------------|-------------|------------|------------|------------|------------|------------|
| 1   | TCGCGCTTT  | CGGTGATGAC | GSTGAAACC  | TCTGACACAT | GCAGCTCCCG  | GAGACGTC   | CAGCTGTCT  | GTAAAGCGAT | GCCGGGAGCA | GACAAAGCCG |
| 101 | TCAGGCGCG  | TCAGCGGGTG | TTGGCGGGTG | TCGGGCGTGG | CTTAACATATG | CGGCATCAGA | GCAGATTGTA | CTGAGAGTGC | ACCATATGCG | GTGTGAAATA |
| 201 | CCGCACAGAT | GCGTAAAGAG | AAATACCGC  | ATCAGGCGCC | ATTCCGCATT  | CAGGCTGCGC | AACTGTTGGG | AAGGGCGATC | GGTGCGGGCC | TCTTCGCTAT |
| 301 | TACGCCACST | GGCGAAGGG  | GGATGTGCTG | CAAGGCGATT | ANGTTGGTA   | ACGCGAGGT  | TTTCCGATC  | ACGACGTTGT | AAACGACGG  | CCAGTGAATT |

CjTri6pro\_5

|      |  |                                                                                                                                                                               |  |
|------|--|-------------------------------------------------------------------------------------------------------------------------------------------------------------------------------|--|
|      |  | CjTri6pro_S                                                                                                                                                                   |  |
|      |  | Tri6 upstream region                                                                                                                                                          |  |
| 401  |  | CGAGCTCGGT ACCCAGGTAC CTGTCTATC GCGTCTCTAG AGTGCCTTGC ATGCGTTGTG GCGGTAAAGC CTCACAACTC TGAAGTTGTC CTCAGTATCG                                                                  |  |
|      |  | Tri6 upstream region                                                                                                                                                          |  |
| 501  |  | CCGTGTGAGA TAGGCTTCGC AAGAGTGTCC GGTCCGAAAC TCACCAATCA ACTCAGCAGG ATGAACAAGG GGTCTGAAGG GCCTGSCAGG CCTGACAGGA                                                                 |  |
|      |  | Tri6 upstream region                                                                                                                                                          |  |
| 601  |  | GTGATAAAT GTGAGAGAG ATATGCCAT ACAACCTGT AMCTTGTGAA ACSSGSCATG GAATCCCATG GCAAGTTATG GSGTCAGCAG CAACTGAAAT                                                                     |  |
|      |  | Tri6 upstream region                                                                                                                                                          |  |
| 701  |  | GCTACAGGT CAGAAGTGC ATCTTTTAC CGGCGSCTTA TCCGAAGTTG CTGCCATCA GATACAGACA TGATGAGAGA GTGATACGAC TCGCGCGAAG                                                                     |  |
|      |  | Tri6 upstream region                                                                                                                                                          |  |
| 801  |  | AATAAGATC ATCAGTSCGC CGCAATGTTA AAACTGATG TCGCGAAGCA ACATTAGCT TTGAGGAGCAT GCCAGGGTCT TGCTCGAAA TATCTTTGTC                                                                    |  |
|      |  | Tri6 upstream region                                                                                                                                                          |  |
| 901  |  | TACCGAGCC CATGATGTT CAAAGTATG TACATGATG GTCTTGACA GAGACAGCC TCGAGTGTTA TCGAGACTGT CAGGCTGCA GTAAGTTGCC                                                                        |  |
|      |  | Tri6 upstream region                                                                                                                                                          |  |
| 1001 |  | ACAGACTGA ATCGATTATC ATTGACGTT CGGAAGCGCT CTGTTAGGAA TCTTTCTAGA CCAACTAC CACTTTGACA TCTGATACT AACACTAGTA                                                                      |  |
|      |  | Tri6 upstream region                                                                                                                                                          |  |
| 1101 |  | GCACATAGT AAACCTTCA CTGCGCGCG ATCAACTGT AAACAGGTAC CGGCGAGCG GTCTGGGATA AGATACCTT TTAACTGCC GTAGCAACT                                                                         |  |
|      |  | Tri6 upstream region                                                                                                                                                          |  |
| 1201 |  | GTAATTGTC GTACTTCTG GACATATTT TCATGGCTT CAGAGGCTT CACTTTAAT AAACCTGAT CTGATAGGA AACTTTATCA ATCGTATCCC                                                                         |  |
|      |  | TEF promoter                                                                                                                                                                  |  |
|      |  | CjTefjTri6_S                                                                                                                                                                  |  |
|      |  | Tri6 upstream region                                                                                                                                                          |  |
| 1301 |  | ATCCCATGA GGCCTAAGCC ATCTTTTAT TTTTATTTT TGATCGCCA ACCATATAT TGACATCTA TTTTGACTAC CCTCGAATG CGACTTAGAG                                                                        |  |
|      |  | jT6Cpro_AS                                                                                                                                                                    |  |
|      |  | CjTefjTri6_S                                                                                                                                                                  |  |
|      |  | TEF promoter                                                                                                                                                                  |  |
| 1401 |  | TGACGCTCA AAGATACCC CTAACTCTG ATTTGATAG ATTTGATAT GGCATATAG ACSCCTGAG CATAAAAA AAACAGAT TATTATAGT                                                                             |  |
|      |  | TEF promoter                                                                                                                                                                  |  |
| 1501 |  | TATTATAGC AGACAGAGA ATACCGCCC AAGTTAGCC TTTGTGCTGA TCATGCTCTC GAACGGCCA AGTTCGGAA AAGCAAGGA GCGTTTAGTG                                                                        |  |
|      |  | TEF promoter                                                                                                                                                                  |  |
| 1601 |  | AGGGCAATT TGACTCACT CCCAGCGAC AGATGAGGG GSCAAAAGA AAGAAATTT CGTGAGTCAA TATGGATTCC GAGCATCAT TTCTTGCGGT                                                                        |  |
|      |  | TEF promoter                                                                                                                                                                  |  |
| 1701 |  | CTATCTGCT AGTATGTTG ATCTTGAGC TGTGATCAA GCAAGCCAC TCGCTCGCTC GATCGAGGC TGSTCGAGA CAATTAAAA GSCGCGAAC                                                                          |  |
|      |  | TEF promoter                                                                                                                                                                  |  |
| 1801 |  | TCGTACGCC CGGGGTTGT CCCTCGAAA GTACAGAGT ATAAAAAGC CCATCGACC ATCAACGCGT TGATGCCAG CTTTTGAT CCGAGAAATC                                                                          |  |
|      |  | TEF promoter                                                                                                                                                                  |  |
| 1901 |  | ACCGTAGAG CGATAGCAG TAAAGAAAG CTAACAATA AAAATTCTT GCCCTAAGC CATGAAGAG AGATGGGTG GAGCAGACC AAGGAAGAG                                                                           |  |
|      |  | TEF promoter                                                                                                                                                                  |  |
| 2001 |  | TCGCGCTGG GCGCGTTCC GGAAGTGTT GTAAAGSCTC GAGCGCCAG GTGGAGTCT AAGAGAGGA TTTGCATCG GAGTGGGCG GGTACCCCT                                                                          |  |
|      |  | TEF promoter                                                                                                                                                                  |  |
| 2101 |  | CCATATCAA TGACAGATAT CTACAGCCA AGGGTTTGA CCCGCCGCT TAGTGTGCT CCGCTTGC CCCTCATAA AAGGATTCCC CCGCCCTC                                                                           |  |
|      |  | TEF promoter                                                                                                                                                                  |  |
| 2201 |  | CCACAAAT TTTCTTCCCT TCCTCTCCT GTCCGCTCA GTACGTATAT CTCCCTTCC CTGCTTCTC TCCTCATCC TTTTTCATC CATCTCTGC                                                                          |  |
|      |  | TEF promoter                                                                                                                                                                  |  |
|      |  | Tri6                                                                                                                                                                          |  |
|      |  | jT6C_S                                                                                                                                                                        |  |
|      |  | M I                                                                                                                                                                           |  |
| 2301 |  | TAACTTCT GCTCAGACC TCTACGATT ACTAGCGTA GTATCTGAG ACTTCTCCCT TTTATATCC ACAAACATA ACACACCTT CACCATATT                                                                           |  |
|      |  | CjTefjTri6_AS                                                                                                                                                                 |  |
|      |  | jT6C_S                                                                                                                                                                        |  |
|      |  | Tri6                                                                                                                                                                          |  |
| 2401 |  | Y H E A E S H Y E S W S A L P L F D R V A S P D P A K D F V P D L N<br>TACATGAGG CGGAATCTCA CTACGAATCT TGAAGCGCT TCGCCCTCT TGAATGAGT GCGTCTCCG ATCTCGCAA GGAATTTGT CCAATCTAA  |  |
|      |  | CjTefjTri6_AS                                                                                                                                                                 |  |
|      |  | Tri6                                                                                                                                                                          |  |
| 2501 |  | N D Y E S P T F E I D L L S E T Y D F D N F P T Y S L P T V D S T K<br>ACGACTTGA ATACAGACA TTGAAATAG ATCTTCTCT AGAATCTTAT GACTTTGACA ACTTCCACC ATACTCTCTA CCAAGGTGG ATTCAGCAA |  |
|      |  | Tri6                                                                                                                                                                          |  |
| 2601 |  | K T L Y S E E P L V C F D F D F A N P A I E N Y I T T S S G L L D A<br>GACTTTGAT TCGAAGAAC CACTTGTGT CTTGACTTT GACTTCGCA ACCCGCTAT CGAAATATAT ATACACAT CTTGAGACT GTTGAGCGA    |  |
|      |  | Tri6                                                                                                                                                                          |  |
| 2701 |  | V P S Q L I A L P T F T R P S K C P F P S C K S A T V F E S G R D F<br>GTCCAGGCC AGCTTATGC CTTTCCACC TTACAGAGC CAAGCAATG CCAATCCCT AGTTGCAAGT CCGCCACAGT CTTTGAAGC GAGCGGACT  |  |
|      |  | Tri6                                                                                                                                                                          |  |
| 2801 |  | F R R H Y R Q H F K R F F C R Y S E C P Q S A Q D L Q E V G T K G F<br>TTAGCGGCA TTACGECOA CACTTCAAG GCTTTTCTG TCGCTACTCA GAATGCCCTC AGTCAGTCA AGACTGCAA GAGTCCGCA CCAAGGCTT  |  |
|      |  | Tri6                                                                                                                                                                          |  |
| 2901 |  | F A T R K D R A R H E S K H K P T V R C P W Q D K E G Q Q C L R V F<br>TGCGATGCG AAGGAGCTG CTGCGATGA GTCTAAGCAC AAACCAAGC TGCGGTGCC TTGCGAGAC AAGGAGGAC AACATGTCT GAGGCTTTT   |  |
|      |  | Tri6                                                                                                                                                                          |  |
| 3001 |  | S R V D N M R D H Y R R I H K C *<br>AGCAGGTGG ATAACTGCG AGATCACTAT AGGCGGATC ATAGTGTG ACAGGAGATC GGTGTGAAA ACTGAGATA GTTACTATA AAAGCAACA                                     |  |
|      |  | Tri6 downstream region                                                                                                                                                        |  |
| 3101 |  | TTTGGAAAA TCAATAACA TATCCGATA AATATCCAT TAGACTTTT GAGTTTATA AATGATGAG AGTTTGGCG CGATCGATG TGTTCAGC                                                                            |  |
|      |  | Tri6 downstream region                                                                                                                                                        |  |
| 3201 |  | ACCAATCAT AATATACTC ATAGTAGCG AGACCTGCA GCTCATGTT ACCAGCCCTG TTTTATTGC ACAATTAGT ACATCTATT CTGACAGCA                                                                          |  |
|      |  | Tri6 downstream region                                                                                                                                                        |  |
| 3301 |  | CTACAGGCT TTCAACTT ACATATTGC TCTAGCGTG GCTGTGCTA AGCAGATCA GCGCGTAT TGTATTGCT GCGTGTCTT GCGCCGATC                                                                             |  |
|      |  | Tri6 downstream region                                                                                                                                                        |  |
| 3401 |  | GTCCAGAAC AATCTGGCA CTGCAAGTA TTTGCGGCG CTGGTAAAT TCTTTAGTA GTCTGCTCA TTTGGCAGT GCAATAATA TATTTACC                                                                            |  |
|      |  | Tri6 downstream region                                                                                                                                                        |  |
| 3501 |  | GCGTTGCT GCGCATGTA CCAAAAGC TTCAATATA TCTGCGCAT ATCGTTACT CGGTTCCAG TTTACAGCA TACGCTCTC GTATCAATG                                                                             |  |

|                        |            |             |            |            |            |            |            |            |            |            |
|------------------------|------------|-------------|------------|------------|------------|------------|------------|------------|------------|------------|
| 3601                   | CCCAACAAA  | CATACGTAT   | TGGTACTAT  | GCCGGTTTC  | CCCGAACAT  | TGCTGTCCG  | CAAAAGGATG | CATCGGACT  | CTAAAGATTG | CGATCTGTG  |
| Tri6 downstream region |            |             |            |            |            |            |            |            |            |            |
| 3701                   | TTAGAGGCTG | ACTTGAAGTCA | AGAAGTAGCG | TAACAGTGA  | GATAATGAA  | TTAATTACCT | GAGGCAATT  | TAAGGTTTCA | ACCTCCGAGG | AAAGCCATTG |
| Tri6 downstream region |            |             |            |            |            |            |            |            |            |            |
| 3801                   | GTGCTGGAT  | ATAATCTGCA  | ATAGGTTAGG | CTTTCGTGT  | TTTTTCGGAG | CATTGTGAC  | TGTTTTGGAT | TGTGTCTTTG | GGGTCTTTT  | GCCTTCAAGG |
| Tri6 downstream region |            |             |            |            |            |            |            |            |            |            |
| 3901                   | CTGCTGAGT  | TGCAAGGAAC  | GAGTCAGTCA | CGGCAAGGAC | TGAGTCAAC  | ACTGTTTCGT | AATAATCATG | ATTGTTGTT  | GCAAAATTC  | AACGAAGCTT |
| Tri6 downstream region |            |             |            |            |            |            |            |            |            |            |
| 4001                   | TGCGCGTCA  | GTCAAATTCG  | CACAGTCTGA | TACTTTTTC  | TGGCATTGGC | CCAGTATTC  | TCCATGAGTG | GCTGAACGCT | AGTTGATTCT | CAAGTCCAAC |
| Tri6 downstream region |            |             |            |            |            |            |            |            |            |            |
| 4101                   | CCCTAATG   | CCCGGCGGAA  | TGAGAGCTTT | TGCGGTGTCT | GTAGCCGAGA | TGTGATAGT  | AACGGTAACC | CTAGTCAAT  | GAGAGCTGGG | CAGGTTTCAT |
| Tri6 downstream region |            |             |            |            |            |            |            |            |            |            |
| 4201                   | GGTGTGTGA  | CTGTGTTCAT  | CAGATGTTG  | ATGCGGTGA  | CCTACGGAT  | ACCATCTTTC | ACATGTATT  | GTTCACACC  | CAGTGGCTA  | TACCAACATC |
| Tri6 downstream region |            |             |            |            |            |            |            |            |            |            |
| 4301                   | CGCTGTATAT | TCATTGGTTG  | GCTTTATATA | TTGATACAGG | TAATTTCAAG | ATCCGAGGCG | GGATTTCTC  | TGTCGATCA  | GAGAGATGCT | CTCGGATCC  |
| jT6Cter_AS             |            |             |            |            |            |            |            |            |            |            |
| 4401                   | TCTAGAGTCG | ACCTGCAGGC  | ATGCAAGCTT | GCGCTAATCA | TGGTCATAGC | TGTTCTCTGT | GTGAAATTGT | TATCCGCTCA | CAATTCCACA | CAACATACGA |
| jT6Cter_AS             |            |             |            |            |            |            |            |            |            |            |
| 4501                   | GCCGGAAGCA | TAAAGTGTAA  | AGCTTGGGT  | GCCTAATGAG | TGAGCTAATC | CACATTAATT | CGTTTGGCT  | CAGTGCCTGC | TTTCCAGTGC | GGAAACCTGT |
| 4601                   | CGTGCCAGCT | GCATTAATGA  | ATCGGCCAAC | GCGCGGGGAG | AGCGGTTTGG | CGATTGGGG  | GCCTTCCGC  | TTCTCTGCTC | ACTGACTCGC | TGCGCTCGGT |
| 4701                   | CGTTGGGCTG | CGCGAGCGG   | TATCAGCTCA | CTCAAGGCG  | GTAAACGGT  | TATCCACAGA | ATCAGGGGAT | AACGACAGAA | AGACATGTTG | AGCAAAAGGC |
| 4801                   | CAGCAAAAG  | CCAGAACCG   | TAAAAGGCC  | CGCTTGGTG  | CGTTTTTCCA | TAGGCTCCGC | CCCCCTGAGC | AGCATCACAA | AAATCGAGCG | TCAAGTCAGA |
| 4901                   | GGTGCGGAA  | CCGACAGGA   | CTATAAAGT  | ACCAAGCGTT | TCCCCCTGGA | AGCTCCCTCG | TGCGCTCTCC | TGTTCCGACC | CTGCGGCTTA | CCGGATACCT |
| 5001                   | GTCCGCTTT  | CTCCCTTGGG  | GAGCGTGGC  | GCTTTCTCAA | TGCTCAGCT  | GTAGGTATCT | CAGTTGGGTG | TAGGTGTTTC | GCTCCAGCT  | GGGCTGTGTG |
| 5101                   | CACGACCCC  | CGGTTGAGC   | CGAGCGCTGC | GCTTATCCG  | GTAACTATCG | TCTGAGTCC  | AACCGGTTAA | GACAGACTT  | ATCGGCACTG | GACGACGCCA |
| 5201                   | CTGTAGAAC  | GATTAGCAGA  | GCGAGGTATG | TAGGCGGTGC | TACAGAGTTC | TTGAAGTGGT | GGCCTAACTA | CGGCTACACT | AGAAGACAG  | TATTTGGTAT |
| 5301                   | CTGCGCTCTG | CTGAAGCCAG  | TTACCTTCGG | AAAAAGGTT  | GGTAGCTCTT | GATCCGGCAA | ACAAACCAAC | GCTGGTAGCG | GTGGTTTTTT | TGTTTGCAG  |
| 5401                   | CAGCAGATTA | CGCGAGAAA   | AAAGGATCT  | CAAGAAGATC | CTTTGATCTT | TTTACGGGGG | TCTGACGCTC | AGTGGAGCGA | AAACTCAGCT | TAAGGATTAT |
| 5501                   | TGCTCATGAG | ATTATCAAAA  | AGATCTTCA  | CTAGATCCCT | TTTAAATTAA | AAATGAAGTT | TTAAATCAAT | CTAAAGTATA | TATGAGTAAA | CTTGCTCTGA |
| 5601                   | CAGTTACCAA | TGCTTAATCA  | GTAGGCGACC | TATCTCAGCG | ATCTGTCTAT | TTGTTTCATC | CATAGTTCCT | TGACTCCCGG | TCGTGTAGAT | AACTACGATA |
| bla                    |            |             |            |            |            |            |            |            |            |            |
| 5701                   | CGGAGGGCT  | TACCATCTGG  | CCCGAGTCT  | GCAATGATAC | CGCGAGACCC | ACGCTCACCG | GCTCCAGATT | TATCAGCAAT | AAACGAGCCA | GCCCGAAGGG |
| bla                    |            |             |            |            |            |            |            |            |            |            |
| 5801                   | CCGAGCGCAG | AAGTGGTCT   | GCAACTTAT  | CCGCTCCAT  | CCAGTCTATT | AATTGTGCTC | GGGAAGCTAG | AGTAAGTAGT | TGCGCAGTTA | ATAGTTTGGG |
| bla                    |            |             |            |            |            |            |            |            |            |            |
| 5901                   | CAAGCTGTT  | GCCATTGCTA  | CAGGCATCGT | GGTGTACGCG | TGCTGCTTGG | GTATGGCTTC | ATTGAGCTCC | GGTTCCCAAC | GATCAAGGCG | AGTTACATGA |
| bla                    |            |             |            |            |            |            |            |            |            |            |
| 6001                   | TCCCCATGT  | TGTGCAAAA   | AGCGGTTAGC | TCCTTGGCTC | CTCCGATCGT | TGTGAGAGT  | AGTTGGGCGG | CAGTGTATC  | ACTCATGTT  | ATGGCAGCAC |
| bla                    |            |             |            |            |            |            |            |            |            |            |
| 6101                   | TGCATAATC  | TCTTACTGTC  | ATGCCATCCG | TAAGATGCTT | TTCTGTGACT | GGTAGTACT  | CAACCAAGTC | ATTCTAGAAA | TAGTGTATGC | GGCGACCGAG |
| bla                    |            |             |            |            |            |            |            |            |            |            |
| 6201                   | TTGCTCTTGC | CCGCGCTCAA  | TACGGGATAA | TACCGCGCCA | CATAGCAGAA | CTTTAAAGT  | GCTCATCATT | GGAAACGTT  | CTTCGGGGCG | AAAATCTCA  |
| bla                    |            |             |            |            |            |            |            |            |            |            |
| 6301                   | AGGATCTTAC | CGCTGTTGAG  | ATCCAGTTCG | ATGTAACCCA | CTCGTGACCC | CAACTGATCT | TGAGCATCTT | TTACTTTTAC | CAGCGTTTCT | GGGTGAGCAA |
| bla                    |            |             |            |            |            |            |            |            |            |            |
| 6401                   | AAACAGGAG  | GCAAAATGCC  | GCAAAAAGG  | GAATAAGGCC | GACACGGAAA | TGTTGAATAC | TCATACTCTT | CTTTTTTCAA | TATTATTGAA | GCATTTATCA |
| bla                    |            |             |            |            |            |            |            |            |            |            |
| 6501                   | GGGTATTGT  | CTCATGAGCG  | GATACATATT | TGATGTATT  | TAGAAAATA  | AACAATAGG  | GGTTCGCGC  | ACATTTCCCC | GAAAAGTCCC | ACCTGACGTC |
| 6601                   | TAAGAACCA  | TTATTATCAT  | GACATTAAAC | TATAAAAATA | GCGGTATCAC | GAGGCCCTTT | CGTC       |            |            |            |

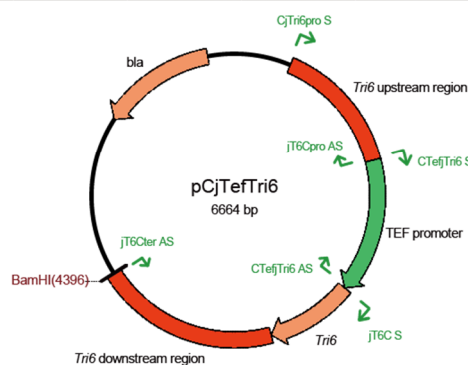

|             |            |            |            |            |            |             |             |            |            |            |
|-------------|------------|------------|------------|------------|------------|-------------|-------------|------------|------------|------------|
| 1           | GGGTAAAGCC | AGGGTTTTCC | CAGTCAGCAC | GTGTAAAGC  | GACGCGCAAT | GCCAAAGCTTG | CATGCGCTGCA | GGTCACTCT  | AGAGTTTGT  | CCAAGAGCGG |
| Upstream HR |            |            |            |            |            |             |             |            |            |            |
| 101         | GATGTTTTCT | GATATCTGTA | GCCTTGACGG | GAATGAGAGA | GCAGTCCAT  | ACGTCAAGGT  | CTCTCTTAC   | GACTGTCTGG | TTGGGGACGC | TATTCGCATT |
| Upstream HR |            |            |            |            |            |             |             |            |            |            |
| 201         | GACTTTGGAT | GACTCTTTAG | GCTTACCAAT | ACAATCTTGA | CTAACACTG  | CATACGGTTC  | AGATATTGG   | CCATCTAATG | ATATATAGTT | AATAGCAACA |
| Tri5        |            |            |            |            |            |             |             |            |            |            |
| 301         | GAACTTTGTA | ATTAGAGAT  | GACAAAGACT | TGACTTGTGA | ATTATTGAA  | TAACTGTAC   | CAGTACAAAC  | TTGCCATCAT | GGAAAATCTT | CCGACCGAGT |
| Tri5        |            |            |            |            |            |             |             |            |            |            |
| 401         | ATTTTCTCAA | CAGTAGCGTG | CGCTTCTCTG | AGTATATTGG | ATACCGAGAC | AGCAATTACA  | CCCGAGAGGA  | GCGCATCGAG | AATTTCAGCT | ATGCTTACAA |
| Upstream HR |            |            |            |            |            |             |             |            |            |            |

|      |            |             |            |
|------|------------|-------------|------------|
|      |            | Tri5        |            |
|      |            | Upstream HR |            |
| 501  | CAGGCTGCG  | CACCACTTGG  | CTCAGCCTCG |
|      |            | Tri5        |            |
|      |            | Upstream HR |            |
| 601  | GTATACAGCT | GGGCAAGGT   | GTCCAAGAG  |
|      |            | Tri5        |            |
|      |            | Upstream HR |            |
| 701  | CTGCCATGT  | GACTATTTT   | GAAGCCTTC  |
|      |            | Tri5        |            |
|      |            | Upstream HR |            |
| 801  | TTTTGGACT  | TTCTGCTCAT  | TGAACCTTAT |
|      |            | Tri5        |            |
|      |            | Upstream HR |            |
| 901  | CACACAGTTT | TGAGGATGT   | TGATTGAGC  |
|      |            | Tri5        |            |
|      |            | Upstream HR |            |
| 1001 | TCATTGTGT  | GGGCTCTCT   | TATGGCCAA  |
|      |            | Tri5        |            |
|      |            | Upstream HR |            |
| 1101 | GTTTGGTCA  | ATGATCTCAT  | GTACTTCTAC |
|      |            | Tri5        |            |
|      |            | Upstream HR |            |
| 1201 | TGATGAGAC  | TTTGGAGAG   | CTCACCAGG  |
|      |            | Tri5        |            |
|      |            | Upstream HR |            |
| 1301 | TGAGTTTTC  | ATGCATGGCT  | ACGTACGGTG |
|      |            | Tri5        |            |
|      |            | Upstream HR |            |
| 1401 | GCCAAGAGT  | CTGTCAAGTT  | CTTTGAGCAG |
|      |            | Tri5        |            |
|      |            | Upstream HR |            |
| 1501 | GGGCCAGGA  | CGATGTGAAG  | GAGGCTCAGA |
|      |            | Tri5        |            |
|      |            | Upstream HR |            |
| 1601 | ACGACAGCAG | AGAGAGGGG   | TGAGTAATAA |
|      |            | Tri5        |            |
|      |            | Upstream HR |            |
| 1701 | CCCTCGCCCC | CGAGGTGGA   | AGGCTGGTGT |
|      |            | Tri5        |            |
|      |            | Upstream HR |            |
| 1801 | CGAAGGAGAA | TGTGAAGCCA  | GGGTGTGATA |
|      |            | Tri5        |            |
|      |            | Upstream HR |            |
| 1901 | CACGAGATAG | TACCTTCTCC  | GAAGTAGSTA |
|      |            | Tri5        |            |
|      |            | Upstream HR |            |
| 2001 | CTCTCTGCT  | TTGCCCGTG   | TATGAAGCCG |
|      |            | Tri5        |            |
|      |            | Upstream HR |            |
| 2101 | TCGTCACTG  | ACCTGCTGAG  | GTCCCTCAGT |
|      |            | Tri5        |            |
|      |            | Upstream HR |            |
| 2201 | TCACACATT  | GTTCATAT    | TTTCTGCTC  |
|      |            | Tri5        |            |
|      |            | Upstream HR |            |
| 2301 | ACCTTTATTT | CCCTTAAGTA  | AGTACTTTGC |
|      |            | Tri5        |            |
|      |            | Upstream HR |            |
| 2401 | GCAGCTGAC  | TAAACCTAC   | CCCGCTTGA  |
|      |            | Tri5        |            |
|      |            | Upstream HR |            |
| 2501 | TCCTGAGCT  | GATGAGCTC   | TGCGAGGCG  |
|      |            | Tri5        |            |
|      |            | Upstream HR |            |
| 2601 | TGGTTCTAC  | AAAGATGTT   | ATGTTATCG  |
|      |            | Tri5        |            |
|      |            | Upstream HR |            |
| 2701 | TATTCATCT  | CCCGCGTGC   | ACAGGTGTC  |
|      |            | Tri5        |            |
|      |            | Upstream HR |            |
| 2801 | TCGCTCGGC  | CGATCTTAGC  | CAGACGAGCG |
|      |            | Tri5        |            |
|      |            | Upstream HR |            |
| 2901 | TGATCCCAT  | GTGTATCACT  | GGCAACTGT  |
|      |            | Tri5        |            |
|      |            | Upstream HR |            |
| 3001 | CCCGAGTCC  | GGCACCTCG   | GCATCGGAT  |
|      |            | Tri5        |            |
|      |            | Upstream HR |            |
| 3101 | TCGGGATTC  | CCAATACGAG  | GTCCGCAACA |
|      |            | Tri5        |            |
|      |            | Upstream HR |            |
| 3201 | GCTTGACGA  | TCGCCCGGCC  | TCCGGCGSTA |
|      |            | Tri5        |            |
|      |            | Upstream HR |            |
| 3301 | GGGACGGTC  | GATGCGAGC   | AATCGTCCA  |
|      |            | Tri5        |            |
|      |            | Upstream HR |            |
| 3401 | TAGAAGTACT | CGCCGATAGT  | GGAAACGAC  |
|      |            | Tri5        |            |
|      |            | Upstream HR |            |
| 3501 | CCAGGCTGCG | CGTTCTCGCG  | GCATAGCAA  |
|      |            | Tri5        |            |
|      |            | Upstream HR |            |
| 3601 | ACGCTACTGC | GGGTTTATAT  | AGACGGTCCC |
|      |            | Tri5        |            |
|      |            | Upstream HR |            |
| 3701 | TACCCGAGCC | GATGACTTAC  | TGGCGGTGTC |
|      |            | Tri5        |            |
|      |            | Upstream HR |            |
| 3801 | CGGGGACGCG | CGGTGTGTAA  | TGACAGAGCG |
|      |            | Tri5        |            |
|      |            | Upstream HR |            |



|               |             |            |            |            |            |            |            |            |            |             |
|---------------|-------------|------------|------------|------------|------------|------------|------------|------------|------------|-------------|
| 3901          | GGAGCTCAGC  | ATGCCCCGCG | CCCGGCCCTC | ACCTCTGATC | TGGACCGCCA | TCCGATCGCC | GCCTCTCTGT | GCTACCCGGC | CGCGCGATAC | CTTATGGSCA  |
| HSVtk         |             |            |            |            |            |            |            |            |            |             |
| 4001          | GCATGACCCC  | CGAGGCCGTG | CTGGCGTTCG | TGGCCCTCAT | CCCCGCCGAC | TTGCCCGSCA | CCAAATCGTG | GCTTGGGGCC | CTTCCGGAGG | ACAGACACAT  |
| HSVtk         |             |            |            |            |            |            |            |            |            |             |
| 4101          | CGACCCCTGG  | GCCAAACGCC | AGCGCCCGGG | CGAGCGGCTG | GACCTGGCTA | TGCTGGCTGC | GATTGCCCCG | GTTTACGGGC | TACTTGCCAA | TACGGTGGGG  |
| HSVtk         |             |            |            |            |            |            |            |            |            |             |
| 4201          | TATCTGACGT  | CGCGCGGGTC | GTGGCGGGAG | GACTGGGGAC | AGCTTTCCGG | GACGGCCGTG | CCGCCCCAGG | GTGCCGAGCC | CCAGAGCAAC | GCGGGCCAC   |
| HSVtk         |             |            |            |            |            |            |            |            |            |             |
| 4301          | GACCCCATAT  | CGGGACACGG | TTATTACACC | TGTTTCGGGC | CCCCGAGTTG | CTGGCCCCCA | ACGGCGACCT | GTATTACGGT | TTTGCCTGGG | CCTTGGACGT  |
| HSVtk         |             |            |            |            |            |            |            |            |            |             |
| 4401          | CTTGGCCAAA  | CGCTCCGTTT | CCATGACAGT | CTTTATCTCG | GATTACGACC | AATCGCCCGC | CGGCTGCCGG | GACGCCCTGC | TGCAACTTAC | CTCCGGGATG  |
| dTri10P-D_5   |             |            |            |            |            |            |            |            |            |             |
| Downstream HR |             |            |            |            |            |            |            |            |            |             |
| 4501          | GTCCAGACCC  | AGGTACCCAC | CCCCGCCCTC | ATACCGACGA | TATCGGACCT | GGCGCGACGG | TTTGGCCGGG | AGATGGGGGA | GGCTAACTGA | CATGGATTTC  |
| hphtkC2_AS    |             |            |            |            |            |            |            |            |            |             |
| Downstream HR |             |            |            |            |            |            |            |            |            |             |
| Tri10         |             |            |            |            |            |            |            |            |            |             |
| 4601          | dTri10P-D_5 | CCAAAGCCTA | GACAAGTCCG | AGAGACGAGC | CTGTTGATGT | ACTACTAGAA | CGTCGTGTTT | CTCTGCAAT  | GCATCAACCC | AAACAACAAT  |
| Tri10         |             |            |            |            |            |            |            |            |            |             |
| Downstream HR |             |            |            |            |            |            |            |            |            |             |
| 4701          | AGAGGAGATG  | CGTGTGACT  | ATACTGACCT | CTGGCGGCC  | TACGTACTAT | GCACATTGT  | GCATGTGCT  | CCTCTATAAA | GAATCGCTTT | CAAGCCCTTG  |
| Tri10         |             |            |            |            |            |            |            |            |            |             |
| Downstream HR |             |            |            |            |            |            |            |            |            |             |
| 4801          | CAGATCTGAA  | CAGGCGATGG | TATGGAGAGG | AGAGAGAGCA | TACTACTACA | TTCTTCACT  | CCAGGAGTCT | CAGAGCTGC  | TGGTGGGCT  | CGACAGACAA  |
| Tri10         |             |            |            |            |            |            |            |            |            |             |
| Downstream HR |             |            |            |            |            |            |            |            |            |             |
| 4901          | TTTGGCATCA  | CAAGGCTGAA | AGGTACGCTC | GTGGCCCTTG | CTTGATGCT  | ACAGCTTATC | AGTTTTGGGG | TAGAGCGAAT | CCACCATTTG | TTGGATGCTC  |
| Tri10         |             |            |            |            |            |            |            |            |            |             |
| Downstream HR |             |            |            |            |            |            |            |            |            |             |
| 5001          | GATGTGATG   | CTCGATATCC | GATCTACGAT | TATCGTTGGT | CACTAACAAA | TTAAATAGT  | CTTGGACCTT | AAGCAGGGGA | GATTGGCGGG | TTCACTTCCA  |
| Tri10         |             |            |            |            |            |            |            |            |            |             |
| Downstream HR |             |            |            |            |            |            |            |            |            |             |
| 5101          | TGCGGCCAAC  | ATACTCATTC | CTGTCTTGST | TGAGGGATGG | TCCACAGCTT | TGCAATCAGG | CCCCCGAGCC | ACCTCATAT  | GGTGGAGACT | GGATGATCA   |
| Tri10         |             |            |            |            |            |            |            |            |            |             |
| Downstream HR |             |            |            |            |            |            |            |            |            |             |
| 5201          | CACCTCGSCT  | CGACTGAAGA | TCAAACCTCT | TTGAGCTTCG | AATAGCTGGG | AGCTTTGAGA | TTCTGTCAA  | ACTCACTGCG | CGAGTGGGCG | ATCCTGTCTT  |
| Tri10         |             |            |            |            |            |            |            |            |            |             |
| Downstream HR |             |            |            |            |            |            |            |            |            |             |
| 5301          | GCATATCTAT  | TGGCCCATCA | GCACCATTTG | AAGATTACGG | CCATCTCTCG | GACCAAGCAG | GCCTTATACA | GCTGGACGAG | GTGCTGGGCT | GCAGGAAATTG |
| Tri10         |             |            |            |            |            |            |            |            |            |             |
| Downstream HR |             |            |            |            |            |            |            |            |            |             |
| 5401          | GACCATTTTG  | ACTATTCTCG | AGTGGGGTAA | GCTGGATCGT | TGGAGGGGAC | AGGAGCAAGA | ACATAATCGC | TTGAGCCTAA | AGAGCGCTCG | TAGGGCGGCG  |
| Tri10         |             |            |            |            |            |            |            |            |            |             |
| Downstream HR |             |            |            |            |            |            |            |            |            |             |
| 5501          | ATGATGATTT  | AGGATATGTT | GTACAGCGAG | CTACAAAGGC | TACCGACAGA | CGAGACGCTT | CCAGACCTCA | TCACTCAGAT | TTACGCGGCC | TCTATCATGA  |
| Tri10         |             |            |            |            |            |            |            |            |            |             |
| Downstream HR |             |            |            |            |            |            |            |            |            |             |
| 5601          | CGTATCTGCA  | TACAGTAGTT | TCCGAGCTCA | ATCCCAACCT | TTCAAGAGTT | CAGGATAGTG | TGGCCGGGAC | GCTTCAATTG | TTGGAGAGGC | TCCCAAACTC  |
| Tri10         |             |            |            |            |            |            |            |            |            |             |
| Downstream HR |             |            |            |            |            |            |            |            |            |             |
| 5701          | TGAAGCTGTC  | ACGAGCGTTA | CTTGGCTCT  | AGCTGTCACA | GGATGATGGG | CCTCAGAAG  | TCATAAGGAC | TTTTTCAGAA | ATACTCTGAG | GTGCTATGAG  |
| Tri10         |             |            |            |            |            |            |            |            |            |             |
| Downstream HR |             |            |            |            |            |            |            |            |            |             |
| 5801          | GGCAGCTTCA  | GCCTCTTAAA | AAAGATGAGC | GGACCTCTTC | AGGCTCTGGA | AGAGCGTTGG | AAGAGAGAGG | AGATAGATAC | AGAGTCTCCA | ATGAGATGGG  |
| Tri10         |             |            |            |            |            |            |            |            |            |             |
| Downstream HR |             |            |            |            |            |            |            |            |            |             |
| 5901          | AGAGCTTGAC  | GGATCACCAT | GGGCTTCCAG | TGCTACTTTG | GTAGGGATGG | TATCGGCGCA | GGAGCTACGG | ATACCGATAC | CCGAAGTCTT | TCTTCTGCA   |
| Tri10         |             |            |            |            |            |            |            |            |            |             |
| Downstream HR |             |            |            |            |            |            |            |            |            |             |
| 6001          | CAGCTACCGG  | ATACATGTAA | GTTGATGCT  | CACCTACAGA | TGATGACTGC | AGGAGGTTT  | TATTAGATGT | TATGGSTTCG | ACTCATTTTG | GCSTTTAAAC  |
| Tri10         |             |            |            |            |            |            |            |            |            |             |
| Downstream HR |             |            |            |            |            |            |            |            |            |             |
| 6101          | AGGAGTTGGC  | ATGATGCATG | ATTTAATATG | AATGAGAGGG | CGGAAACGTT | TTCCCATGTA | ACTTGATGTA | TGGACCTTCA | ATATATATTT | CTAGTATACT  |
| Tri10         |             |            |            |            |            |            |            |            |            |             |
| Downstream HR |             |            |            |            |            |            |            |            |            |             |
| 6201          | TTTTTAACGG  | TGAGCCGAT  | CTTCTCCATC | TATCCAAACA | ATCGTGTGTA | AAGCAGTCTG | GAACCATGGT | GGGCGAATCA | GTGCTGTGTC | CCTTGATTGT  |
| Vb_5          |             |            |            |            |            |            |            |            |            |             |
| Downstream HR |             |            |            |            |            |            |            |            |            |             |
| 6301          | CTCGACATGG  | CTTGACATTG | TTTAGCCCGT | ACGCAAAAGC | ATATTGATCA | TAGTGAAAGG | GTGTTGATTT | CAAGCGAGGG | GATTTGTGGA | AGTTCCGGGGT |
| dTri10P-D_AS  |             |            |            |            |            |            |            |            |            |             |
| Vb_5          |             |            |            |            |            |            |            |            |            |             |
| 6401          | ACCGAGCTCG  | AATTGCTAAT | CATGGTCATA | CGTGTTCCT  | GTGTGAAATT | GTATCCGCT  | CACAATTCCA | CACAACATAC | GAGCCGGAGG | CATAAAGTGT  |
| dTri10P-D_AS  |             |            |            |            |            |            |            |            |            |             |
| 6501          | AAAGCTCGGG  | GTGCTTAATG | AGTGAGCTAA | CTCAATAA   | TTGGGTTGGG | CTCACTGCCC | GCCTTCCAGT | CGGGAAACCT | GTGCTGCCAG | CTGCATTAA   |
| 6601          | GAATCGGCCA  | ACGGCGGGGG | AGAGGCGGTT | TGGCTATTGG | CGCGCTCTCC | GCCTCTCGCG | TCACTGACTC | GCCTGCCGTC | GTGCTTCGGG | TGCGGCGAGC  |
| 6701          | GGTATCAGCT  | CACCTAAAGG | CGGTAATACG | GTATCCACAA | GAATCAGGGG | ATAACGACAG | AAAGAACATG | TGAGCAAAAG | GCCAGCAAAA | GGCCAGGAAC  |
| 6801          | CGTAAAGAGG  | CGCGGTTGCT | GGCGTTTTTC | CATAGGCTCC | GGCCCCCTGA | CGAGCATCAC | AAAAATCGAC | GCCTAAGTCA | GAGGTGGGGA | AAACCGACAG  |
| 6901          | GACTATAAG   | ATACAGGGCG | TTTCCCGCTG | GAGGCTCCCT | CGTGGGCTCT | CTGTTCGCGA | CCCTGGCGCT | TACCGGATAC | CTGCTCGGCT | TTCTCCCTTC  |
| 7001          | GGGAGGCGTG  | GGCGTTCTCT | ATAGCTCAGG | CTGTAGGAT  | CTCAGTTGCG | TGTAGGCTGT | TGCGTCCAGG | CTGGGCTGTG | TGCACGAACC | CCCCGTTGAG  |
| 7101          | CCGACCGCGT  | GGCGCTTTAT | CGGTAACTAT | CGTCTTGAGT | CCAAACCCGG | AAGACAGGAC | TTATCGCCAC | TGGCAGCAGC | CACCTGGTAA | AGGATTAAGA  |
| 7201          | GAGCGAGGTA  | TGTAGGCGGT | GCTACAGAGT | TCTTGAAGTG | GTGGGCTAAC | TACGGCTACA | CTAGAGGAGC | AGTATTGGT  | ATCTGCGCTC | TGCTGAAGCC  |
| 7301          | AGTTACTCTC  | GGAAAAAGAG | TTGGTAGCTC | TTGATCCGGC | AAACAACCA  | CCGCTGGTAG | CGGTGGTTTT | TTTGTTTGCA | AGCAGAGAT  | TACGCCGAGA  |

|      |            |            |            |             |            |            |            |            |            |            |
|------|------------|------------|------------|-------------|------------|------------|------------|------------|------------|------------|
| 7401 | AAAAAGAT   | CTCAAGAAGA | TCCTTTGATC | TTTCTACGG   | GGTCTGACGC | TCAGTGGAAC | GAAACTCAC  | GTAAAGGAT  | TTTGTCTATG | AGATTATCAA |
| 7501 | AAAGGATCTT | CACCTAGATC | CTTTTAATT  | AAAAATGAG   | TTTTAATCA  | ATCTAAGATA | TATATGAGTA | AACTTGGTCT | GACAGTTACC | AATGCTTAAT |
|      |            |            |            |             |            | AhdI       |            |            |            | bla        |
| 7601 | CAGTGAAGCA | CCTATCTCAG | CGATCTGTCT | ATTTCGTTC   | TCCATAGTTG | CCTGACTCCC | CGTGTGTAG  | ATAACTACGA | TACGGGAGGG | CTTACCATCT |
|      |            |            |            |             |            | bla        |            |            |            |            |
| 7701 | GGCCCCAGTG | CTGCAATGAT | ACCGCGAGAC | CCACGCTCAC  | CGGCTCCAGA | TTTATCAGCA | ATAAACACGC | CAGCCGGAAG | GGCCGAGCGC | AGAAGTGTCT |
|      |            |            |            |             |            | bla        |            |            |            |            |
| 7801 | CTGCACTTTT | ATCCGCTCTC | ATCCAGTCTA | TTAATTGTTG  | CCGGGAAGCT | AGAGTAAGTA | GTTCGCGAGT | TAATAGTTTG | CGCAACGTTG | TTCGCAATTG |
|      |            |            |            |             |            | bla        |            |            |            |            |
| 7901 | TACAGGCATC | GTGGTGTAC  | GCTCGTCTT  | TGGTATGGCT  | TCATTCACT  | CCGGTTCCCA | ACGATCAAGG | CGAGTTACAT | GATCCCCCAT | GTGTGTCAAA |
|      |            |            |            |             |            | bla        |            |            |            |            |
| 8001 | AAAGCGTTA  | GCTCCTTCGG | TCCTCCGATC | GTGTGCAGAA  | GTAAATTGGC | CGCAGTGTTA | TCATCATGG  | TTATGGCAGC | ACTGCATAAT | TCTCTTACTG |
|      |            |            |            |             |            | bla        |            |            |            |            |
| 8101 | TCATGCCATC | CGTAAGATGC | TTTTCTGTGA | CTGGTGAAGTA | CTCAACCAAG | TCATTCTGAG | AATAGTGTAT | GGGGGACCG  | AGTTGCTCTT | GGCCGGGCTC |
|      |            |            |            |             |            | bla        |            |            |            |            |
| 8201 | AATACGGGAT | AATACCGCG  | CACATAGCAG | AACTTTAAAA  | GTCTCATCA  | TTGGAAGACG | TTCTTGGGG  | CGAAACTCT  | CAAGGATCTT | ACCGCTGTTG |
|      |            |            |            |             |            | bla        |            |            |            |            |
| 8301 | AGATCCAGTT | CGATGTAACC | CACCTGTGCA | CCCACTGAT   | CTTCAGCATC | TTTACTTTT  | ACCAGGTTT  | CTGGGTGAGC | AAAAACAGGA | AGGCAAAATG |
|      |            |            |            |             |            | bla        |            |            |            |            |
| 8401 | CCGCAAAAA  | GGGAATAAGG | CGGACACGGA | AATGTTGAAT  | ACTCATACTC | TTCTTTTTC  | AATATTATTG | AAGCATTAT  | CAGGGTTATT | GTCTCATGAG |
|      |            |            |            |             |            | bla        |            |            |            |            |
| 8501 | CGGATACATA | TTTGAATGTA | TTTAGAAAA  | TAAACMAATA  | GGGGTCCGC  | GCACATTCC  | CCGAAAGTG  | CCACTGACG  | TCTAAGAAAC | CATTATTATC |
| 8601 | ATGACATTAA | CTATAAAAA  | TAGGCTGATC | ACGAGGCCCT  | TTGCTCTCG  | GGTTTCGGT  | GATGACGGTG | AAACCTCTG  | ACACATGACG | CTCCCGGAGA |
| 8701 | CGGTCACAGC | TTGTCTGTAA | CGCGATGCCG | GGAGCAGACA  | AGCCCGTCAG | GGCGGCTCAG | CGGGTGTTCG | CGGGTGTTCG | GGCTGGCTTA | ACTATGCGGC |
| 8801 | ATCAGACGAG | ATTGTAAGTA | GAGTGCACCA | TATGCGGTGT  | GAAATACCGC | ACAGATGCGT | AAGGAGAAAA | TACCGCATCA | GGCGCCATTC | GCCATTCAGG |
| 8901 | CTCGCAACT  | GTGGGAGG   | GCATCGGTG  | CGGCTCTT    | CGCTATTACG | CCAGCTGGCG | AAAGGGGAT  | GTGCTGCAAG | GCATTAAAT  | T          |

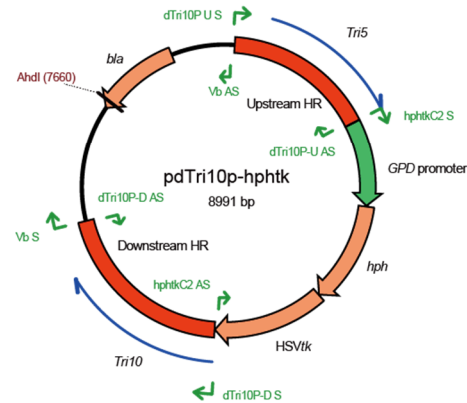

|      |            |            |            |            |            |                  |            |            |            |            |
|------|------------|------------|------------|------------|------------|------------------|------------|------------|------------|------------|
| 1    | GGGTAGGCC  | AGGGTTTTCC | CAGTACGAC  | GTGTAAAC   | GACGGCCAGT | GCACAGCTTG       | CATGCTGCA  | GGTCACTCT  | AGAGCAGTAC | AACCTTGGAG |
|      |            |            |            |            |            | SwTri10P-U.S     |            |            |            |            |
|      |            |            |            |            |            | Vb_AS            |            |            |            |            |
|      |            |            |            |            |            | Tri5 partial CDS |            |            |            |            |
|      |            |            |            |            |            | Upstream HR      |            |            |            |            |
| 101  | GATTCACAG  | ATCTGATGAC | TACCTCAAT  | TCCTTCGTG  | TATGATGAT  | TTGGGTCTT        | GTGTTGGGG  | TTCTCTATG  | CCCAAGGACC | TGTTTGATGA |
|      |            |            |            |            |            | Upstream HR      |            |            |            |            |
| 201  | GGCGAGCAT  | TTCTTGAAA  | TCACGTGAC  | CGTTGCTCAG | ATGAGAACT  | GGATGTTTG        | GGTCAATGAT | CTCATGTCAT | TCTACAGGA  | ATTGAGCAT  |
|      |            |            |            |            |            | Upstream HR      |            |            |            |            |
| 301  | GAGCGTACC  | AATCAGTCT  | GGTCAAGAC  | TTTGTCACT  | GCCATGAGAT | CACCTGGAT        | GAGCTTTGG  | AGAGGCTGAC | CCAGGAAACC | CTACACTGCT |
|      |            |            |            |            |            | Upstream HR      |            |            |            |            |
| 401  | CTAAGCAGAT | GGTTGCTGTC | TTCTCGACA  | AGGACCTCTA | GGTGTGAGC  | ACGATTGAT        | GTTCATGCA  | TGGCTAGCTC | ACGTGGCACT | TGTGGGAGCG |
|      |            |            |            |            |            | Upstream HR      |            |            |            |            |
| 501  | TCGATACCG  | CTCCATGAGA | TTTATGAAA  | GGTCAAGGAT | CAGGATACAG | AGGACGCCAA       | GAAGTTCTGC | AACTTCTTTG | AGCAGCGCGC | CAATGTCGGC |
|      |            |            |            |            |            | Upstream HR      |            |            |            |            |
| 601  | GCCCTTGAC  | CCTCGGAGTG | GGCTTATCCA | CAAGTTGAC  | AACTGGCAAA | CGTTCCGGCC       | AAGGAGCATG | TGAAGGAGCG | TCAGAGGCC  | ATCTAAAGT  |
|      |            |            |            |            |            | Tri10 promoter   |            |            |            |            |
|      |            |            |            |            |            | Upstream HR      |            |            |            |            |
|      |            |            |            |            |            | Tri5 partial CDS |            |            |            |            |
| 701  | CAATTGACCT | AGTGGATAA  | CCGAGGCGA  | GTTTGGAGT  | ATGTTTGGG  | GGTACGGATA       | CTGCTTTGGA | GAATGTTGCT | CTGTTAAT   | GATTACAAAT |
|      |            |            |            |            |            | Tri10 promoter   |            |            |            |            |
| 801  | AGTTCGGTG  | TGTTTGTGA  | GAATGACAG  | TTGAGCAAG  | ATAATTACTT | CGGATAGGC        | AGTTGAAGCT | GAATGCTCTG | ACGTAACTGT | AGCCTGTAA  |
|      |            |            |            |            |            | Tri10 promoter   |            |            |            |            |
| 901  | CATTTCACG  | TTGAGTGCAG | GCCTTTGGCT | AACCAAGTCT | GTACACCGCT | GGTGGGACCA       | GGGCTACCCC | CAACCTGCA  | ACTGATCTG  | CAGCTGACG  |
|      |            |            |            |            |            | Tri10 promoter   |            |            |            |            |
| 1001 | TGGCAGAGTG | GTAGACTGGC | GCTACGAAT  | GTAGTGGAT  | GGCGGAATCT | TGTATCCGCT       | CGGAGTTTGG | AGGGAGCTGG | CACATTCTCT | AGACCCGCGA |
|      |            |            |            |            |            | Tri10 promoter   |            |            |            |            |
| 1101 | ATTGATCTTC | AAAGCGCTTG | CGTTTGTGTC | AGATCAGTGA | CCATACCTT  | GCTTTTGGC        | ACCACCCAAA | CGTCCACTGA | ACGAGGCGTA | CAGAAACAC  |

|      |                                                                                                              |
|------|--------------------------------------------------------------------------------------------------------------|
| 1201 | ACAGATAGG GTTTGATGCC TGCTTGAGCA CTATGAGGGA CACGACACT CTGTAAACT CTATCCTTGC ATTATATTGT AACATCGTTT AACTTCTCCA   |
|      | Tri10 promoter<br>gpd10P_S<br>GPD promoter                                                                   |
| 1301 | CGCCCATCC TTCCCGTCTT TCCCCCACT TCAATTGTAT GCCAACCAAC AATCATCAA TTATCATTAT TATTGTGTT AGTCATCCCG GTGACTCTTT    |
|      | Tri10 promoter<br>JTri10P_AS<br>GPD promoter                                                                 |
| 1401 | CTGGCATGCG GAGAGACGGA CGAGACGAGA GAGAAGGGCT GAGTAATAAG CGCCACTGCG CCAGACAGCT CTGGCGGCTC TGAGGTGAG TGAGTGATTA |
| 1501 | TTAATCCGGG ACCCGCCGCC CCTCCGCCCC GAAGTGGAAA GGTGTGTGTG CCCTCGTTTG ACCAAGATC TATTGCATCA TCGGAGATA TGGAGCTTCA  |
| 1601 | TGGAATCACC GGCATTAAGC GAGGAGAAAT GTGAAGCGAG GGTGTATAG CCCTCGGCGA AATAGCATGC CATTACCTA GGTACAGAG TCCAATTGCT   |
| 1701 | TCGATCTGG TAAAGATTCC ACAGATAGT ACCTTCTCCG AAGTAGTAG AGCAGATACC CGGCGGTAA GCTCCTAAT TGGCCATCC GGCATCTGTA      |
| 1801 | GGCGSTCAA ATATCGTGCC TCTCTGCTT TGCCCGGTGT ATGAACCGG AAGGCCGCT CAGGAGCTGG CCAGCGGCG AGACCGGAA CACAAGCTGG      |
| 1901 | CAGTCAGCCC ATCCGGTGCT CTGCATCGA CCTCTGAGC TCCCTGAGTC CCGTAGGAG AGCTTTGCCC GGTCTGCGC CCCGTTGTGT CGGCGGGTT     |
| 2001 | GACAAGTGG TTGGCTAGT CCAACATTG TTGCATATT TTCTGCTCT CCCACAGC TGCTCTTTTC TTTTCTCTT CTTTCCCAT CTTAGATATA         |
| 2101 | TTATCTTCC CATCCAGAA CTTTATTTC CCCTAAGTAA GTACTTGTCT ACATCCATAC TGCATCCTTC CCATCCCTTA TTCTTTGAA CTTTCAGT      |
|      | GPD promoter<br>Downstream HR<br>Tri10<br>JTri10P_S<br>gpd10P_AS                                             |
| 2201 | CGAGCTTCC CACTTCATG CAGCTTGACT AACAGTACC CCGCTTGAGA TGATTTCCT AAGCGTAGA CAGTCCGAG AGACGAGCCT GTTGATGTAC      |
| 2301 | TACTTAGAG TCGTGTTCCT TCTGATGTC ATCAACCAA ACAACAATTG TCTGGGAAG AGAGAGTGG TGTGTACTAT ACTGACTCT GCGCGGCTTA      |
| 2401 | CGTACTATGC CACATTGTGC ATGTGCGTCC TCTATAAGA ATGCTTTTCA AGCCCTTGCA GATCTGAGA GCGATGGTA TGGAGAGAG AGAAGACATA    |
| 2501 | CTACTACAT CTTGCACTCC AGAGTCTCA GAAGCTGCTG GGTGGGCTG ACAAGACATT TGGATCACA AGGCTGAAG GTACCGTGT TGGCTTGTCT      |
| 2601 | TGACTGTAC AGCTTATCAG TTTTGAGTA AGACGAATCC ACCATTGTT CGATGCTGGA TGTGATGCT CGATATCCGA TCTAGATTA TCGTTGTCA      |
| 2701 | CTAACAAAT AAAATAGTCT TCGACCTAA GCGAGGAGGA TTGGCGCGTT CACCTCCATG CGGCCAAT ACTCATTCT GTCTTGGTTG AGGATGGTC      |
| 2801 | CGAGCTTTG GATCAGGCC CCCAGCCAC CTCATATGG TCGAGCTGG ATGAATACA CTTCGGCTG ACTGAATC AACTCTCTT GAGCTTCGA           |
| 2901 | TAGCTCGAG CTTTGAGATT CCTGTCAAC TCACTCGCG CAGTCGGCAT CCGTCTTGC ATATCTATTG GCCCATCAG ACCATTGAA GATTACGGC       |
| 3001 | ATCTCTCGA CCAGCCAGGC CTTATACAG TGGACGAGT GCTGGGGTG AGGAATTGA CCATGTTGAC TATTCTGAA GTGGTAAGC TGGATCGTTG       |
| 3101 | GAGCGACAG GAGCAAGAAC ATATCGCTT GAGCTAAG ACCTCTGCTA GCGCGCCAT GATGATTGAG GATATGTTG CAGAGAGCT ACAAGGCTA        |
| 3201 | CCGACAGAG AGAGCTTCC AGACTCATC ACTCAGATT ACGCCGCTC TATCATGAG TATCTGCATA CAGTAGTTC CGGACTCAI CCCAACCCTT        |
| 3301 | CAGAGTTCA GATAGTGTG GCGGAGGCG TTCAATTGTT GAGAGGCTC CCAATCTTG AAGCTGTAC GAGCGTACT TGGCTCTAG CTGTACAGG         |
| 3401 | ATGATGACC TCAGAAAGTC ATAAGGACTT TTTCAGAAAT ACTCTGAGT CGTATGAGGC GACATTGAG TCCTTAAAA AGTATGAGCG AACTCTTCA     |
| 3501 | GTCTTGGAG ACCTCTGGAA GAGAGAGAG ATAGATACAG AGTCTCCAAT GAGATGGAA GACTTGAGCG ATACCATGG GCTTCCAGT CTACTTGTG      |
| 3601 | AGGATGGTA TCGGCGCAGA GACTACGAT ACCGATACC GAAGTCTTC TTCTGCATCA GCTACCGAT ACATGTAAG TTGATGCTA CTTAGAGATG       |
| 3701 | ATGATGAGC GGAAGTTTTA TTAGATGTA TGGGTTGAG TCATTTTGGC GTTTAAACAG GATTTGGCAT GATGATGAT TTAATGGAA TAGAAGAGCG     |
| 3801 | GAAAAGTTT CCATGTATC TTGATGATG GACTTCAAT ATATATTCT AGTATACTTT TTTAAGCGTG AACCGATCT TCTCATCTA TCCAACCAAT       |
| 3901 | CGTCTGAAA GCACTCTGA ACCATGTTGG GCGAATCAGT GCTGTGTCCC TTGATGTCT CGACATGGCT TGACATTGT TABCCGCTAC GACAACGAT     |
| 4001 | ATTGATACA GTGAAGAGT GTTGATTCA AGCGAGGGA TTTGTGAG TTCCGGGTAC CGAGCTCGAA TTGTAATCA TGGTCATAG TGTTCCTGT         |
|      | Downstream HR<br>Vb_S<br>dTri10P-D_AS                                                                        |

|      |            |            |            |            |            |            |            |            |            |             |
|------|------------|------------|------------|------------|------------|------------|------------|------------|------------|-------------|
| 4101 | GTGAATTGT  | TATCGCTCA  | CAATCCACA  | CAACATACGA | GCCGGANGCA | TAAAGTGTA  | AGCTGGGGT  | GCTTAATGAG | TGAGCTAACT | CACATTAACT  |
| 4201 | GGTTTGGCT  | CACCTGCCG  | TTTCCAGTCG | GAAACCTGT  | CTGTCAGCT  | GCAATTAATG | ATCGGCCAAC | GCGCGGGGAG | AGCGGGTTTG | CGTATTGGCC  |
| 4301 | GCCTTCCGC  | TTCTCGCTC  | ACTGACTCG  | TGCGCTCGGT | CGTTCGCGTG | CGCGAGCGG  | TATCAGCTCA | CTCAAGGCG  | GTAATACGCT | TATCCACAGA  |
| 4401 | ATCAGGGGAT | AACGACGAA  | AGAATCTGTG | AGCAAAAGGC | CAGCAAAAGG | CCAGGAACCG | TAAAAAGGCC | GCCTTCTGCG | CGTTTTTCCA | TAGGCTCCGC  |
| 4501 | CCCCCTGACG | AGCATCACAA | AAATCGACGC | TCAAGTCAGA | GGTGGCGAAA | CCGACAGAGA | CTATAAGAT  | ACCAAGCGTT | TCCCCCTGGA | AGCTCCCTCG  |
| 4601 | TGCGCTCTCC | TGTTCCGACC | CTGCGCTTAA | CCGATACCTT | GTCCGCTCTT | CTCCCTTCGG | GAAGCGTGGC | GCCTTCTCAT | AGCTACGCT  | GTAAGTATCT  |
| 4701 | CAGTTCGGTG | TAGGTCGTTT | GTCTCAAGCT | GCGCTGTGTG | CAGCAACCCC | CGTTCAGCC  | CGACGCTGCG | GCCTTATCCG | GTAAGTATCG | TCTTGAGTCC  |
| 4801 | AACCGGTAA  | GACACGACTT | ATCGCACTG  | GCAGCAGCCA | CTGGTAAACG | GATTACAGA  | GCAGGATATG | TAGGCGGTGC | TACAGAGTTC | TTGAAGTGGT  |
| 4901 | GGCTAACTA  | CGGCTACACT | AGAAGACAG  | TATTTGGTAT | CTGCGCTCTG | CTGAAGCAG  | TTACCTTCGG | AAAAAGATT  | GSTAGCTCTT | GATCCGCGAA  |
| 5001 | ACAAACACC  | GCTGTGAGCG | GTGTTTTTTT | TGTTTGCAG  | CAGCAGATTA | CGCGCAGAAA | AAAGGATCT  | CAGAAGATC  | CTTTGATCTT | TTCTACGGGG  |
| 5101 | TCTGACGCTC | AGTGGAAACG | AAACTCACGT | TAAAGGATT  | TGGTCATGAG | ATTATCAAAA | AGGATCTTCA | CCTAGATCCT | TTTAAATTA  | AAATGAAGTT  |
| 5201 | TTAATCAAT  | CTAAGTATA  | TATGAGTAAA | CTTGGTCTGA | CAGTTACCAA | TGCTTAATCA | GTGAGGCACC | TATCTCAGCG | ATCTGTCTAT | TTGTTTATC   |
| b1a  |            |            |            |            |            |            |            |            |            |             |
| 5301 | CATAGTTGCC | TGACTCCCCG | TCGTGTAGAT | AACTACGATA | CGGGAGGGCT | TACCACTGG  | CCCCAGTCT  | GCAATGATAC | CGCGAGACCC | ACGCTCACCG  |
| b1a  |            |            |            |            |            |            |            |            |            |             |
| 5401 | GCCTCAGATT | TATCAGCAAT | AAACAGCCA  | GCCGGAAGGG | CCGAGCGCAG | AAGTGGTCT  | GCAACTTTAT | CCGCTCCAT  | CCAGTCTATT | AATTGTTGCC  |
| b1a  |            |            |            |            |            |            |            |            |            |             |
| 5501 | GGGAGCTAG  | AGTAAGTAGT | TCGCCAGTTA | ATAGTTTGGC | CAACGTTGTT | GCCATTGCTA | CAGGATCGT  | GGTGTACGC  | TCGCTGTTTG | GTATGGCTTC  |
| b1a  |            |            |            |            |            |            |            |            |            |             |
| 5601 | ATTACGCTCC | GGTTCCTAAC | GATCAAGGCG | AGTTACATGA | TCCCCCATGT | TGTGCAAAA  | AGCGGTTAGC | TCCTCGGTC  | CTCCGATCGT | TGTGAGAGT   |
| b1a  |            |            |            |            |            |            |            |            |            |             |
| 5701 | AAGTTGGCCG | CAGTGTATC  | ACTCATGTT  | ATGGCAGCAC | TGCATAATTC | TCTTACTGTC | ATGCCATCCG | TAGATGCTT  | TTCGTGACT  | GGTGAAGTACT |
| b1a  |            |            |            |            |            |            |            |            |            |             |
| 5801 | CAACGAGTC  | ATTCTGAGAA | TAGTGTATGC | GGGACCGAG  | TTGCTCTTGC | CGGCGTCAA  | TACGGGATA  | TACCGGCCA  | CATAGCAGAA | CTTTAAAGT   |
| b1a  |            |            |            |            |            |            |            |            |            |             |
| 5901 | GCATCATTT  | GGAAACGTT  | CTTCGGGGCG | AAACTCTCA  | AGGATCTTAC | CGCTGTTGAG | ATCCAGTTCG | ATGTAACCCA | CTCGTGCACC | CAACTGATCT  |
| b1a  |            |            |            |            |            |            |            |            |            |             |
| 6001 | TCAGCATCTT | TTACTTTTAC | CAGCGTTTCT | GGGTGAGCAA | AAACAGGAAG | GCAAAATGCC | GCAAAAAGG  | GAATAAGGC  | GACACGAGAA | TGTTGAATAC  |
| b1a  |            |            |            |            |            |            |            |            |            |             |
| 6101 | TCATCATCTT | CTTTTTTCAA | TATTATTGAA | GCATTATCA  | GGGTATTGTT | TCATGAGCG  | GATACATATT | TGAATGTATT | TAGAAAAATA | AACAATAGG   |
| b1a  |            |            |            |            |            |            |            |            |            |             |
| 6201 | GGTTCGCGC  | ACATTTCCCG | GAAAGTGCC  | ACCTGAGCTC | TAAGAAACCA | TTATTATCAT | GACATTAAAC | TATAAAATA  | GGCGTATCAC | GAGGCCCTTT  |
| 6301 | CGTCTCGCG  | GTTCGGTGA  | TGACGCTGAA | AACCTCTGAC | ACATGACGCT | CCCCGAGACG | GTCACAGCTT | GTCTGTAGC  | GGATGCCGGG | AGCAGACAG   |
| 6401 | CCCGTCAGGG | CGGTCAGCG  | GGTGTGGCG  | GGTGTGGGG  | CTGGCTTAAC | TATCGGCAT  | CAGACAGAT  | TGTACTGAGA | GTGACCATTA | TGCGGTGTGA  |
| 6501 | AATACGCGAC | AGATCGGTAA | GGAGAAATA  | CCGATCAGG  | GCGCATTCGC | CATTACGGCT | GCACAACGT  | TGGGAAGGCG | GATCGGTGCG | GGCCTCTCTG  |
| 6601 | CTATTACGCC | AGCTGGCGAA | AGGGGAGTGT | GCTGCAAGGC | GATTAAAGT  |            |            |            |            |             |

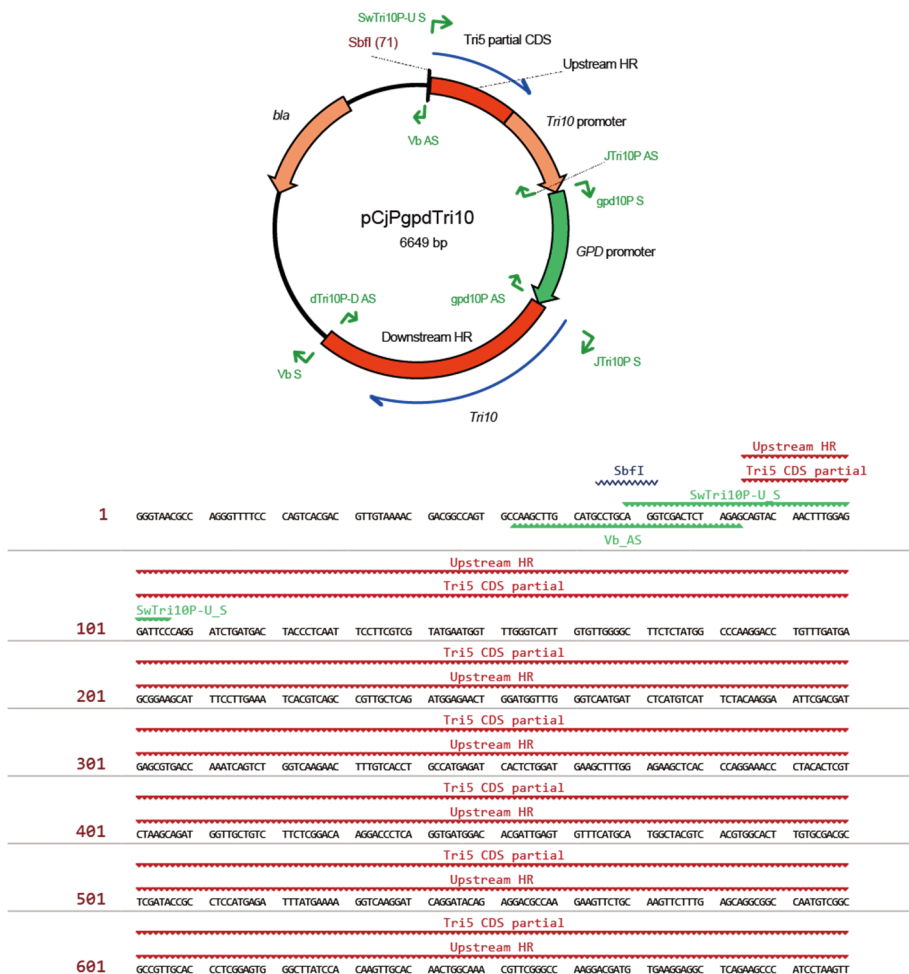



|      |                  |            |            |            |            |                |            |            |            |             |
|------|------------------|------------|------------|------------|------------|----------------|------------|------------|------------|-------------|
|      | Tri5 CDS partial |            |            |            |            |                |            |            |            |             |
|      | Upstream HR      |            |            |            |            | Tri10 promoter |            |            |            |             |
| 701  | CAATTGAGCT       | AGTGGATGAA | CCGAGGCCA  | GTTTGGAGT  | ATGTTTTCG  | GGTACGGATA     | CTCGTTTGA  | GAATGGTGGT | CTGTATAAT  | GATTACAAAT  |
| 801  | Tri10 promoter   |            |            |            |            |                |            |            |            |             |
|      | AGTTCGGTCG       | TGTTTTGTTA | GAATGAACAG | TTGAACAAGG | ATAATTACTT | CGGAATAGGC     | AGTTGAACCT | GAATGCTGT  | ACGTAACTCT | AGCCTGTAAAC |
| 901  | Tri10 promoter   |            |            |            |            |                |            |            |            |             |
|      | CATTTCCCACT      | TTGAGTGCAG | GCTTTTGGCT | AACCAAGTCT | GTACACCCGT | CGGTGCGACA     | GGGCTACCCC | CAACCTCGCA | ACTGCATCTG | CAGCTGCAAC  |
| 1001 | Tri10 promoter   |            |            |            |            |                |            |            |            |             |
|      | TGGCAGACTG       | GTAGACTGGC | GCTACGAATC | GTAGTGCAT  | GCGGGAATCT | TGTACCCGCT     | CGGAGGTTGG | AGGGAGCTGG | CACATTCTCT | AGACCCGCGA  |
| 1101 | Tri10 promoter   |            |            |            |            |                |            |            |            |             |
|      | ATTGATCTTC       | AAAGCGCTTG | CGTTTTGTCC | AGATCAGTGA | CCATACCTT  | GCTTTTTCGC     | ACCACCCAAA | CGTCCACTGA | ACGAGGCGTA | CAGAAACAC   |
| 1201 | Tri10 promoter   |            |            |            |            |                |            |            |            |             |
|      | ACAAGATAG        | GTTTGATGCC | TGCTTGAGCA | CTATGAGGGA | CACGACACTT | CTGTAAACT      | CTATCCTTGC | ATTATATTGT | AACATCGTTT | AACTCTCTCA  |
|      | tef10P_S         |            |            |            |            |                |            |            |            |             |
|      | TEF promoter     |            |            |            |            |                |            |            |            |             |
| 1301 | Tri10 promoter   |            |            |            |            |                |            |            |            |             |
|      | CGCCCATCC        | TTCCCGTCTT | TCCCCCAACT | TCAATTGTAT | GCCAAACAC  | AATCATCAA      | TTATCATTAT | TATTGTGCTT | AGTCATCTAG | CGACTTAGAG  |
|      | JTri10P_AS       |            |            |            |            |                |            |            |            |             |
|      | TEF promoter     |            |            |            |            |                |            |            |            |             |
| 1401 | tef10P_S         |            |            |            |            |                |            |            |            |             |
|      | TGCACGCTCA       | AAAGATAACC | CTAACTCTG  | ATTGTATAG  | ATTGTATAT  | GGCATATAGT     | ACGGCTGAG  | CATAAAAAA  | AAACAGAT   | TATTATAGTT  |
| 1501 | TEF promoter     |            |            |            |            |                |            |            |            |             |
|      | TATTATACG        | AGACAGCAGA | ATACCCGCC  | AAGTTAAGCC | TTTGTGCTGA | TCATGCTCTC     | GAACGGGCCA | AGTTCCGGAA | AAGCAAAGGA | GCSTTTAGTG  |
| 1601 | TEF promoter     |            |            |            |            |                |            |            |            |             |
|      | AGGGCAATT        | TGACTCACCT | CCAGGCAAC  | AGATGAGGGG | GGCAAAAAGA | AAGAAATTTT     | CGTGAATCAA | TATGGATTCC | GAGCATCAIT | TTCTTGCST   |
| 1701 | TEF promoter     |            |            |            |            |                |            |            |            |             |
|      | CTATCTGCT        | ACGTATGTTG | ATCTTGACGC | TGTGATCAA  | GCAACGCCAC | TCGCTCGCTC     | CATCGCAGGC | TGGTCGCGA  | CAAAITAAAA | GGCGGCAAC   |
| 1801 | TEF promoter     |            |            |            |            |                |            |            |            |             |
|      | TGCTACAGCC       | CGGGGGTGT  | CCGCTGCAA  | GTACAGAGTG | ATAAAGCGG  | CCATGCGACC     | ATCAACGCGT | TGATGCCAG  | CTTTTTCGAT | CCGAGATCC   |
| 1901 | TEF promoter     |            |            |            |            |                |            |            |            |             |
|      | ACGCTAGAGG       | CGATAGCAAG | TAAAGAAAAG | CTAAACAAA  | AAAAATTCT  | GCCCCAAGC      | CATGAAAAGG | AGATGGGGTG | GAGCAGAAC  | AAGGAAAGAG  |
| 2001 | TEF promoter     |            |            |            |            |                |            |            |            |             |
|      | TCGCGCTGGG       | CTGCCGTTC  | GGAGGTGTT  | GTAAAGGCTC | GACGCCCAAG | GTGGAGTCT      | AGGAGAGAA  | TTTGCAATCG | GAGTGGGGCG | GTTTACCCCT  |
| 2101 | TEF promoter     |            |            |            |            |                |            |            |            |             |
|      | CCATATCCA        | TGACAGATAT | CTACAGCCA  | AGGGTTGAG  | CCCGCCGCT  | TAGTGTGCTG     | CTCGGCTTG  | CCCTCCATA  | AAGGATTTC  | CCTCCCCCTC  |
| 2201 | TEF promoter     |            |            |            |            |                |            |            |            |             |
|      | CCACAAATT        | TTCTTTCCCT | TCCTCTCCT  | GTCCGCTTCA | GTACGATAT  | CTCCCTTCC      | CTCGCTCTC  | TCCTCCATCC | TTCTTTCATC | CATCTCTGC   |
|      | Downstream HR    |            |            |            |            |                |            |            |            |             |
|      | Tri10            |            |            |            |            |                |            |            |            |             |
|      | JTri10_S         |            |            |            |            |                |            |            |            |             |
| 2301 | TEF promoter     |            |            |            |            |                |            |            |            |             |
|      | TACTTCTCT        | GTACAGACC  | TCTACGATT  | ACTAGCGTA  | GTATCTGAGC | ACTTCTCCCT     | TTTATATCC  | ACAAACATA  | ACACACCTT  | CACCATGAT   |
|      | tef10P_AS        |            |            |            |            |                |            |            |            |             |
| 2401 | Tri10            |            |            |            |            |                |            |            |            |             |
|      | JTri10_S         |            |            |            |            |                |            |            |            |             |
|      | Downstream HR    |            |            |            |            |                |            |            |            |             |
|      | TTCCCAAGC        | CTAGACAAGT | CCGAGAGAGC | AGCTGTTGA  | TGTACTACCT | AGAGCTGGTG     | TTTCTCTGCG | AATGCTCAA  | CCCAACAC   | AATTGTCTGG  |
|      | tef10P_AS        |            |            |            |            |                |            |            |            |             |
| 2501 | Tri10            |            |            |            |            |                |            |            |            |             |
|      | Downstream HR    |            |            |            |            |                |            |            |            |             |
|      | GAAGAGAGA        | GTGGCTGTTG | ACTATACTGA | CCTTGCAGG  | GCCTACGTAC | TATGACCAT      | TGTGCAATG  | GCCTCTAT   | AAAGATCGC  | TTTCAAGCCC  |
| 2601 | Tri10            |            |            |            |            |                |            |            |            |             |
|      | Downstream HR    |            |            |            |            |                |            |            |            |             |
|      | TTGCAGTCT        | GAACAGCGA  | TGGTATGAA  | GAGAGAGAG  | ACATACTACT | ACATTCTTGC     | ACTCAGGAG  | TCTCAGAGC  | TGCTGGGTGG | GCTCGACAG   |
| 2701 | Tri10            |            |            |            |            |                |            |            |            |             |
|      | Downstream HR    |            |            |            |            |                |            |            |            |             |
|      | ACATTTGCA        | TCACAGGCT  | GAAGGTACC  | GTGCTGCCC  | TTGCTTGAT  | GCTACAGCTT     | ATCAGTTTGG | AGGTAGAGC  | AATCCACAT  | TGTTGCGATG  |
| 2801 | Tri10            |            |            |            |            |                |            |            |            |             |
|      | Downstream HR    |            |            |            |            |                |            |            |            |             |
|      | CTGAGTGG         | ATGCTGATA  | TCCGATCTAC | GATTATGTT  | GGTCACTAGC | AAATTAAAT      | AGTCTTGGCA | CCTAGCAGG  | GGAGATTGGC | GGTTTCACT   |
| 2901 | Tri10            |            |            |            |            |                |            |            |            |             |
|      | Downstream HR    |            |            |            |            |                |            |            |            |             |
|      | CCATGCGGC        | AACTACTCA  | TTCTGTCTT  | GTTTGAGGA  | TGGTCCACAG | CTTTGCAATC     | AGGCCCCCA  | GGCACTCCA  | TATGTTGCGA | GCTGGATGA   |
| 3001 | Tri10            |            |            |            |            |                |            |            |            |             |
|      | Downstream HR    |            |            |            |            |                |            |            |            |             |
|      | TCACACTCTG       | GCTCGACTGA | AGATCAAAAC | TCTTTGAGCT | TCGAATAGCT | CGAGCTTTG      | AGATTCCTGT | CAAACTCACT | CGCCGAGTC  | GGCATCCTGT  |
| 3101 | Tri10            |            |            |            |            |                |            |            |            |             |
|      | Downstream HR    |            |            |            |            |                |            |            |            |             |
|      | CTGCTATATC       | TATTGGCCA  | TCAGACCAT  | TTGAAGATTA | CGGCACTCTC | CTGACCAAGC     | CAGGCTTAT  | ACAGCTGAGC | GAGTGTGG   | GTTGCGAGAA  |
| 3201 | Tri10            |            |            |            |            |                |            |            |            |             |
|      | Downstream HR    |            |            |            |            |                |            |            |            |             |
|      | TTGACCATG        | TTGACTATC  | TGAGTGGG   | TAGCTGGAT  | CGTTGGAGC  | GACAGAGCA      | AGAACATAAT | CGCTTGAGCC | TAAAGAGCT  | CGTAGGCGC   |
| 3301 | Tri10            |            |            |            |            |                |            |            |            |             |
|      | Downstream HR    |            |            |            |            |                |            |            |            |             |
|      | GCATATGTA        | TGAGGATAT  | GTGTGAGC   | GAGCTACAAA | GCTACCGAC  | AGACGAGCG      | CTTCAGAGC  | TCATCACTCA | GATTAGGCC  | GCCTCTATCA  |
| 3401 | Tri10            |            |            |            |            |                |            |            |            |             |
|      | Downstream HR    |            |            |            |            |                |            |            |            |             |
|      | TGACGTATCT       | GCATACAGTA | GTTTCCGAGC | TCAATCCCAA | CCTTTCAGAG | GTTCAAGATA     | GTGTGCGCG  | GACGCTTCAA | TTGTGGAGA  | GCTCCCAA    |
| 3501 | Tri10            |            |            |            |            |                |            |            |            |             |
|      | Downstream HR    |            |            |            |            |                |            |            |            |             |
|      | TCTTGAGCT        | GTACAGGCG  | TTACTTGCC  | TCTAGCTGT  | ACAGATGCA  | TGGCTCAGA      | AGTGCATAAG | GACTTTTCA  | GAATACTCT  | GAGGTGAT    |



multiple genetic manipulations for the overproduction of 15-ADON. The previously described strain  $\Delta Tri6$  tk (YN\_001) contains a hygromycin B phosphotransferase gene translationally fused to a herpes simplex virus thymidine kinase gene (*hph::tk*) [9, 10]. This strain was used to generate a marker-free *Tri6*-overexpressor strain YN\_004 ( $\Delta Tri6$  /  $P_{TEF}::Tri6$ ) by conditional negative selection against the *hph::tk* cassette with 2'-deoxy-5-fluorouridine (5-FdU). In strain YN\_004, a strong *Aspergillus nidulans* *TEF1 $\alpha$*  promoter fragment [9] is inserted upstream of the *Tri6* coding region. The promoter disruptants YN\_112 ( $\Delta Tri6$  /  $P_{TEF}::Tri6$ ,  $\Delta P_{Tri10}$  /  $P_{GPD}::hph::tk$ ) and YN\_109 ( $\Delta P_{Tri10}$  /  $P_{GPD}::hph::tk$ ) were obtained from YN\_004 and the WT strains, respectively, by positive selection against *hph::tk* with hygromycin B. Marker-free transformants YN\_120 ( $\Delta Tri6$  /  $P_{TEF}::Tri6$ ,  $\Delta P_{Tri10}$  /  $P_{GPD}$ ) and YN\_116 ( $\Delta P_{Tri10}$  /  $P_{Tri10}$  +  $P_{TEF}$ ) were obtained from YN\_112 and YN\_109, respectively, by the negative selection. (B) Generation of strains YN\_120 and YN\_116. YN\_004 was created from YN\_001 following transformation with pCjTefTri6, where 5-FdU resistant transformants with double crossover homologous recombination were negatively selected against *hph::tk*. YN\_112 and YN\_109 were created from YN\_004 and the WT strains, respectively, by positive selection with hygromycin B following transformation with pdTri10p-hphtk. YN\_120 and YN\_116 were created by negative selection with 5-FdU, respectively, following transformation of YN\_112 with pCjPgpdTri10 and YN\_109 with pCjPtefTri10. (C) Production of trichothecenes by the transgenic strains. The WT (JCM 9873), YN\_004, YN\_116, and YN\_120 strains were cultured on 100 mL of YS\_60 (0.1% [w/v] Bacto™ yeast extract, 6% [w/v] sucrose) and YG\_60 (0.1% [w/v] Bacto™ yeast extract, 6% [w/v] glucose) medium in a 300 mL-Erlenmeyer flask with gyratory shaking at 25°C. In contrast to the WT and *Tri6*-overexpressor YN\_004 strains, YN\_116 produced 15-ADON on YG\_60 medium that does not contain sucrose. The 15-ADON production was further enhanced in the culture of YN\_120, in which both *Tri6* and *Tri10* were constitutively overexpressed. YN\_120 also produced 15-ADON on YG medium (0.5% [w/v] Bacto™ yeast extract, 2% [w/v] glucose) that contains a lower amount of glucose and a higher amount of yeast extract. (D) Sequences and maps of disruption and replacement vectors.

(A)

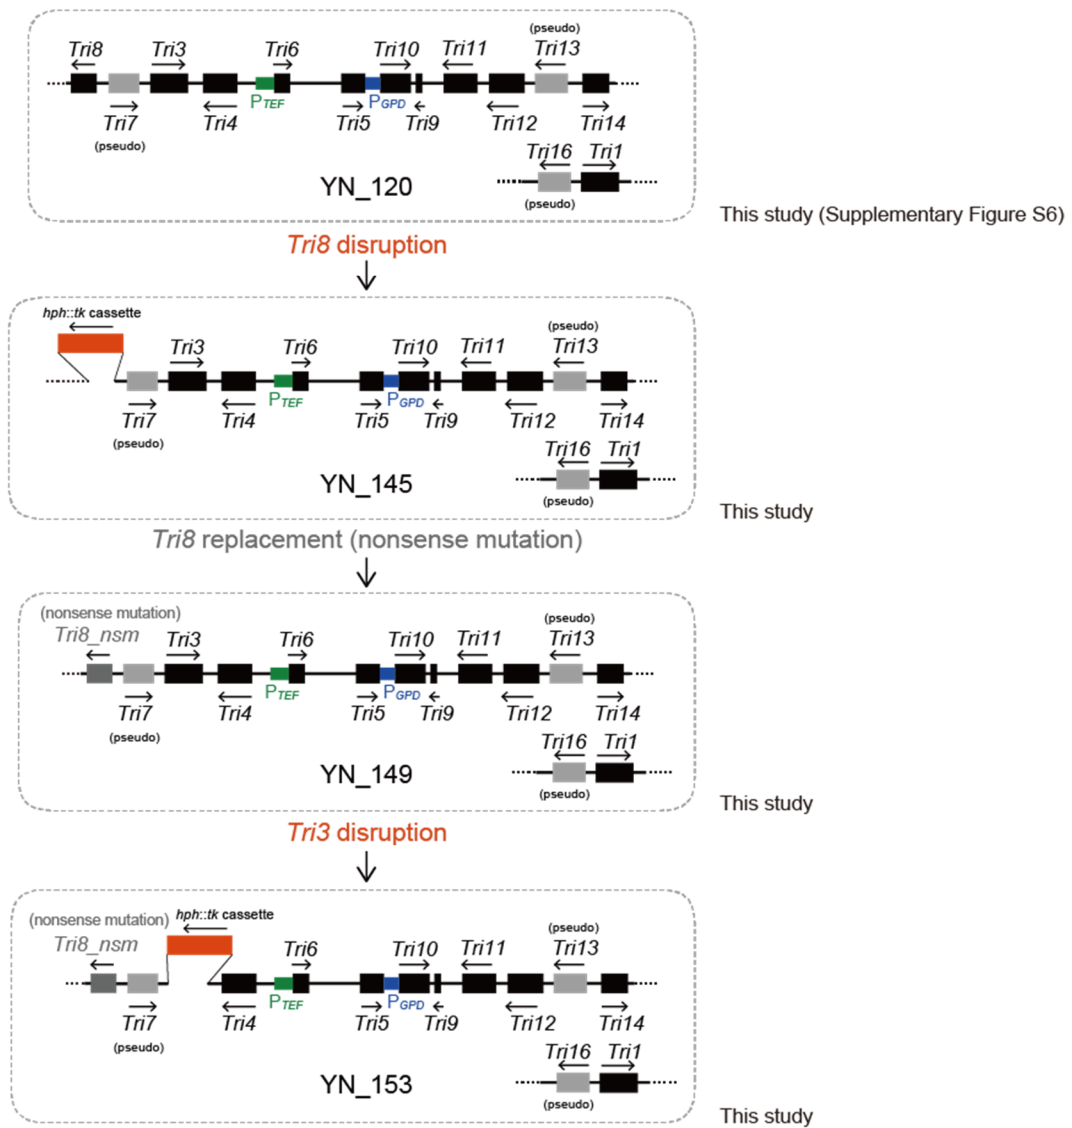

(B)

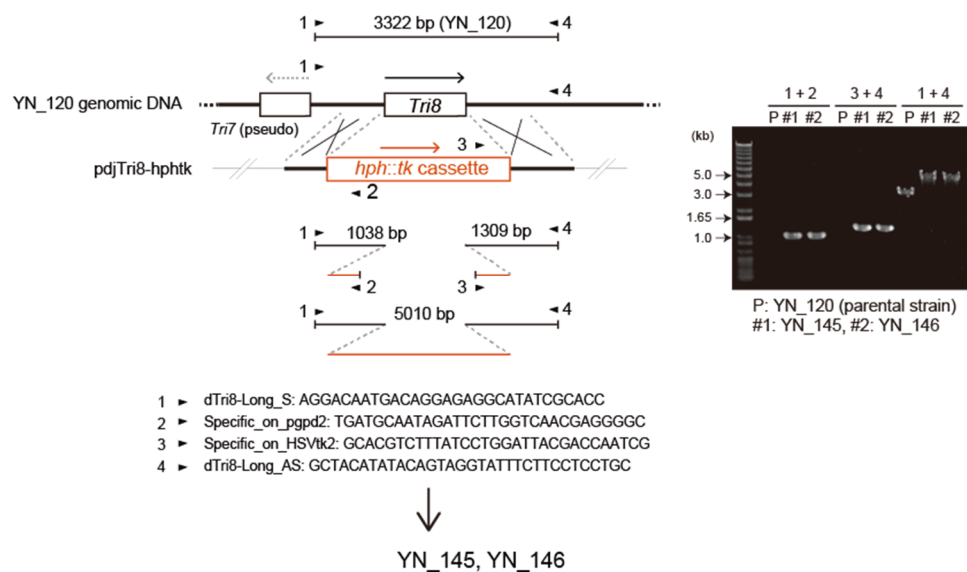

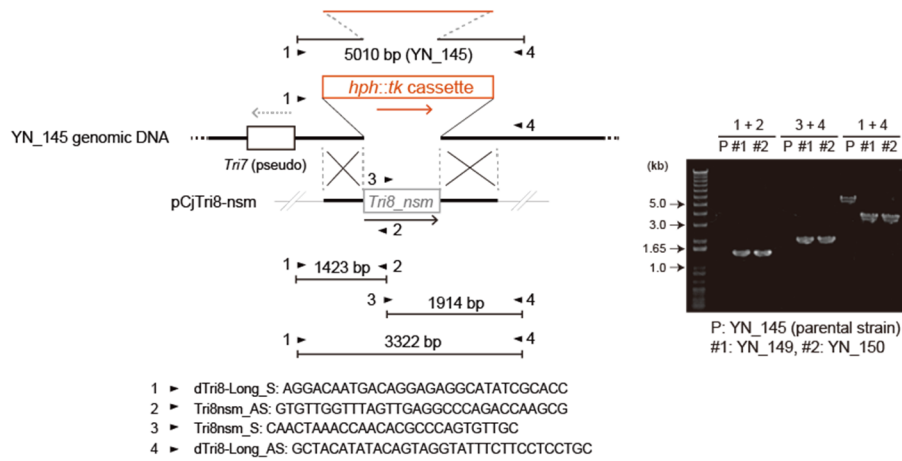

YN149, YN150

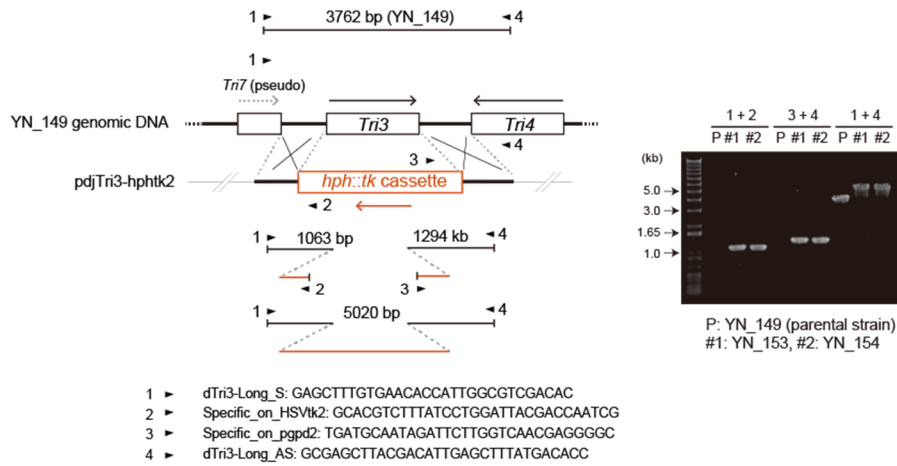

YN\_153, YN\_154

(C)

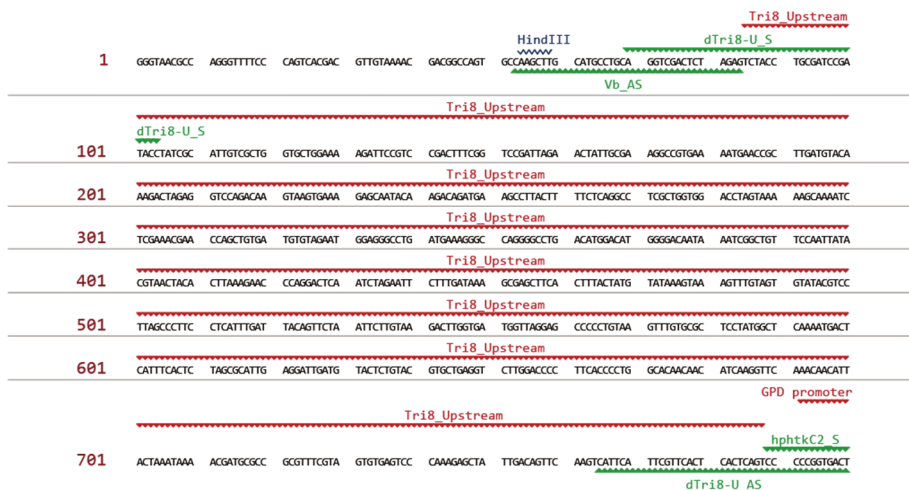



|      |            |                 |            |            |            |            |            |            |            |            |             |
|------|------------|-----------------|------------|------------|------------|------------|------------|------------|------------|------------|-------------|
|      |            | GPD promoter    |            |            |            |            |            |            |            |            |             |
| 801  | hphTkC2_5  | CTTTCTGGCA      | TGCGGAGAGA | CGACGACGAC | CAGAGAGAA  | GGCTGAGTAA | TAGGCCAC   | TGCGCCAGAC | AGCTCTGGCG | GCTCTGAGGT | GCAGTGGATG  |
|      | dTri8-U_AS |                 |            |            |            |            |            |            |            |            |             |
| 901  |            | GPD promoter    |            |            |            |            |            |            |            |            |             |
|      |            | ATTATTATC       | CGGACCCGC  | CGCCCTCCG  | CCCGAAGTG  | GAAAGCTGG  | TGTGCCCTC  | GTTGACCAAG | AATCTATTG  | ATCATCGAG  | AATATGGAGC  |
| 1001 |            | GPD promoter    |            |            |            |            |            |            |            |            |             |
|      |            | TTTATCGAT       | CACCGCAGT  | AAGCGAAGA  | GAATGTGAAG | CCAGGGGTGT | ATAGCGTGC  | GCAGAAATAG | ATGCCATTAA | CCTAGGTACA | GAAGTCCAAT  |
| 1101 |            | GPD promoter    |            |            |            |            |            |            |            |            |             |
|      |            | TGCTTCGAT       | CTGGTAAAG  | ATTACAGGA  | TAGTACCTTC | TCCGAAGTAG | GTAGAGCGAG | TACCCGCGC  | GTAAGCTCCC | TAATTGGCCC | ATCCGGCATC  |
| 1201 |            | GPD promoter    |            |            |            |            |            |            |            |            |             |
|      |            | TGTAGGGGT       | CCAAATATC  | TGCTCTCTCT | GCTTTGCCCG | GTGTATGAAA | CCGAAAGGC  | CGCTCAGAG  | CTGGCAGCG  | GCSCAGACCG | GGAGACACAAG |
| 1301 |            | GPD promoter    |            |            |            |            |            |            |            |            |             |
|      |            | CTGGCAGTC       | ACCCATCCG  | TGCTCTGAC  | TGACCTGCT  | GAGGTCCCTC | AGTCCCTGGT | AGGCAGCTTT | GCCTCGCTG  | TCCGCCCGGT | GTGTCCGCG   |
| 1401 |            | GPD promoter    |            |            |            |            |            |            |            |            |             |
|      |            | GGTTGACAG       | GTGTTGGGT  | CAGTCCAGCA | TTTGTGGCA  | TATTTTCTG  | CTCTCCCGAC | CAGTGGCTCT | TTTCTTTTCT | CTTCTTTTCT | CCATCTTCAG  |
| 1501 |            | GPD promoter    |            |            |            |            |            |            |            |            |             |
|      |            | TATATCATC       | TTCCCATCA  | AGAACCTTA  | TTTCCCTAA  | GTAACTACTT | TGCTACATCC | ATACTCCATC | CTTCCATCC  | CTTATTCCT  | TGACCTTTTC  |
| 1601 |            | GPD promoter    |            |            |            |            | hph        |            |            |            |             |
|      |            | AGTCTGAGT       | TTCCCATTC  | ATGCGAGCT  | GACTAACGC  | TACCCGCTT  | GAGATCGATA | TGAAAAAGCC | TGAATCACC  | GCAGGCTCTG | TGAGAGAGTT  |
| 1701 |            | hph             |            |            |            |            |            |            |            |            |             |
|      |            | TCTGCTGAA       | AAATTGACA  | GGTCTCCGA  | CCTGATGAG  | CTCTCGAGG  | GGGAAGATC  | TGCTGCTTT  | AGCTTCGATG | TAGAGGGCG  | TGGATATGTC  |
| 1801 |            | hph             |            |            |            |            |            |            |            |            |             |
|      |            | CTGGGCTAA       | ATAGCTGCG  | CGATGGTTC  | TACAAAGATC | GTATGTTTA  | TGCGCACTTT | GCATCGGCG  | CGCTCCCGAT | TCCGGAAGTG | CTGACATTG   |
| 1901 |            | hph             |            |            |            |            |            |            |            |            |             |
|      |            | GGAGTTTCA       | CGAGAGCTG  | ACCTATTGA  | TCTCCCGCG  | TGCACAGGT  | GTACGTTGC  | AAGACCTGCC | TGAACCGAA  | CTGCCGCTG  | TCTCCAGCC   |
| 2001 |            | hph             |            |            |            |            |            |            |            |            |             |
|      |            | GGTCCGAGG       | GCATGAGTG  | CGATCGTGC  | GGCGATCTT  | AGCCAGACGA | CGGGTTCGG  | CCATTCCGA  | CCGCAAGAA  | TGGTCAATA  | CACATACAG   |
| 2101 |            | hph             |            |            |            |            |            |            |            |            |             |
|      |            | CGTATTTCA       | TATGCGCAT  | TGCTGATCC  | CATGTGATC  | ACTGGCAAC  | TGTGATGAC  | GACACGTCG  | GTGCTCCGT  | CGCGAGGCT  | CTGATGAGC   |
| 2201 |            | hph             |            |            |            |            |            |            |            |            |             |
|      |            | TGATGCTTG       | GGCGAGGAC  | TGCGCCGAG  | TCCGGACCT  | CGTGATGCG  | GATTTCCGCT | CCACCAATGT | CTGACGAC   | AATGGCCGCA | TACAGCGGT   |
| 2301 |            | hph             |            |            |            |            |            |            |            |            |             |
|      |            | CATTGCTAG       | AGCGAGGCG  | TGTTGGGGA  | TTCCCAATAC | GAGGTGCGCA | ACATCTCTT  | CTGGAGGCG  | TGGTTGGCT  | GTATGAGCA  | GCAGACGCG   |
| 2401 |            | hph             |            |            |            |            |            |            |            |            |             |
|      |            | TACTTCAAG       | GGAGCATCC  | GGAGCTTGA  | GGATCGCCG  | GCCTCCGGG  | GTATATGCT  | CGATTGGTC  | TTGACCACT  | CTATCAGAG  | TTGGTTGAG   |
| 2501 |            | hph             |            |            |            |            |            |            |            |            |             |
|      |            | GCATTTGCA       | TGATCGAGT  | TGCGCGAGG  | GTGATCGCA  | CGCAATGCT  | CGATCCGAG  | CCGGAGCTGT | CGCGCTACA  | CAATCGCCC  | GCAGAGGCG   |
| 2601 |            | hph             |            |            |            |            | HSVtk      |            |            |            |             |
|      |            | GGCGCTGCG       | ACCGATGGT  | GTGTAGAAG  | ACTCGCGAT  | AGTGGAACC  | GACGCCCCG  | CACCTGCGG  | AGGGCAAGG  | AAATGCTCT  | GTACCCCGC   |
| 2701 |            | HSVtk           |            |            |            |            |            |            |            |            |             |
|      |            | CATCAACAG       | CGTCTGGGT  | CGACAGGCT  | GGCGTTCTC  | GGCGCATAG  | CAACGAGGT  | ACGGGTTGC  | GGCTCGCGG  | GCAGCAAGAA | GCCACGGAG   |
| 2801 |            | HSVtk           |            |            |            |            |            |            |            |            |             |
|      |            | TCCCGCGGA       | GCAGAAATG  | CCACGCTAC  | TGCGGTTTA  | TATAGAGGT  | CCCCAGGGA  | TGGGAAACC  | CACCAACAG  | CAACTGCTG  | TGGCCTTGG   |
| 2901 |            | HSVtk           |            |            |            |            |            |            |            |            |             |
|      |            | TTGCGGAC        | GATATGCT   | ACGTACCGA  | GCCGATGCT  | TACTGGCGG  | TGCTGGGGG  | TTCCGAGACA | ATCGCAACA  | TCTACACAC  | ACAACACCG   |
| 3001 |            | HSVtk           |            |            |            |            |            |            |            |            |             |
|      |            | CTCGACAGG       | GTGAGATAT  | GGCCGGGAC  | GGCGCGGTG  | TAATGACAG  | CGCCAGATA  | ACAATGGGA  | TGCTTATGC  | CGTGACGAC  | GCCGTTCTG   |
| 3101 |            | HSVtk           |            |            |            |            |            |            |            |            |             |
|      |            | CTCTCATAT       | CGGGGGGAG  | GCTGGAGCT  | CACATGCCC  | GGCCCCGGC  | CTCACCTCA  | TCTTGAGCG  | CCATCCCAT  | GGCCCTCTC  | TGTGTACCC   |
| 3201 |            | HSVtk           |            |            |            |            |            |            |            |            |             |
|      |            | GGCCCGCGG       | TACCTTATG  | GCAGCATGAC | CCCCAGGCC  | GTGCTGGGT  | TGTTGGGCT  | CATCCCGCG  | ACCTTGCCG  | GCACCAAGT  | CGTGCTTGG   |
| 3301 |            | HSVtk           |            |            |            |            |            |            |            |            |             |
|      |            | GGCTTCCGG       | AGGACAGACA | CATCGACCG  | CTGGCAAAC  | GCCAGCGCC  | CGCGAGCGG  | CTGACCTGG  | CTATGCTGC  | TGCGATTGC  | CGCGTTTACG  |
| 3401 |            | HSVtk           |            |            |            |            |            |            |            |            |             |
|      |            | GGTACTTGC       | CAATACGAT  | CGTATCTGC  | AGTGGGCGG  | GTGTTGGCG  | GAGAGCTGG  | GACAGCTTT  | GGGAGCGGC  | GTGCGCCCC  | AGGGTCCGA   |
| 3501 |            | HSVtk           |            |            |            |            |            |            |            |            |             |
|      |            | GGCCGAGAG       | AAAGCGGGC  | CAGCAGCCA  | TATCGGGAC  | ACGTTATTTA | CCCTGTTTC  | GGCCCCGAG  | TTGCTGGCC  | CCAAGCGGA  | CTGTATAAC   |
| 3601 |            | HSVtk           |            |            |            |            |            |            |            |            |             |
|      |            | GTGTTGCTC       | GGGCTTGA   | CGTCTGGCC  | AAAGGCTCC  | GTTCATGCA  | CGTCTTATC  | CTGGATTAG  | ACCAATCGC  | CGCGGCTGC  | CGGAGCGCC   |
| 3701 |            | HSVtk           |            |            |            |            | dTri8-D_S  |            |            |            |             |
|      |            | TGCTGCACT       | TACCTCCGG  | ATGTCCAGA  | CCACGCTAC  | CACCCCCGC  | TCATACCGA  | CGATATGCA  | CTTGGCGCG  | ACGTTTCCC  | GGGAGATGG   |
|      |            |                 |            |            |            |            |            |            |            | hphTkC2_AS |             |
| 3801 |            | Tri8 Downstream |            |            |            |            |            |            |            |            |             |
|      |            | GGAGGCTAAC      | TGACTTTTAT | TTCTTGACAT | CTCTGGCCAT | CGGCTTGGA  | ATTATTTTT  | GGACTGCCG  | TCATGACTT  | GGTACGCCAT | CCCTTATATG  |
|      |            | hphTkC2_AS      |            |            |            |            |            |            |            |            |             |
| 3901 |            | Tri8 Downstream |            |            |            |            |            |            |            |            |             |
|      |            | TTTGGCAGA       | ACCTGTAGT  | GTCTTATCT  | GTGCTTATA  | AAATATTAT  | TGATCTTTT  | CTATGAGTAA | CTTATCTGT  | CTCCGCGAT  | GTAGCTGCAT  |
| 4001 |            | Tri8 Downstream |            |            |            |            |            |            |            |            |             |
|      |            | CTGTAGATT       | CAATAAATC  | ATCAAAAC   | CAGCAGGTA  | GCATTAAATG | AAGAGACCT  | CCAATCTGAA | TAATCTGGT  | GTGTGAGT   | ATTCTGGTT   |
| 4101 |            | Tri8 Downstream |            |            |            |            |            |            |            |            |             |
|      |            | TATTGAGTG       | GCTTTGATC  | GCTCCATT   | CCCTCGAGT  | GTGCTCAGTA | GACAGGGA   | GCATGAGGT  | GGACTCATTT | GAAGCAGAT  |             |
| 4201 |            | Tri8 Downstream |            |            |            |            |            |            |            |            |             |
|      |            | AATTACACTA      | TCATAAAAC  | CAGGTTAGC  | TTGAATGAA  | AAACCATCA  | TCACATTAC  | AGTAGACCA  | CTGATAGAT  | GTGGGTTCA  | AGTAGCCTC   |
| 4301 |            | Tri8 Downstream |            |            |            |            |            |            |            |            |             |
|      |            | ATGTTGCTCT      | GGCATCGTA  | CTTACCCCT  | GGCGCAACA  | TATGATCTT  | TTACACTTCA | TGCAAAACA  | AGGGCATGT  | ATGTTGAGG  | CAATATCAGA  |
| 4401 |            | Tri8 Downstream |            |            |            |            |            |            |            |            |             |
|      |            | CATATAATT       | AATTATAATA | TTGTGGATA  | CTGGGTGGG  | GAAGGCGACT | TGCTCTTAT  | GGAGCTCAAG | CCCTCTGTA  | AGCTCTTTT  | CAAGGTCCT   |
| 4501 |            | Tri8 Downstream |            |            |            |            |            |            |            |            |             |
|      |            | CAGGCTGCA       | AGCTCTTCT  | CAGCTCTGG  | CACATCCGG  | CCTAGCTTCT | TAGATCGAA  | GGCCTTAGG  | AGAGCAGA   | GGACTTGTG  | GCTGAAGCA   |

|      |            |            |             |            |            |             |            |            |            |             |
|------|------------|------------|-------------|------------|------------|-------------|------------|------------|------------|-------------|
| 4601 | ATTAACCTGA | TGAGGCTGTA | GTATCGTCA   | TATGGCCCT  | CTCGAGGCA  | CCTACCTTA   | TGCTTAGCT  | ACTTAGATC  | CTTACTGTAG | TTACTAGTA   |
| 4701 | AGATAACCTG | GTATTGCTC  | TCCTTAGTAA  | AGAATAGTC  | TTCTAGATAG | CTAGGATAT   | AACCTGATAG | GCCTTTTAT  | TGAGGCTGTA | TTATTATATA  |
| 4801 | ATACCTATGA | CATCGGTTAG | CTATATGGAG  | CGATGGACTG | GGGTACCGAG | CTCSAATTCG  | TAATCATGGT | CATAGCTGTT | TCCTGTGTGA | AATTGTTATC  |
| 4901 | CGCTCAAT   | TCCACACAAC | ATACGAGCCG  | GAGCATAAA  | GTGTAAAGCC | TGGGGTGCCCT | AATGAGTGAG | CTAAGCTACA | TTAATTGGGT | TGCGCTCACT  |
| 5001 | GCCCCCTTC  | CAGTCGGGAA | ACCTGTGCTG  | CCAGCTGCAT | TAATGAATCG | GCCACGCGC   | GGGGAGAGGC | GGTTTGGTA  | TTGGGCGCTC | TTCCGCTTCC  |
| 5101 | TGCTCACTG  | ACTCGCTGCG | CTCGGCTGTT  | CGGCTGCGGC | GAGCGGTATC | AGCTCACTCA  | AAGCGGTAA  | TACGGTTATC | CACAGATCA  | GGGGATACG   |
| 5201 | CAGGAAAGAA | CATGTGAGCA | AAAGGCCAGC  | AAAGGCCAGC | GAAACCGTAA | AAGGCCGCGT  | TGCTGGCGTT | TTTCCATAGG | CTCGGCCCCC | CTGACGAGCA  |
| 5301 | TCACAAAAT  | CGACGCTCAA | GTACAGAGTG  | CGGAAACCCG | ACAGGACTAT | AAGATACCA   | GGCGTTTCCC | CTGGAAGCT  | CCCTCGTGCG | CTCTCTGTT   |
| 5401 | CCGACCTGCG | CGCTTACCGG | ATACCTGTCC  | GCCTTTCTCC | CTTCGGGAGG | CGTGGCGCTT  | TCTCATAGCT | CACGCTGTAG | GTATCTCAGT | TCGGTGTAGG  |
| 5501 | TGCTGTGCTC | CAAGCTGGGC | TGTGTGCACG  | AACCCCGCGT | TCAGCCGAC  | CGCTGCGCT   | TATCCGGTAA | CATCTGCTTT | GAGTCCAACC | CGGTAAAGCA  |
| 5601 | CGACTATGCG | CCACTGGGAG | CAGCACTGCG  | TACAGGATT  | AGCAGAGCGA | GGTATGTAGG  | CGGTGCTACA | GAGTCTTTGA | AGTGGTGGCC | TAACTACGGC  |
| 5701 | TACACTAGAA | GGACAGTATT | TGTATCTGCG  | GCCTCTGCTG | AGCCAGTTAC | CTTCGAAAA   | AGAGTTGGTA | GCCTTGTATC | CGGCAACAAA | ACCAACCGCTG |
| 5801 | GTACGGTGGG | TTTTTTTGT  | TGCAAGCAGC  | AGATTACTCG | CAGAAAAAAA | GGATCTCAG   | AGATCTCTTT | GATCTTTCT  | ACGGGCTCTG | ACGCTCAGTG  |
| 5901 | GACGAAAC   | TCACGTAAAG | GGATTTTGT   | CATGAGATTA | TCAAAAAGGA | TCTCACCTA   | GATCTTTTAA | AATTAATAAT | GAAGTTTAA  | ATCAATCTAA  |
| 6001 | AGTATATATG | AGTAAACTTG | GTCTGACAGT  | TACCAATGCT | TAATCAGTGA | GGCACCATC   | TCAGCGACTC | GTCTATTTCG | TTCTCCATA  | GTTCGCTGAC  |
| 6101 | TCGCCGTGGT | GTAGATAACT | ACGATACGGG  | AGGGCTTACC | ATCTGGCCCC | AGTGGTCAA   | TGATACCGCG | AGACCCACGC | TCACCGGCTC | CAGATTATC   |
| 6201 | AGCAATAAC  | CAGCCAGCCG | GAAGGCCGA   | GGCAGAGT   | GGTCTCTGAA | CTTTATCCG   | CTCCATCCAG | TCTATTAA   | GTTCGCGGA  | AGCTAGATG   |
| 6301 | AGTAGTCCG  | CAGTAAATAG | TTTGGCGAAC  | GTGTGTGCA  | TTGCTACAGG | CATCGTGGTG  | TCACGCTCGT | CGTTTGTAT  | GGCTTATC   | AGCTCCGTT   |
| 6401 | CCCAACGATC | AAGCGAGTT  | ACATGATCCC  | CCATGTTGTG | CAAAAAAGCG | GTTAGCTCTT  | TGCGTCTCTC | GATCGTTGTC | AGAAGTAA   | TGGCCGCACT  |
| 6501 | GTATCACTC  | ATGGTTATGG | CAGCACTGCA  | TAATCTCTT  | ACTGTATGC  | CATCCGTAAG  | ATGCTTTTCT | GTAGCTGGTG | AGTACTCAAC | CAAGTCACT   |
| 6601 | TGAGATAGT  | GTATCGGGCG | ACCGAGTTGC  | TCTTGCCCGG | CGTCAATACG | GGATAATACC  | GGCCACATA  | CGAGAACTTT | AAAAGTCTC  | ATCATTGGAA  |
| 6701 | AACGTTCTTC | GGGGCGAAAA | CTCTCAAGGA  | TCTTACCGCT | GTGAGATCC  | AGTTGATGT   | AACCCACTCG | TGACCCCAAC | TGATCTTCAG | CATCTTTTAC  |
| 6801 | TTTCACAGC  | GTTCCTGGGT | GAGCAAAAAC  | AGGAGGCCAA | AATGCCGCAA | AAAGGGAAAT  | AAGGCCGACA | CGGAATGTT  | GAATACTCAT | ACTCTCTCT   |
| 6901 | TTTCAATAT  | ATTGAAGCAT | TTATCAGGGT  | TATTGTCTCA | TGAGCGGATA | CATATTGAA   | TGATTTAGA  | AAAAAACA   | AATAGGGTT  | CCGCGCACAT  |
| 7001 | TTCCCCGAAA | AGTGCACCT  | GACGTCTAAG  | AAACATTAT  | TATCATGACA | TTAACCCTATA | AAATAGGCG  | TATCAGAGG  | CCCTTTGCTC | TCGCGCGTT   |
| 7101 | CGGTGATGAC | GGTGAAGAAC | TCTGACACAT  | GCAGCTCCCG | GAGACGCTCA | CAGCTTGTCT  | GTAAAGCGAT | GGCGGAGCA  | GACAGCCCG  | TCAGGGCGCG  |
| 7201 | TCAGGGGGTG | TTGGCGGGTG | CTTAACATATG | TCGGGCGTGG | CGGCATCAGA | GCAGATTGTA  | CTGAGAGTGC | ACCATATGCG | GTGTGAATA  | CCGACAGAT   |
| 7301 | CGGTAGGAG  | AAATACCGC  | ATACGGCGCC  | ATTGCCCAT  | CAGGCTGCGC | AACGTGTGGG  | AAGGGCGATC | GGTGGGGCC  | TCTTGGCTAT | TAGCCAGCT   |
| 7401 | GGCGAAGGG  | GGATGTGCTG | CAAGCGATT   | AAGTT      |            |             |            |            |            |             |

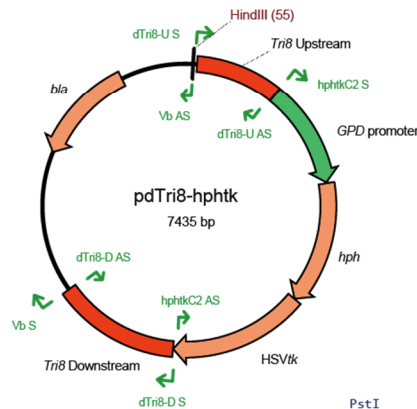

|     |            |            |            |            |            |            |            |            |            |            |
|-----|------------|------------|------------|------------|------------|------------|------------|------------|------------|------------|
| 1   | GGTAAACGCC | AGGGTTTTCC | CAGTCACGAC | GTGTGAAAAC | GACGCCAGCT | GCACAGCTTG | CATGCTGCA  | GGTGGACTCT | AGAGTCTACC | TGCGATCCGA |
| 101 | TACCTATGCG | ATTGTGCGTG | GTGCTGGAAA | AGATTCCGTC | CGACTTTCCG | TCCGATTAGA | ACTATTGCGA | AGGCGGTGAA | AATGACCCGC | TTGATGTACA |
| 201 | AGACCTAGAG | GTCCAGACAA | GTAAAGTAAA | GAGCAATACA | AGCAGATGA  | AGCCTTACTT | TTCTCAGGCC | TCGCTGGTGG | ACCTAGTAAA | AAGCAAAATC |
| 301 | TCGAGCAAGA | CGAGCTGTGA | TGTGTAGAT  | GGAGGGCTGT | ATTGAAGGCG | CAGGGGCTTG | ACATGACAT  | GGGCAATA   | AATCGGCTGT | TCCAATTATA |
| 401 | CGTAACCTCA | CTTAAGAAC  | CCAGGACTCA | ATCTAGAAIT | CTTTGATAAA | CGAGCTTCA  | CTTACTATG  | TATAAGTAA  | AGTTTGTAGT | GTATACGTC  |
| 501 | TTAGCCCTTC | CTCAATTGAT | TACAGTTCTA | ATTCTGTGAA | GACTTGGTGA | TGGTAGGAG  | CCCCCTGTAA | GTTTGTGCGC | TCCTATGGCT | CAAAATGACT |
| 601 | CATTTCATC  | TAGCGCATTG | AGGATTGATG | TACTCTGTAC | GTGCTGAGGT | CTTGACCCG  | TTACCCCTG  | GCACCAAC   | ATCAGGTTTC | AAACAACTT  |
| 701 | ACTAAATAA  | ACGATGCGCC | GGTTCGTA   | GTGTGAGTCC | CAAGAGCTA  | TTGACAGTTC | AAGTCACTCA | TTGCTTCACT | CACCTAGTAT | GGCTCTGAT  |





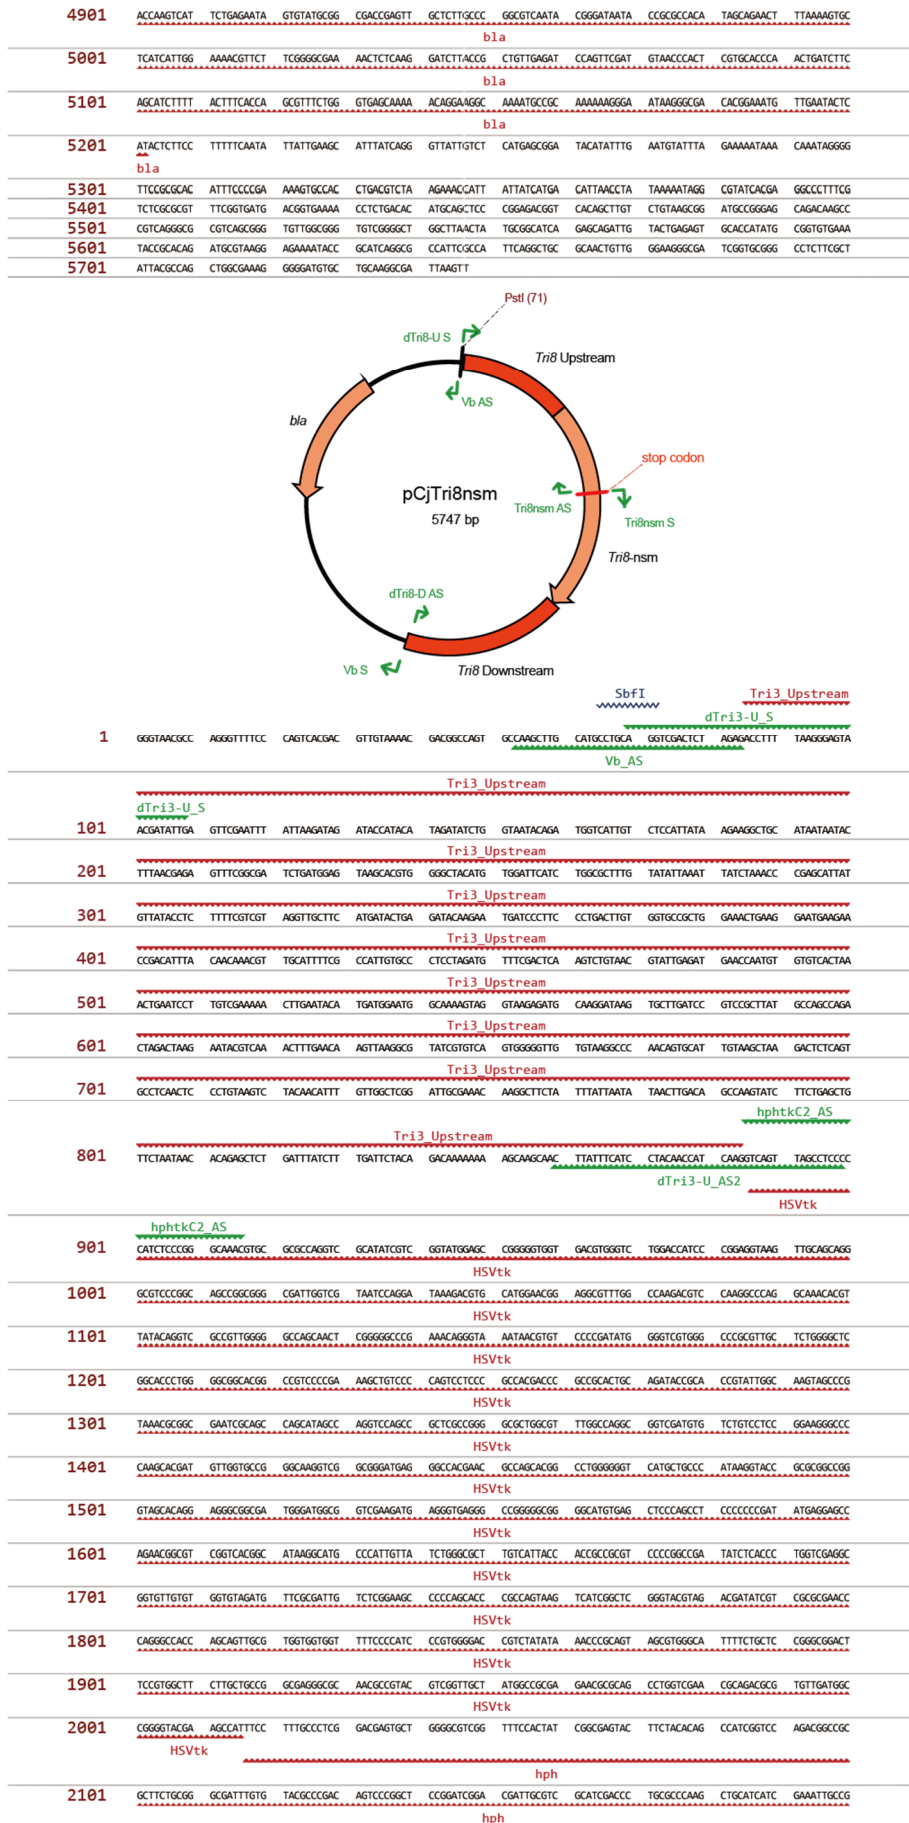

|      |                                                                                                              |
|------|--------------------------------------------------------------------------------------------------------------|
| 2201 | TCAACAAGC TCTGATAGAG TTGTCAGA CCAATGCGGA GCATATACGC CCGAGGCGC GGCATCCTG CAAGCTCCGG ATGCTCCGC TCGAAGTAG       |
|      | hph                                                                                                          |
| 2301 | GCCTCTGCTG CTCACATAA GCCAACACG GCCTCCAGAA GAGGATGTTG GCAGCTCTGT ATTGGGAATC CCCGAACAT GCCTCGCTCC AGTCAATGAC   |
|      | hph                                                                                                          |
| 2401 | CGCTTTATG CGGCATTGT CGCTCAGGAC ATTGTTGGAG CCGAATCCG CATGCAGAG GTGCCGGACT TCGGGECAGT CCTCGGCCA AAGCATACG      |
|      | hph                                                                                                          |
| 2501 | TCATCGAGAG CCTGCGGAC GGACGCACTG ACGGTGTCGT CCATCACAGT TTGCCAGTGA TACACATGGG GATCAGCAAT CGCGCATATG AAATCACGCC |
|      | hph                                                                                                          |
| 2601 | ATGTATGTA TTGACCGATT CCTTSCGTC CGAATGGGCC GAACCCGCTC GTCTGGCTAA GATCGGCCG ACGATCGCA TCCATGGCTT CCSCGACCG     |
|      | hph                                                                                                          |
| 2701 | CTGGAGAACA GCGGGCAGTT CGGTTTCAGG CAGGTCTTGC AACGTGACAC CCTGTGCACG GCGGGAGATG CAATAGTCA GGCCTCTGCT GAATCCCCA  |
|      | hph                                                                                                          |
| 2801 | ATGTCAAGCA CTTCGGAAAT CCGGAGCGG GCCGATGCAA AGTGCCGATA AACATAAGCA TCTTTGTAGA AACCATCGC GCAGCTATTT ACCCGCAGGA  |
|      | hph                                                                                                          |
| 2901 | CATATCAAGC CCCCTCTACA TCGAAGCTGA AAGCACGAGA TTCTTCGCC TCCGAGAGCT GCATCAGTGC GGAGAGCGTG TCGAATCTTT CGATCAGAAA |
|      | hph                                                                                                          |
| 3001 | CTTCTGACA GACGTGCGG TGAGTTCAGG CTTTTTCATA TCGATCTCAA GCGGGTAGC TGTAGTCAA GCTGCATGA AGTGGGAAG CTCGAATGA       |
|      | hph GPD promoter                                                                                             |
| 3101 | AAGGTTCAA GGAATAAGG ATGGGAAGGA TGGAGTATGG ATGTAGCAA GTACTTACTT AGGGGAATA AAGGTTCTTG GATGGGAAGA TGAATATACT    |
|      | GPD promoter                                                                                                 |
| 3201 | GAGATGGGA AAGAAAGAG AAGAAAGAG AGCACTGGT GGGGAGAGCA GAAATATAG TCGACTGAC GCACGAGCT TGTCAACCC                   |
|      | GPD promoter                                                                                                 |
| 3301 | GCGACACAC CGGGCGACA GACGGGCAA AGCTGCTAC CAGGGACTGA GGGACTCAG CAGGTGAGT CGAGAGCACC GGATGGTCTG ACTGCCACT       |
|      | GPD promoter                                                                                                 |
| 3401 | TGTGTTCCG GTCTGCGCG CTGGCAGCT CCTGAGCGC CTTTCGATT TCATACACCG GCGAAGCAG GAGAGCAGC ATATTGGAC GCCCTACAGA        |
|      | GPD promoter                                                                                                 |
| 3501 | TGCCGGATG GCCAATTAGG GAGCTTACGC GCCGGTACT CCGTCTACCT ACTTCGGAGA AGGTACTATC TCGTGAATCT TTTACAGAT CGGAAGCAAT   |
|      | GPD promoter                                                                                                 |
| 3601 | TGCACTCTG TACCTAGTT AATGGATGC TATTTGCGG ACGGCTATAC ACCCTGGCT TCACATTCTC CTTCGCTTAC TGCGGTGAT TCGATGAGC       |
|      | GPD promoter                                                                                                 |
| 3701 | TCCATTCTC CGGATGATC AATAGATTCT TGGTCAACGA GGGGACACAC AGCTTTTCCA CTTGCGGCG GAGGGCGGC CGGTCCCGGA TTAATAATCA    |
|      | GPD promoter                                                                                                 |
| 3801 | TCACATGAC CTGAGAGCG CAGAGACTGT CTGGCGAGT GCGCTTATT ACTCAGCCCT TCTCTCTCG CCGTCCGTC TCTCCGATG CCGAAGAGAG       |
|      | GPD promoter dTri3-D_S2                                                                                      |
|      | hph                                                                                                          |
|      | Tri3 Downstream                                                                                              |
| 3901 | TCACCGGGG TTTCCTGTTT ATTCTGAATG GTACATAGT TTCTCGAGGA GCGATATTGT CAAGGCAACA CTTTGGGGTG GACTTTGATG TCGTGGTAC   |
|      | GPD promoter                                                                                                 |
|      | hph                                                                                                          |
|      | Tri3 Downstream                                                                                              |
| 4001 | TCCAAGGACA GGAAGACATT ACATATGAGC TAGAATGGA TGGGTAAGT TAGTTGAT ATAAATGTAT TTGGAATTT GATTAGAATT TACATTATTA     |
|      | Tri3 Downstream                                                                                              |
| 4101 | CAATTCATT TTTTACTCC CAACATATGA CTTATGTGC TTGATATTAG ATCTTGACA GCGCAGAGCC GAATCTCTAT AATTACAAT GCCTCTAGTT     |
|      | Tri3 Downstream                                                                                              |
| 4201 | TCACGAGC GATTTTTACA TGCAATGAGC TTGTTTAT GTATCAGGC TGTAGTATC AGTCTCAGC AACAGAAA TAGAGTGG GAGTCCAG             |
|      | Tri3 Downstream                                                                                              |
| 4301 | GTGAAGATT TTCTAGTTC AGAAGAGT ATAGATACTA ATTTGGTGA GACACATGT CAACAGAAC TTGAGTTGA CTTTCTATAT GCTAAATAC         |
|      | Tri3 Downstream                                                                                              |
| 4401 | AAGATGAGC CAGTCCGTC TTGATGACA ATCGGATGT TCAACTGTGA GGTAAATGT TTACATGTAT CAACACAAT TGATTGTGCC CTTAAAGCTA      |
|      | Tri3 Downstream                                                                                              |
| 4501 | ACATAGTGG CCTTCAGAG TAACTACAT GTCCAGACA GTTGATGTAT GTAAATATA CTTAGCTTA TTCTAGTAA AGCATATTA TTAGTAATGC        |
|      | Tri3 Downstream                                                                                              |
| 4601 | AGAGAGACT TCCACAGGA GTTAGTTTGA TAGAATGTC ACAAGTATC GGTCTGTAT TCGTCCACA ATACATTGCC TGAGTGAAT AGTGTATAA        |
|      | Tri3 Downstream                                                                                              |
| 4701 | TTGACGAGC TCTAATAGG GTACAATTA TTTTACGTC ASATGTGCT ACTATGACT TCCATCTTG CATACAAAA ATGAGTGA AAGAGAAC            |
|      | Vb_S                                                                                                         |
| 4801 | AGATTCGAT GCCGATACG TGAGTTATCC AGTAAGTAT TGAGACAGT TGTGATGC GCCGGGTAC CGAGCTCGAA TTCGTAATCA TGSTCATAG        |
|      | dTri3-D_A5                                                                                                   |
| 4901 | TGTTCTCTG GTGAATTGT TATCCGCTCA CAATTCCACA CAACATAGCA GCGGAGACA TAAAGTTGAA AGCTGGGGT GCCTAATGAG TGAGCTAAT     |
| 5001 | CACATTAAAT GGTGTGCGCT CACTGCGCG TTTCCAGTCG GGAACCTGT GTGCCAGCT GCATTAAATGA ATCGGCCAAC GCGCGGGAG AGGCGTTTG    |
| 5101 | CGATTGGGC GCTCTCCGC TTCTCTGCT ACTGACTCGC TGCGCTCGT CGTTCGGTG CCGGAGCGG TATCAGCTCA CTCGAAGCG GTAATACGT        |
| 5201 | TATCCACAGA ATCAGGGAT AACGAGAA AGAATGTG ASCAAAAGC CAGAAAGG CAGGAAACG TAAAAGGCC GCGTCTGTC GGTTTTCCA            |
| 5301 | TAGGCTCCG CCCCCTGAGC AGCATCACA AAATCGAGC TCAAGTCAGA GGTGGCGAAA CCGCAGAGGA CTATAAGAT ACCAGCGTT TCCCCCTGA      |
| 5401 | AGCTCCCTG TGCGCTCTCC TGTTCCGACC CTGCGCTTA CCGGATACCT GTCCGCTTT CTCCCTTCGG GAAGGTGGC GCTTTCTCAT AGCTCACGCT    |
| 5501 | GTAGGTATCT CAGTTCGGTG TAGTGTGTC GCTCCAAGCT GGGCTGTGT CACGAACCC CGTTTCAGCC CGAGCGCTG GCTTATCCG GTAACATCG      |
| 5601 | TCTTGATCC AACCGGTAA GACAGACTT ATCGGCACTG GCAGCAGCA CTGTAACAG GATTAGCAGA GCGAGGTATG TAGGCGTGC TACAGATTCT      |
| 5701 | TTGAGTGGT GGCCTAACTA CCGCTACACT AGAAGGAGC TATTGTGAT CTGCGCTCTG CTGAAGCCAG TTACTCTCG AAAAAGATT GGTAGCTCT      |
| 5801 | GATCCGCAA ACAACACCC GCTGGTAGCG GTGGTTTTT TGTGTGCAAG CAGCAGATTA CCGCAGAAA AAAAGSATCT CAAGAGATC CTTTGTACTT     |
| 5901 | TTTACGGGG CTGACGCTC AGTGAGCA AACTCAGCT TAAGGATTG TGTCTAGAG ATTATCAAA AGATCTTCA CCTAGATCT TTTAAATTA           |
| 6001 | AAATGAGTT TTAATCAAT CTAAGTATA TATGATGAA CTTGCTGTA CAGTTACAA TGCTTAATCA GTGAGGCACT TATCTCAGCG ATCTGTCTAT      |
|      | bla                                                                                                          |
| 6101 | TTGCTTATC CATAGTGGC TGACTCCCG TCGTGTAGT AACTACGATA CCGGAGGCT TACCATCTGG CCCCAGTGT GCAATGATAC CCGAGAGCC       |
|      | bla                                                                                                          |
| 6201 | ACGCTCACC GCTCCAGATT TATCAGCAAT AAACAGCCA GCCGGAAGG CCGAGCGAG AAGTGGTCT GCAACTTAT CCGCTCCAT CCAGTCTATT       |
|      | bla                                                                                                          |
| 6301 | AATTGTTGC GGGAGCTAG AGTAAGTAG TCGCCAGTTA ATAGTTTGG CACGTTGTT GCCATTGCTA CAGGATCTGT GGTGTACGC TCGTCTTTG       |
|      | bla                                                                                                          |
| 6401 | GTATGCTTC ATTACGCTC GGTTCGCAAC GATCAGGCG AGTTACATGA TCCCCATGT TGTGCAAAA AGCGGTTAG TCTTCTGCTC CTCCGATCT       |
|      | bla                                                                                                          |
| 6501 | TGTCAAGT AAGTTGCCG CAGTGTATC ACTCATGTT ATGGCAGCAC TGCAATTC TCTTACTGC ATGCCATCG TAAGATGCT TCTGTGACT           |
|      | bla                                                                                                          |

|      |            |            |            |             |            |            |            |            |             |              |
|------|------------|------------|------------|-------------|------------|------------|------------|------------|-------------|--------------|
| 6601 | GGTGAGTACT | CAACCAAGTC | ATTCTGAGAA | TAGTGTATGC  | GGCGACCGAG | TTGCTCTTGC | CCGGCGTCAA | TACGGGATAA | TACCGCGCCA  | CATAGCAGAA   |
|      | bla        |            |            |             |            |            |            |            |             |              |
| 6701 | CTTTAAAGT  | GCTCATCATT | GGAAACGTT  | CTTCGGGGCG  | AAAACCTCA  | AGGATCTTAC | CGCTGTTGAG | ATCCAGTTCC | ATGTAACCCA  | CTCGTGCACC   |
|      | bla        |            |            |             |            |            |            |            |             |              |
| 6801 | CACTGATCT  | TCAGCATCTT | TTACTTTTAC | CAGCGTTTCT  | GGGTGASCAA | AACAGGAGAG | GCAAAATGCC | GCAAAAGAG  | GAATAAGGCG  | GACACGGAAA   |
|      | bla        |            |            |             |            |            |            |            |             |              |
| 6901 | TGTTGAATAC | TCATACCTTT | CTTTTTCAC  | TATTATTGAA  | GCATTATCA  | GGGTTATTGT | CTCATGAGCG | GATACATATT | TGAATGTATT  | TAGAAAAATA   |
|      | bla        |            |            |             |            |            |            |            |             |              |
| 7001 | AACAATAGG  | GGTCCGCGC  | ACATTCCCC  | GAAAAGTGGC  | ACCTGACGTC | TAAGAAACCA | TTATTATCAT | GACATTAAAC | TATAAAAAATA | GGCGTATCAC   |
| 7101 | GAGGCCCTTT | CGTCTCGCGC | GTTTCGGTGA | TGACGGTGA   | AACCTCTGAC | ACATGCAGCT | CCCGGAGACG | GTCACAGCTT | GTCGTGTAAGC | GGATGCCGGG   |
| 7201 | AGCAGACAG  | CCCGTCAGGG | CGCGTCAGCG | GGTGTGGCG   | GGTGTGCGGG | CTGGCTTAAC | TATGCGGCAT | CAGAGCAGAT | TGTACTGAGA  | GTGCACCATATA |
| 7301 | TGCGGTGTGA | AATACCGCAC | AGATGCGTAA | GGAGAAAAATA | CCGCATCAGG | CGCCATTCCG | CATTGAGGCT | GCGCAACTGT | TGGGAAGGGC  | GATCGGTGCG   |
| 7401 | GGCTCTCTCG | CTATTACGCC | AGCTGGCGAA | AGGGGGATGT  | GCTGCANGGC | GATTAAAGTT |            |            |             |              |

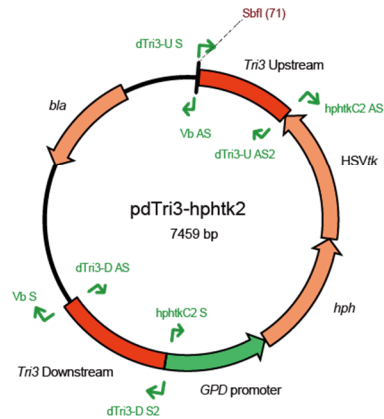

**Supplementary Figure S7.** Transgenic *F. graminearum* strains used for the investigation of the effect of *Tri6* and *Tri10* overexpression on 15-deCAL accumulation. (A) Pedigree of transformants with multiple genetic manipulations for the generation of a *Tri3*-disrupted strain, YN\_153, with overexpression of *Tri6* and *Tri10*. The gene disruptants, YN\_145 ( $\Delta Tri6$  /  $P_{TEF}::Tri6$ ,  $\Delta P_{Tri10}$  /  $P_{GPD}$ ,  $\Delta Tri8$  /  $P_{GPD}::hph::tk$ ) and YN\_153 ( $\Delta Tri6$  /  $P_{TEF}::Tri6$ ,  $\Delta P_{Tri10}$  /  $P_{GPD}$ ,  $\Delta Tri8$  /  $Tri8_{nsm}$ ,  $\Delta Tri3$  /  $P_{GPD}::hph::tk$ ), were obtained from the marker-free transformants YN\_120 (Supplementary Figure S6) and YN\_149 ( $\Delta Tri6$  /  $P_{TEF}::Tri6$ ,  $\Delta P_{Tri10}$  /  $P_{GPD}$ ,  $\Delta Tri8$  /  $Tri8_{nsm}$ ), respectively, by positive selection. YN\_149 was created from YN\_145 by negative selection. (B) Generation of strain YN\_153. YN\_145 was created from YN\_120 by positive selection with hygromycin B following transformation with pdjTri8-hphtk. YN\_149 was created from YN\_145 by negative selection with 5-FdU following transformation with pCjTri8-nsm. YN153 was created from YN\_149 by positive selection with hygromycin B after transformation with pdjTri3-hphtk2. (C) Sequences and maps of disruption and replacement vectors.

## References

1. Kimura, M.; Kamakura, T.; Tao, Q.Z.; Kaneko, I.; Yamaguchi, I. Cloning of the blasticidin S deaminase gene (*BSD*) from *Aspergillus terreus* and its use as a selectable marker for *Schizosaccharomyces pombe* and *Pyricularia oryzae*. *Mol. Gen. Genet.* **1994**, *242*, 121-129. DOI:10.1007/bf00391004.
2. Banno, S.; Kimura, M.; Tokai, T.; Kasahara, S.; Higa-Nishiyama, A.; Takahashi-Ando, N.; Hamamoto, H.; Fujimura, M.; Staskawicz, B.J.; Yamaguchi, I. Cloning and characterization of genes specifically expressed during infection stages in the rice blast fungus. *FEMS. Microbiol. Lett.* **2003**, *222*, 221-227. DOI:10.1016/s0378-1097(03)00307-0.
3. Maeda, K.; Tanaka, A.; Sugiura, R.; Koshino, H.; Tokai, T.; Sato, M.; Nakajima, Y.; Tanahashi, Y.; Kanamaru, K.; Kobayashi, T.; Nishiuchi, T.; Fujimura, M.; Takahashi-Ando, N.; Kimura, M. Hydroxylations of trichothecene rings in the biosynthesis of *Fusarium* trichothecenes: evolution of alternative pathways in the nivalenol chemotype. *Environ. Microbiol.* **2016**, *18*, 3798-3811. DOI:10.1111/1462-2920.13338.
4. Tanaka, A.; Saikawa, S.; Suzuki, T.; Echigo, A.; Maeda, K.; Sato, M.; Fujimura, M.; Tokai, T.; Usami, R.; Yoshida, Y.; Kimura, M.; Takahashi-Ando, N. Acetyltransferase activity in *Pseudomonas* sp. capable of acetylating the C-4 hydroxyl group of nivalenol-type trichothecenes. *J. Gen. Appl. Microbiol.* **2017**, *62*, 326-329. DOI:10.2323/jgam.2016.05.002.
5. Maeda, K.; Tanaka, Y.; Matsuyama, M.; Sato, M.; Sadamatsu, K.; Suzuki, T.; Matsui, K.; Nakajima, Y.; Tokai, T.; Kanamaru, K.; Ohsato, S.; Kobayashi, T.; Fujimura, M.; Nishiuchi, T.; Takahashi-Ando, N.; Kimura, M. Substrate specificities of *Fusarium* biosynthetic enzymes explain the genetic basis of a mixed chemotype producing both deoxynivalenol and nivalenol-type trichothecenes. *Int. J. Food Microbiol.* **2020**, *320*, 108532. DOI:10.1016/j.ijfoodmicro.2020.108532.
6. Maeda, K.; Nakajima, Y.; Koizumi, Y.; Takahashi-Ando, N.; Kimura, M.; Ohsato, S. Accumulation of 4-deoxy-7-hydroxytrichothecenes, but not 4,7-dihydroxytrichothecenes, in axenic culture of a transgenic nivalenol chemotype expressing the NX-type *FgTri1* gene. *Int. J. Mol. Sci.* **2021**, *22*, 11428. DOI:10.3390/ijms222111428.
7. Tokai, T.; Koshino, H.; Kawasaki, T.; Igawa, T.; Suzuki, Y.; Sato, M.; Fujimura, M.; Eizuka, T.; Watanabe, H.; Kitahara, T.; Ohta, K.; Shibata, T.; Kudo, T.; Inoue, H.; Yamaguchi, I.; Kimura, M. Screening of putative oxygenase genes in the *Fusarium graminearum* genome sequence database for their role in trichothecene biosynthesis. *FEMS Microbiol. Lett.* **2005**, *251*, 193-201. DOI:10.1016/j.femsle.2005.07.043.

8. Tokai, T.; Koshino, H.; Takahashi-Ando, N.; Sato, M.; Fujimura, M.; Kimura, M. *Fusarium Tri4* encodes a key multifunctional cytochrome P450 monooxygenase for four consecutive oxygenation steps in trichothecene biosynthesis. *Biochem Biophys Res Commun* **2007**, *353*, 412-417. DOI:10.1016/j.bbrc.2006.12.033.
9. Nakajima, Y.; Tokai, T.; Maeda, K.; Tanaka, A.; Takahashi-Ando, N.; Kanamaru, K.; Kobayashi, T.; Kimura, M. A set of heterologous promoters useful for investigating gene functions in *Fusarium graminearum*. *JSM Mycotoxins* **2014**, *64*, 147-152. DOI:10.2520/myco.64.147.
10. Liew, M.X.X.; Nakajima, Y.; Maeda, K.; Kitamura, N.; Kimura, M. Regulatory mechanism of trichothecene biosynthesis in *Fusarium graminearum*. *Front. Microbiol.* **2023**, *14*, 1148771. DOI:10.3389/fmicb.2023.1148771.
